# Supplementary material for: Methods women use for induced abortion and sources of services: insights from poor urban settlements of Accra, Ghana
Source: Springer Nature journal article supplement (doi:10.1186/s12905-021-01444-9), 2021-08-16
Supplement: MOESM1 [file 19574082]

**WILLOWS EVALUATION STUDY - GHANA  
WOMEN'S BASELINE SURVEY, VERSION 2.0 May 2018**

GHANA

Principal Investigator: Professor Ayaga Bawah, Regional Institute for Population Studies, University of Ghana

**CONSENT**

**INSTRUCTIONS: TAKE OUT A PAPER COPY OF THE BASELINE WOMEN CONSENT FORM. READ THE CONSENT FORM ALOUD, OR ASK THE WOMAN TO READ THROUGH IT. AT THE END OF THE CONSENT FORM, WHEN IT IS TIME TO COLLECT THE RESPONDENT'S SIGNATURE, ASK THE FOLLOWING QUESTION:**

|     |                                              |     |       |   |      |
|-----|----------------------------------------------|-----|-------|---|------|
| CO1 | Do you consent to participate in this study? | YES | ..... | 1 | →END |
|     |                                              | NO  | ..... | 2 |      |

**CONSENT FORM SIGNATURES**

\_\_\_\_\_  
RESPONDENT SIGNATURE OR THUMBPRINT

SIGNATURE OF RESPONDENT INDICATES INFORMED CONSENT WAS PROVIDED.

|     |  |       |  |          |          |          |  |
|-----|--|-------|--|----------|----------|----------|--|
|     |  |       |  | <b>2</b> | <b>0</b> | <b>1</b> |  |
| DAY |  | MONTH |  | YEAR     |          |          |  |

\_\_\_\_\_  
ENUMERATOR SIGNATURE

SIGNATURE OF ENUMERATOR CONFIRMS THAT INFORMED CONSENT WAS PROVIDED.

|     |  |       |  |          |          |          |  |
|-----|--|-------|--|----------|----------|----------|--|
|     |  |       |  | <b>2</b> | <b>0</b> | <b>1</b> |  |
| DAY |  | MONTH |  | YEAR     |          |          |  |

**RESPONDENT IDENTIFICATION**

DISTRICT/METRO/SUBMETRO/MUNICIPALITY

COMMUNITY .....

CLUSTER NUMBER .....

HOUSEHOLD ID NUMBER .....

HOUSEHOLD LOCATION  
/DIRECTIONS

DESCRIPTION OF HOUSE/  
LANDMARKS

GPS COORDINATES

\_\_\_\_\_ Latitude \_\_\_\_\_ Longitude

**RESPONDENT ID NUMBER**

|  |  |  |  |  |  |  |  |  |  |
|--|--|--|--|--|--|--|--|--|--|
|  |  |  |  |  |  |  |  |  |  |
|--|--|--|--|--|--|--|--|--|--|

|  |  |  |
|--|--|--|
|  |  |  |
|  |  |  |
|  |  |  |
|  |  |  |

**RESPONDENT CONTACT INFORMATION**

FULL NAME (INCLUDING COMMON NAME) \_\_\_\_\_

PRIMARY PHONE NO. OF WOMAN \_\_\_\_\_

ALTERNATE PHONE NO. OF WOMAN \_\_\_\_\_

E-MAIL OF WOMAN \_\_\_\_\_

FULL NAME (INCLUDING COMMON NAME) OF FRIEND/RELATIVE \_\_\_\_\_

PHONE NO. OF FRIEND/RELATIVE \_\_\_\_\_

LOCATION/DIRECTIONS TO FRIEND/RELATIVE \_\_\_\_\_  
 \_\_\_\_\_  
 \_\_\_\_\_

**INTERVIEWER CONTACTS/VISITS**

|                               | 1     | 2     | 3     | FINAL CONTACT                                                                                                                                                                                  |  |  |  |  |  |  |  |  |
|-------------------------------|-------|-------|-------|------------------------------------------------------------------------------------------------------------------------------------------------------------------------------------------------|--|--|--|--|--|--|--|--|
| DATE                          | _____ | _____ | _____ | DAY<br><table border="1" style="display: inline-table; vertical-align: middle;"> <tr><td> </td><td> </td></tr> <tr><td> </td><td> </td></tr> </table>                                          |  |  |  |  |  |  |  |  |
|                               |       |       |       |                                                                                                                                                                                                |  |  |  |  |  |  |  |  |
|                               |       |       |       |                                                                                                                                                                                                |  |  |  |  |  |  |  |  |
| INTERVIEWER'S NAME            | _____ | _____ | _____ | MONTH<br><table border="1" style="display: inline-table; vertical-align: middle;"> <tr><td> </td><td> </td><td> </td></tr> <tr><td> </td><td> </td><td> </td></tr> </table>                    |  |  |  |  |  |  |  |  |
|                               |       |       |       |                                                                                                                                                                                                |  |  |  |  |  |  |  |  |
|                               |       |       |       |                                                                                                                                                                                                |  |  |  |  |  |  |  |  |
| RESULT*                       | _____ | _____ | _____ | YEAR<br><table border="1" style="display: inline-table; vertical-align: middle;"> <tr><td> </td><td> </td><td> </td><td> </td></tr> <tr><td> </td><td> </td><td> </td><td> </td></tr> </table> |  |  |  |  |  |  |  |  |
|                               |       |       |       |                                                                                                                                                                                                |  |  |  |  |  |  |  |  |
|                               |       |       |       |                                                                                                                                                                                                |  |  |  |  |  |  |  |  |
| NEXT CONTACT:<br>DATE<br>TIME | _____ | _____ | _____ | INT. NO.<br><table border="1" style="display: inline-table; vertical-align: middle;"> <tr><td> </td><td> </td><td> </td></tr> <tr><td> </td><td> </td><td> </td></tr> </table>                 |  |  |  |  |  |  |  |  |
|                               |       |       |       |                                                                                                                                                                                                |  |  |  |  |  |  |  |  |
|                               |       |       |       |                                                                                                                                                                                                |  |  |  |  |  |  |  |  |
|                               |       |       |       | RESULT*<br><table border="1" style="display: inline-table; vertical-align: middle;"> <tr><td> </td><td> </td></tr> <tr><td> </td><td> </td></tr> </table>                                      |  |  |  |  |  |  |  |  |
|                               |       |       |       |                                                                                                                                                                                                |  |  |  |  |  |  |  |  |
|                               |       |       |       |                                                                                                                                                                                                |  |  |  |  |  |  |  |  |
|                               |       |       |       | TOTAL NUMBER OF CONTACTS<br><table border="1" style="display: inline-table; vertical-align: middle;"> <tr><td> </td></tr> </table>                                                             |  |  |  |  |  |  |  |  |
|                               |       |       |       |                                                                                                                                                                                                |  |  |  |  |  |  |  |  |

\*RESULT CODES: 1 COMPLETED                      7 OTHER \_\_\_\_\_                      11 MOVED/MIGRATED  
 2 NOT AVAILABLE                                      SPECIFY                                      12 BOARDING SCHOOL  
 3 RESCHEDULED                                      8 CANNOT LOCATE                      13 DOES NOT EXIST  
 4 REFUSED                                              9 DECEASED  
 5 PARTLY COMPLETED                      # NOT ELIGIBLE  
 6 INCAPACITATED

LANGUAGE OF QUESTIONNAIRE\*\* 

|  |  |
|--|--|
|  |  |
|--|--|

      LANGUAGE OF INTERVIEW\*\* 

|  |  |
|--|--|
|  |  |
|--|--|

      NATIVE LANGUAGE OF RESPONDENT\*\* 

|  |  |
|--|--|
|  |  |
|--|--|

LANGUAGE OF QUESTIONNAIRE\*\* \_\_\_\_\_                      \*\*LANGUAGE CODES:  
 01 ENGLISH      02 GA                      03 ASANTI/TWI      04 EWE  
 05 OTHER: \_\_\_\_\_

PLEASE ENTER THE LOCATION OF INTERVIEW      HOME ..... 1  
 OTHER ..... 2

**INTRODUCTION**

In this survey I will ask you questions about your health and well-being. The questions in this survey usually take less 60 minutes. All of the answers you give will be confidential and will not be shared with anyone other than members of our research team that will analyze the information collected from all women together. You don't have to be in the survey, but we hope you will agree to answer the questions since your views are important. If I ask you any question you don't want to answer, just let me know and I will go on to the next question or you can stop the interview at any time.

| NO. | QUESTIONS AND FILTERS             | CODING CATEGORIES                                                                                                                                                                                                                                                                                                                                                                                                                                                                                                                                                                                                                                                                                                                                                                                                                                                                                                                                                                                                                                                                  | SKIP |  |  |  |  |  |  |  |  |  |  |  |  |  |  |  |  |
|-----|-----------------------------------|------------------------------------------------------------------------------------------------------------------------------------------------------------------------------------------------------------------------------------------------------------------------------------------------------------------------------------------------------------------------------------------------------------------------------------------------------------------------------------------------------------------------------------------------------------------------------------------------------------------------------------------------------------------------------------------------------------------------------------------------------------------------------------------------------------------------------------------------------------------------------------------------------------------------------------------------------------------------------------------------------------------------------------------------------------------------------------|------|--|--|--|--|--|--|--|--|--|--|--|--|--|--|--|--|
| 001 | RECORD THE DATE OF THE INTERVIEW. | DAY ..... <table border="1" style="display: inline-table; vertical-align: middle;"><tr><td style="width: 20px; height: 20px;"></td><td style="width: 20px; height: 20px;"></td></tr><tr><td style="width: 20px; height: 20px;"></td><td style="width: 20px; height: 20px;"></td></tr></table><br>MONTH ..... <table border="1" style="display: inline-table; vertical-align: middle;"><tr><td style="width: 20px; height: 20px;"></td><td style="width: 20px; height: 20px;"></td></tr><tr><td style="width: 20px; height: 20px;"></td><td style="width: 20px; height: 20px;"></td></tr></table><br>YEAR ..... <table border="1" style="display: inline-table; vertical-align: middle;"><tr><td style="width: 20px; height: 20px;"></td><td style="width: 20px; height: 20px;"></td><td style="width: 20px; height: 20px;"></td><td style="width: 20px; height: 20px;"></td></tr><tr><td style="width: 20px; height: 20px;"></td><td style="width: 20px; height: 20px;"></td><td style="width: 20px; height: 20px;"></td><td style="width: 20px; height: 20px;"></td></tr></table> |      |  |  |  |  |  |  |  |  |  |  |  |  |  |  |  |  |
|     |                                   |                                                                                                                                                                                                                                                                                                                                                                                                                                                                                                                                                                                                                                                                                                                                                                                                                                                                                                                                                                                                                                                                                    |      |  |  |  |  |  |  |  |  |  |  |  |  |  |  |  |  |
|     |                                   |                                                                                                                                                                                                                                                                                                                                                                                                                                                                                                                                                                                                                                                                                                                                                                                                                                                                                                                                                                                                                                                                                    |      |  |  |  |  |  |  |  |  |  |  |  |  |  |  |  |  |
|     |                                   |                                                                                                                                                                                                                                                                                                                                                                                                                                                                                                                                                                                                                                                                                                                                                                                                                                                                                                                                                                                                                                                                                    |      |  |  |  |  |  |  |  |  |  |  |  |  |  |  |  |  |
|     |                                   |                                                                                                                                                                                                                                                                                                                                                                                                                                                                                                                                                                                                                                                                                                                                                                                                                                                                                                                                                                                                                                                                                    |      |  |  |  |  |  |  |  |  |  |  |  |  |  |  |  |  |
|     |                                   |                                                                                                                                                                                                                                                                                                                                                                                                                                                                                                                                                                                                                                                                                                                                                                                                                                                                                                                                                                                                                                                                                    |      |  |  |  |  |  |  |  |  |  |  |  |  |  |  |  |  |
|     |                                   |                                                                                                                                                                                                                                                                                                                                                                                                                                                                                                                                                                                                                                                                                                                                                                                                                                                                                                                                                                                                                                                                                    |      |  |  |  |  |  |  |  |  |  |  |  |  |  |  |  |  |
| 002 | RECORD THE TIME INTERVIEW BEGINS. | HOURS ..... <table border="1" style="display: inline-table; vertical-align: middle;"><tr><td style="width: 20px; height: 20px;"></td><td style="width: 20px; height: 20px;"></td></tr><tr><td style="width: 20px; height: 20px;"></td><td style="width: 20px; height: 20px;"></td></tr></table><br>MINUTES ..... <table border="1" style="display: inline-table; vertical-align: middle;"><tr><td style="width: 20px; height: 20px;"></td><td style="width: 20px; height: 20px;"></td></tr><tr><td style="width: 20px; height: 20px;"></td><td style="width: 20px; height: 20px;"></td></tr></table>                                                                                                                                                                                                                                                                                                                                                                                                                                                                               |      |  |  |  |  |  |  |  |  |  |  |  |  |  |  |  |  |
|     |                                   |                                                                                                                                                                                                                                                                                                                                                                                                                                                                                                                                                                                                                                                                                                                                                                                                                                                                                                                                                                                                                                                                                    |      |  |  |  |  |  |  |  |  |  |  |  |  |  |  |  |  |
|     |                                   |                                                                                                                                                                                                                                                                                                                                                                                                                                                                                                                                                                                                                                                                                                                                                                                                                                                                                                                                                                                                                                                                                    |      |  |  |  |  |  |  |  |  |  |  |  |  |  |  |  |  |
|     |                                   |                                                                                                                                                                                                                                                                                                                                                                                                                                                                                                                                                                                                                                                                                                                                                                                                                                                                                                                                                                                                                                                                                    |      |  |  |  |  |  |  |  |  |  |  |  |  |  |  |  |  |
|     |                                   |                                                                                                                                                                                                                                                                                                                                                                                                                                                                                                                                                                                                                                                                                                                                                                                                                                                                                                                                                                                                                                                                                    |      |  |  |  |  |  |  |  |  |  |  |  |  |  |  |  |  |

**1. HOUSEHOLD ROSTER**

| LINE NO. | USUAL RESIDENTS NAMES                                                                                                                                                                                                                                                                                                                                  | RELATIONSHIP TO WOMAN RESPONDENT                                                                                           | SEX                       | YEAR OF BIRTH                 | AGE                                          | IF AGE 15 OR OLDER                                                                                                                                                                                | IF AGE 5 YEARS OR OLDER          |                                                                                                                                                             | IF AGE 5-30 YEARS                                               |                                                                                            | IF AGE 0-4 YEARS                                                                                                                                                                                                                                        |
|----------|--------------------------------------------------------------------------------------------------------------------------------------------------------------------------------------------------------------------------------------------------------------------------------------------------------------------------------------------------------|----------------------------------------------------------------------------------------------------------------------------|---------------------------|-------------------------------|----------------------------------------------|---------------------------------------------------------------------------------------------------------------------------------------------------------------------------------------------------|----------------------------------|-------------------------------------------------------------------------------------------------------------------------------------------------------------|-----------------------------------------------------------------|--------------------------------------------------------------------------------------------|---------------------------------------------------------------------------------------------------------------------------------------------------------------------------------------------------------------------------------------------------------|
|          |                                                                                                                                                                                                                                                                                                                                                        |                                                                                                                            |                           |                               |                                              |                                                                                                                                                                                                   | EVER ATTENDED SCHOOL             | CURRENT/RECENT SCHOOL ATTENDANCE                                                                                                                            | BIRTH REGISTRATION                                              |                                                                                            |                                                                                                                                                                                                                                                         |
| 101      | 102                                                                                                                                                                                                                                                                                                                                                    | 103                                                                                                                        | 104                       | 105                           | 106                                          | 107                                                                                                                                                                                               | 108                              | 109                                                                                                                                                         | 110                                                             | 111                                                                                        | 112                                                                                                                                                                                                                                                     |
|          | Please give me the names of the persons who usually live in your household, starting with yourself.<br><br>AFTER LISTING THE NAMES AND RECORDING THE RELATIONSHIP AND SEX FOR EACH PERSON, ASK QUESTION 113A AT THE END OF THE LISTING SECTION TO BE SURE THAT THE LISTING IS COMPLETE.<br><br>THEN ASK APPROPRIATE QUESTIONS 105-112 FOR EACH PERSON. | What is the relationship of (NAME) to you?<br><br>SEE CODES BELOW.<br><br>PROMPT: "What do you call them? She/he is my..." | Is (NAME) male or female? | In what year was (NAME) born? | How old was (NAME) on his/her last birthday? | What is (NAME)'s current marital status?<br><br>1 = MARRIED OR LIVING TOGETHER AS IF MARRIED<br>2 = DIVORCED/SEPARATED<br>3 = WIDOWED<br>4 = NEVER-MARRIED OR NEVER LIVED TOGETHER<br>9 = REFUSED | Has (NAME) ever attended school? | What is the highest level of school (NAME) has attended?<br><br>SEE CODES BELOW.<br><br>What is the highest grade (NAME) completed?<br><br>SEE CODES BELOW. | Change to Is (NAME) attending school during the 2017-2018 year? | During this school year, what level and grade is (NAME) attending?<br><br>SEE CODES BELOW. | Does (NAME) have a birth certificate?<br><br>IF NO, PROBE: Has (NAME)'s birth ever been registered with the civil authority?<br><br>1 = HAS CERTIFICATE OBSERVED<br>2 = HAS CERTIFICATE NOT OBSERVED<br>3 = REGISTERED<br>4 = NEITHER<br>8 = DON'T KNOW |
| 01       |                                                                                                                                                                                                                                                                                                                                                        | <input type="text"/>                                                                                                       | M F<br>1 2                | YEAR<br><input type="text"/>  | IN YEARS<br><input type="text"/>             | <input type="text"/>                                                                                                                                                                              | Y N<br>1<br>↓<br>NEXT LINE       | LEVEL GRADE<br><input type="text"/> <input type="text"/> ↓                                                                                                  | Y N<br>1 2<br>↓<br>NEXT LINE                                    | LEVEL GRADE<br><input type="text"/> <input type="text"/> ↓                                 | <input type="text"/>                                                                                                                                                                                                                                    |
| 02       |                                                                                                                                                                                                                                                                                                                                                        | <input type="text"/>                                                                                                       | 1 2                       | <input type="text"/>          | <input type="text"/>                         | <input type="text"/>                                                                                                                                                                              | 1<br>↓<br>NEXT LINE              | <input type="text"/> <input type="text"/> ↓                                                                                                                 | 1 2<br>↓<br>NEXT LINE                                           | <input type="text"/> <input type="text"/> ↓                                                | <input type="text"/>                                                                                                                                                                                                                                    |
| 03       |                                                                                                                                                                                                                                                                                                                                                        | <input type="text"/>                                                                                                       | 1 2                       | <input type="text"/>          | <input type="text"/>                         | <input type="text"/>                                                                                                                                                                              | 1<br>↓<br>NEXT LINE              | <input type="text"/> <input type="text"/> ↓                                                                                                                 | 1 2<br>↓<br>NEXT LINE                                           | <input type="text"/> <input type="text"/> ↓                                                | <input type="text"/>                                                                                                                                                                                                                                    |
| 04       |                                                                                                                                                                                                                                                                                                                                                        | <input type="text"/>                                                                                                       | 1 2                       | <input type="text"/>          | <input type="text"/>                         | <input type="text"/>                                                                                                                                                                              | 1<br>↓<br>NEXT LINE              | <input type="text"/> <input type="text"/> ↓                                                                                                                 | 1 2<br>↓<br>NEXT LINE                                           | <input type="text"/> <input type="text"/> ↓                                                | <input type="text"/>                                                                                                                                                                                                                                    |
| 05       |                                                                                                                                                                                                                                                                                                                                                        | <input type="text"/>                                                                                                       | 1 2                       | <input type="text"/>          | <input type="text"/>                         | <input type="text"/>                                                                                                                                                                              | 1<br>↓<br>NEXT LINE              | <input type="text"/> <input type="text"/> ↓                                                                                                                 | 1 2<br>↓<br>NEXT LINE                                           | <input type="text"/> <input type="text"/> ↓                                                | <input type="text"/>                                                                                                                                                                                                                                    |
| 06       |                                                                                                                                                                                                                                                                                                                                                        | <input type="text"/>                                                                                                       | 1 2                       | <input type="text"/>          | <input type="text"/>                         | <input type="text"/>                                                                                                                                                                              | 1<br>↓<br>NEXT LINE              | <input type="text"/> <input type="text"/> ↓                                                                                                                 | 1 2<br>↓<br>NEXT LINE                                           | <input type="text"/> <input type="text"/> ↓                                                | <input type="text"/>                                                                                                                                                                                                                                    |
| 07       |                                                                                                                                                                                                                                                                                                                                                        | <input type="text"/>                                                                                                       | 1 2                       | <input type="text"/>          | <input type="text"/>                         | <input type="text"/>                                                                                                                                                                              | 1<br>↓<br>NEXT LINE              | <input type="text"/> <input type="text"/> ↓                                                                                                                 | 1 2<br>↓<br>NEXT LINE                                           | <input type="text"/> <input type="text"/> ↓                                                | <input type="text"/>                                                                                                                                                                                                                                    |
| 08       |                                                                                                                                                                                                                                                                                                                                                        | <input type="text"/>                                                                                                       | 1 2                       | <input type="text"/>          | <input type="text"/>                         | <input type="text"/>                                                                                                                                                                              | 1<br>↓<br>NEXT LINE              | <input type="text"/> <input type="text"/> ↓                                                                                                                 | 1 2<br>↓<br>NEXT LINE                                           | <input type="text"/> <input type="text"/> ↓                                                | <input type="text"/>                                                                                                                                                                                                                                    |
| 09       |                                                                                                                                                                                                                                                                                                                                                        | <input type="text"/>                                                                                                       | 1 2                       | <input type="text"/>          | <input type="text"/>                         | <input type="text"/>                                                                                                                                                                              | 1<br>↓<br>NEXT LINE              | <input type="text"/> <input type="text"/> ↓                                                                                                                 | 1 2<br>↓<br>NEXT LINE                                           | <input type="text"/> <input type="text"/> ↓                                                | <input type="text"/>                                                                                                                                                                                                                                    |
| 10       |                                                                                                                                                                                                                                                                                                                                                        | <input type="text"/>                                                                                                       | 1 2                       | <input type="text"/>          | <input type="text"/>                         | <input type="text"/>                                                                                                                                                                              | 1<br>↓<br>NEXT LINE              | <input type="text"/> <input type="text"/> ↓                                                                                                                 | 1 2<br>↓<br>NEXT LINE                                           | <input type="text"/> <input type="text"/> ↓                                                | <input type="text"/>                                                                                                                                                                                                                                    |

|                                                           |                                   |                 |                                             |                   |                |                |                              |  |  |  |                       |  |  |
|-----------------------------------------------------------|-----------------------------------|-----------------|---------------------------------------------|-------------------|----------------|----------------|------------------------------|--|--|--|-----------------------|--|--|
| <b>CODES FOR Q. 103: RELATIONSHIP TO WOMAN RESPONDENT</b> |                                   |                 | <b>CODES FOR Qs. 109 AND 111: EDUCATION</b> |                   |                |                |                              |  |  |  |                       |  |  |
| 01 = SELF                                                 | 08 = BROTHER OR SISTER            | 16 = COUSIN     | <b>LEVEL</b>                                | <b>GRADE</b>      |                |                |                              |  |  |  |                       |  |  |
| 02 = HUSBAND                                              | 09 = OTHER RELATIVE               | 88 = DON'T KNOW | 0 = NONE                                    | 80 = Pre-school   | 06 = P6        | 13 = JSS1/JHS3 | 21 = S3                      |  |  |  | 28 = Teacher Training |  |  |
| 03 = SON OR DAUGHTER                                      | 10 = ADOPTED/FOSTER/STEPCHILD     | 99 = REFUSE     | 1 = PRIMARY                                 | 00 = Kindergarten | 07 = M1        | 14 = SS1/SHS1  | 22 = S4                      |  |  |  | 29 = Nursing          |  |  |
| 04 = SON-IN-LAW OR DAUGHTER-IN-LAW                        | 11 = NOT RELATED                  |                 | 2 = MIDDLE/JHS/JSS                          | 01 = P1           | 08 = M2        | 15 = SS2/SHS2  | 23 = S5                      |  |  |  | 30 = Polytechnic      |  |  |
| 05 = GRANDCHILD                                           | 12 = GRANDPARENT                  |                 | 3 = SECONDARY                               | 02 = P2           | 09 = M3        | 16 = SS3/SHS3  |                              |  |  |  | 31 = University       |  |  |
| 06 = PARENT                                               | 13 = BROTHER IN LAW/SISTER IN LAW |                 | 4 = HIGHER                                  | 03 = P3           | 10 = M4        | 18 = SHS4      | 25 = L6                      |  |  |  | 32 = Other            |  |  |
| 07 = PARENT-IN-LAW                                        | 14 = NIECE/NEPHEW                 |                 | 8 = DON'T KNOW                              | 04 = P4           | 11 = JSS1/JHS1 | 19 = S1        | 26 = U6                      |  |  |  | 88 = Don't know       |  |  |
|                                                           | 15 = AUNT/UNCLE                   |                 | 9 = REFUSED                                 | 05 = P5           | 12 = JSS1/JHS2 | 20 = S2        | 27 = Voc/Tech/Agric/Computer |  |  |  | 99 = Refused          |  |  |

|    |  |                          |            |                                                                                                             |                                                               |                          |                         |                                                                  |                           |                                                                  |                          |
|----|--|--------------------------|------------|-------------------------------------------------------------------------------------------------------------|---------------------------------------------------------------|--------------------------|-------------------------|------------------------------------------------------------------|---------------------------|------------------------------------------------------------------|--------------------------|
| 11 |  | <input type="checkbox"/> | M F<br>1 2 | YEAR<br><input type="checkbox"/> <input type="checkbox"/> <input type="checkbox"/> <input type="checkbox"/> | IN YEARS<br><input type="checkbox"/> <input type="checkbox"/> | <input type="checkbox"/> | Y N<br>1<br>NEXT LINE ↓ | LEVEL GRADE<br><input type="checkbox"/> <input type="checkbox"/> | Y N<br>1 2<br>NEXT LINE ↓ | LEVEL GRADE<br><input type="checkbox"/> <input type="checkbox"/> | <input type="checkbox"/> |
| 12 |  | <input type="checkbox"/> | 1 2        | <input type="checkbox"/> <input type="checkbox"/> <input type="checkbox"/> <input type="checkbox"/>         | <input type="checkbox"/> <input type="checkbox"/>             | <input type="checkbox"/> | 1<br>NEXT LINE ↓        | <input type="checkbox"/> <input type="checkbox"/>                | 1 2<br>NEXT LINE ↓        | <input type="checkbox"/> <input type="checkbox"/>                | <input type="checkbox"/> |
| 13 |  | <input type="checkbox"/> | 1 2        | <input type="checkbox"/> <input type="checkbox"/> <input type="checkbox"/> <input type="checkbox"/>         | <input type="checkbox"/> <input type="checkbox"/>             | <input type="checkbox"/> | 1<br>NEXT LINE ↓        | <input type="checkbox"/> <input type="checkbox"/>                | 1 2<br>NEXT LINE ↓        | <input type="checkbox"/> <input type="checkbox"/>                | <input type="checkbox"/> |
| 14 |  | <input type="checkbox"/> | 1 2        | <input type="checkbox"/> <input type="checkbox"/> <input type="checkbox"/> <input type="checkbox"/>         | <input type="checkbox"/> <input type="checkbox"/>             | <input type="checkbox"/> | 1<br>NEXT LINE ↓        | <input type="checkbox"/> <input type="checkbox"/>                | 1 2<br>NEXT LINE ↓        | <input type="checkbox"/> <input type="checkbox"/>                | <input type="checkbox"/> |
| 15 |  | <input type="checkbox"/> | 1 2        | <input type="checkbox"/> <input type="checkbox"/> <input type="checkbox"/> <input type="checkbox"/>         | <input type="checkbox"/> <input type="checkbox"/>             | <input type="checkbox"/> | 1<br>NEXT LINE ↓        | <input type="checkbox"/> <input type="checkbox"/>                | 1 2<br>NEXT LINE ↓        | <input type="checkbox"/> <input type="checkbox"/>                | <input type="checkbox"/> |
| 16 |  | <input type="checkbox"/> | 1 2        | <input type="checkbox"/> <input type="checkbox"/> <input type="checkbox"/> <input type="checkbox"/>         | <input type="checkbox"/> <input type="checkbox"/>             | <input type="checkbox"/> | 1<br>NEXT LINE ↓        | <input type="checkbox"/> <input type="checkbox"/>                | 1 2<br>NEXT LINE ↓        | <input type="checkbox"/> <input type="checkbox"/>                | <input type="checkbox"/> |
| 17 |  | <input type="checkbox"/> | 1 2        | <input type="checkbox"/> <input type="checkbox"/> <input type="checkbox"/> <input type="checkbox"/>         | <input type="checkbox"/> <input type="checkbox"/>             | <input type="checkbox"/> | 1<br>NEXT LINE ↓        | <input type="checkbox"/> <input type="checkbox"/>                | 1 2<br>NEXT LINE ↓        | <input type="checkbox"/> <input type="checkbox"/>                | <input type="checkbox"/> |
| 18 |  | <input type="checkbox"/> | 1 2        | <input type="checkbox"/> <input type="checkbox"/> <input type="checkbox"/> <input type="checkbox"/>         | <input type="checkbox"/> <input type="checkbox"/>             | <input type="checkbox"/> | 1<br>NEXT LINE ↓        | <input type="checkbox"/> <input type="checkbox"/>                | 1 2<br>NEXT LINE ↓        | <input type="checkbox"/> <input type="checkbox"/>                | <input type="checkbox"/> |
| 19 |  | <input type="checkbox"/> | 1 2        | <input type="checkbox"/> <input type="checkbox"/> <input type="checkbox"/> <input type="checkbox"/>         | <input type="checkbox"/> <input type="checkbox"/>             | <input type="checkbox"/> | 1<br>NEXT LINE ↓        | <input type="checkbox"/> <input type="checkbox"/>                | 1 2<br>NEXT LINE ↓        | <input type="checkbox"/> <input type="checkbox"/>                | <input type="checkbox"/> |
| 20 |  | <input type="checkbox"/> | 1 2        | <input type="checkbox"/> <input type="checkbox"/> <input type="checkbox"/> <input type="checkbox"/>         | <input type="checkbox"/> <input type="checkbox"/>             | <input type="checkbox"/> | 1<br>NEXT LINE ↓        | <input type="checkbox"/> <input type="checkbox"/>                | 1 2<br>NEXT LINE ↓        | <input type="checkbox"/> <input type="checkbox"/>                | <input type="checkbox"/> |

TICK HERE IF CONTINUATION SHEET USED

113A) Just to make sure that I have a complete listing: are there any other persons such as small children or infants that we have not listed?

YES  TO TABLE NO

**2. HOUSEHOLD CHARACTERISTICS**

| NO.                     | QUESTIONS AND FILTERS                                                                                                                   | CODING CATEGORIES                                                                                                                                                                                                                                                                                                                                                                                                                                                                                                                                                                                                                                                                                                                                                                                                                                                                                                                                                                                                                                                                                                                                                                                                                                                                                                                                                                                                                                                                  | SKIP  |     |    |    |    |                     |   |   |    |    |                    |   |   |    |    |                    |   |   |    |    |                    |   |   |    |    |                         |                      |                      |    |    |                      |   |   |    |    |                 |   |   |    |    |                 |   |   |    |    |             |   |   |    |    |               |   |   |    |    |                    |   |   |    |    |                    |   |   |    |    |                 |   |   |    |    |                   |   |   |    |    |                |   |   |    |    |  |
|-------------------------|-----------------------------------------------------------------------------------------------------------------------------------------|------------------------------------------------------------------------------------------------------------------------------------------------------------------------------------------------------------------------------------------------------------------------------------------------------------------------------------------------------------------------------------------------------------------------------------------------------------------------------------------------------------------------------------------------------------------------------------------------------------------------------------------------------------------------------------------------------------------------------------------------------------------------------------------------------------------------------------------------------------------------------------------------------------------------------------------------------------------------------------------------------------------------------------------------------------------------------------------------------------------------------------------------------------------------------------------------------------------------------------------------------------------------------------------------------------------------------------------------------------------------------------------------------------------------------------------------------------------------------------|-------|-----|----|----|----|---------------------|---|---|----|----|--------------------|---|---|----|----|--------------------|---|---|----|----|--------------------|---|---|----|----|-------------------------|----------------------|----------------------|----|----|----------------------|---|---|----|----|-----------------|---|---|----|----|-----------------|---|---|----|----|-------------|---|---|----|----|---------------|---|---|----|----|--------------------|---|---|----|----|--------------------|---|---|----|----|-----------------|---|---|----|----|-------------------|---|---|----|----|----------------|---|---|----|----|--|
| 201                     | Now I would like to ask you questions about your household.<br>What is the main source of drinking water for members of your household? | PIPED WATER ..... 1<br>WELL OR BOREHOLE ..... 2<br>TANKER TRUCK/CART ..... 3<br>RAIN/SURFACE WATER (RIVER/DAM) ..... 4<br>BOTTLED/SACHET WATER ..... 5<br>OTHER _____ 96<br>(SPECIFY)<br>REFUSED ..... 99                                                                                                                                                                                                                                                                                                                                                                                                                                                                                                                                                                                                                                                                                                                                                                                                                                                                                                                                                                                                                                                                                                                                                                                                                                                                          |       |     |    |    |    |                     |   |   |    |    |                    |   |   |    |    |                    |   |   |    |    |                    |   |   |    |    |                         |                      |                      |    |    |                      |   |   |    |    |                 |   |   |    |    |                 |   |   |    |    |             |   |   |    |    |               |   |   |    |    |                    |   |   |    |    |                    |   |   |    |    |                 |   |   |    |    |                   |   |   |    |    |                |   |   |    |    |  |
| 202                     | What kind of toilet facility do members of your household usually use?                                                                  | FLUSH OR POUR FLUSH TOILET ..... 1<br>PIT LATRINE ..... 2<br>BUCKET TOILET ..... 3<br>PUBLIC TOILET (KVIP) ..... 4<br>NO FACILITY/BUSH/FIELD/S ..... 5<br>OTHER _____ 96<br>(SPECIFY)<br>REFUSED ..... 99                                                                                                                                                                                                                                                                                                                                                                                                                                                                                                                                                                                                                                                                                                                                                                                                                                                                                                                                                                                                                                                                                                                                                                                                                                                                          | → 205 |     |    |    |    |                     |   |   |    |    |                    |   |   |    |    |                    |   |   |    |    |                    |   |   |    |    |                         |                      |                      |    |    |                      |   |   |    |    |                 |   |   |    |    |                 |   |   |    |    |             |   |   |    |    |               |   |   |    |    |                    |   |   |    |    |                    |   |   |    |    |                 |   |   |    |    |                   |   |   |    |    |                |   |   |    |    |  |
| 203                     | Do you share this toilet facility with other households?                                                                                | YES ..... 1<br>NO ..... 2<br>REFUSED ..... 99                                                                                                                                                                                                                                                                                                                                                                                                                                                                                                                                                                                                                                                                                                                                                                                                                                                                                                                                                                                                                                                                                                                                                                                                                                                                                                                                                                                                                                      | → 205 |     |    |    |    |                     |   |   |    |    |                    |   |   |    |    |                    |   |   |    |    |                    |   |   |    |    |                         |                      |                      |    |    |                      |   |   |    |    |                 |   |   |    |    |                 |   |   |    |    |             |   |   |    |    |               |   |   |    |    |                    |   |   |    |    |                    |   |   |    |    |                 |   |   |    |    |                   |   |   |    |    |                |   |   |    |    |  |
| 204                     | How many households use this toilet facility (including your own)?                                                                      | NO. OF HOUSEHOLDS ..... <input type="text"/> <input type="text"/><br>DON'T KNOW ..... 88<br>REFUSED ..... 99                                                                                                                                                                                                                                                                                                                                                                                                                                                                                                                                                                                                                                                                                                                                                                                                                                                                                                                                                                                                                                                                                                                                                                                                                                                                                                                                                                       |       |     |    |    |    |                     |   |   |    |    |                    |   |   |    |    |                    |   |   |    |    |                    |   |   |    |    |                         |                      |                      |    |    |                      |   |   |    |    |                 |   |   |    |    |                 |   |   |    |    |             |   |   |    |    |               |   |   |    |    |                    |   |   |    |    |                    |   |   |    |    |                 |   |   |    |    |                   |   |   |    |    |                |   |   |    |    |  |
| 205                     | Does your household have:                                                                                                               | <table border="0"> <thead> <tr> <th></th> <th>YES</th> <th>NO</th> <th>DK</th> <th>RF</th> </tr> </thead> <tbody> <tr> <td>1 ELECTRICITY .....</td> <td>1</td> <td>2</td> <td>88</td> <td>99</td> </tr> <tr> <td>2 WALL CLOCK .....</td> <td>1</td> <td>2</td> <td>88</td> <td>99</td> </tr> <tr> <td>3 TELEVISION .....</td> <td>1</td> <td>2</td> <td>88</td> <td>99</td> </tr> <tr> <td>4 CELL PHONE .....</td> <td>1</td> <td>2</td> <td>88</td> <td>99</td> </tr> <tr> <td>5 NUMBER OF CELL PHONES</td> <td><input type="text"/></td> <td><input type="text"/></td> <td>88</td> <td>99</td> </tr> <tr> <td>6 REFRIGERATOR .....</td> <td>1</td> <td>2</td> <td>88</td> <td>99</td> </tr> <tr> <td>7 DVD VCR .....</td> <td>1</td> <td>2</td> <td>88</td> <td>99</td> </tr> <tr> <td>8 CABINET .....</td> <td>1</td> <td>2</td> <td>88</td> <td>99</td> </tr> <tr> <td>9 MP3 .....</td> <td>1</td> <td>2</td> <td>88</td> <td>99</td> </tr> <tr> <td>10 IRON .....</td> <td>1</td> <td>2</td> <td>88</td> <td>99</td> </tr> <tr> <td>11 MICROWAVE .....</td> <td>1</td> <td>2</td> <td>88</td> <td>99</td> </tr> <tr> <td>12 RICECOOKER.....</td> <td>1</td> <td>2</td> <td>88</td> <td>99</td> </tr> <tr> <td>13 DECODER.....</td> <td>1</td> <td>2</td> <td>88</td> <td>99</td> </tr> <tr> <td>14 COMPUTER .....</td> <td>1</td> <td>2</td> <td>88</td> <td>99</td> </tr> <tr> <td>15 WATCH .....</td> <td>1</td> <td>2</td> <td>88</td> <td>99</td> </tr> </tbody> </table> |       | YES | NO | DK | RF | 1 ELECTRICITY ..... | 1 | 2 | 88 | 99 | 2 WALL CLOCK ..... | 1 | 2 | 88 | 99 | 3 TELEVISION ..... | 1 | 2 | 88 | 99 | 4 CELL PHONE ..... | 1 | 2 | 88 | 99 | 5 NUMBER OF CELL PHONES | <input type="text"/> | <input type="text"/> | 88 | 99 | 6 REFRIGERATOR ..... | 1 | 2 | 88 | 99 | 7 DVD VCR ..... | 1 | 2 | 88 | 99 | 8 CABINET ..... | 1 | 2 | 88 | 99 | 9 MP3 ..... | 1 | 2 | 88 | 99 | 10 IRON ..... | 1 | 2 | 88 | 99 | 11 MICROWAVE ..... | 1 | 2 | 88 | 99 | 12 RICECOOKER..... | 1 | 2 | 88 | 99 | 13 DECODER..... | 1 | 2 | 88 | 99 | 14 COMPUTER ..... | 1 | 2 | 88 | 99 | 15 WATCH ..... | 1 | 2 | 88 | 99 |  |
|                         | YES                                                                                                                                     | NO                                                                                                                                                                                                                                                                                                                                                                                                                                                                                                                                                                                                                                                                                                                                                                                                                                                                                                                                                                                                                                                                                                                                                                                                                                                                                                                                                                                                                                                                                 | DK    | RF  |    |    |    |                     |   |   |    |    |                    |   |   |    |    |                    |   |   |    |    |                    |   |   |    |    |                         |                      |                      |    |    |                      |   |   |    |    |                 |   |   |    |    |                 |   |   |    |    |             |   |   |    |    |               |   |   |    |    |                    |   |   |    |    |                    |   |   |    |    |                 |   |   |    |    |                   |   |   |    |    |                |   |   |    |    |  |
| 1 ELECTRICITY .....     | 1                                                                                                                                       | 2                                                                                                                                                                                                                                                                                                                                                                                                                                                                                                                                                                                                                                                                                                                                                                                                                                                                                                                                                                                                                                                                                                                                                                                                                                                                                                                                                                                                                                                                                  | 88    | 99  |    |    |    |                     |   |   |    |    |                    |   |   |    |    |                    |   |   |    |    |                    |   |   |    |    |                         |                      |                      |    |    |                      |   |   |    |    |                 |   |   |    |    |                 |   |   |    |    |             |   |   |    |    |               |   |   |    |    |                    |   |   |    |    |                    |   |   |    |    |                 |   |   |    |    |                   |   |   |    |    |                |   |   |    |    |  |
| 2 WALL CLOCK .....      | 1                                                                                                                                       | 2                                                                                                                                                                                                                                                                                                                                                                                                                                                                                                                                                                                                                                                                                                                                                                                                                                                                                                                                                                                                                                                                                                                                                                                                                                                                                                                                                                                                                                                                                  | 88    | 99  |    |    |    |                     |   |   |    |    |                    |   |   |    |    |                    |   |   |    |    |                    |   |   |    |    |                         |                      |                      |    |    |                      |   |   |    |    |                 |   |   |    |    |                 |   |   |    |    |             |   |   |    |    |               |   |   |    |    |                    |   |   |    |    |                    |   |   |    |    |                 |   |   |    |    |                   |   |   |    |    |                |   |   |    |    |  |
| 3 TELEVISION .....      | 1                                                                                                                                       | 2                                                                                                                                                                                                                                                                                                                                                                                                                                                                                                                                                                                                                                                                                                                                                                                                                                                                                                                                                                                                                                                                                                                                                                                                                                                                                                                                                                                                                                                                                  | 88    | 99  |    |    |    |                     |   |   |    |    |                    |   |   |    |    |                    |   |   |    |    |                    |   |   |    |    |                         |                      |                      |    |    |                      |   |   |    |    |                 |   |   |    |    |                 |   |   |    |    |             |   |   |    |    |               |   |   |    |    |                    |   |   |    |    |                    |   |   |    |    |                 |   |   |    |    |                   |   |   |    |    |                |   |   |    |    |  |
| 4 CELL PHONE .....      | 1                                                                                                                                       | 2                                                                                                                                                                                                                                                                                                                                                                                                                                                                                                                                                                                                                                                                                                                                                                                                                                                                                                                                                                                                                                                                                                                                                                                                                                                                                                                                                                                                                                                                                  | 88    | 99  |    |    |    |                     |   |   |    |    |                    |   |   |    |    |                    |   |   |    |    |                    |   |   |    |    |                         |                      |                      |    |    |                      |   |   |    |    |                 |   |   |    |    |                 |   |   |    |    |             |   |   |    |    |               |   |   |    |    |                    |   |   |    |    |                    |   |   |    |    |                 |   |   |    |    |                   |   |   |    |    |                |   |   |    |    |  |
| 5 NUMBER OF CELL PHONES | <input type="text"/>                                                                                                                    | <input type="text"/>                                                                                                                                                                                                                                                                                                                                                                                                                                                                                                                                                                                                                                                                                                                                                                                                                                                                                                                                                                                                                                                                                                                                                                                                                                                                                                                                                                                                                                                               | 88    | 99  |    |    |    |                     |   |   |    |    |                    |   |   |    |    |                    |   |   |    |    |                    |   |   |    |    |                         |                      |                      |    |    |                      |   |   |    |    |                 |   |   |    |    |                 |   |   |    |    |             |   |   |    |    |               |   |   |    |    |                    |   |   |    |    |                    |   |   |    |    |                 |   |   |    |    |                   |   |   |    |    |                |   |   |    |    |  |
| 6 REFRIGERATOR .....    | 1                                                                                                                                       | 2                                                                                                                                                                                                                                                                                                                                                                                                                                                                                                                                                                                                                                                                                                                                                                                                                                                                                                                                                                                                                                                                                                                                                                                                                                                                                                                                                                                                                                                                                  | 88    | 99  |    |    |    |                     |   |   |    |    |                    |   |   |    |    |                    |   |   |    |    |                    |   |   |    |    |                         |                      |                      |    |    |                      |   |   |    |    |                 |   |   |    |    |                 |   |   |    |    |             |   |   |    |    |               |   |   |    |    |                    |   |   |    |    |                    |   |   |    |    |                 |   |   |    |    |                   |   |   |    |    |                |   |   |    |    |  |
| 7 DVD VCR .....         | 1                                                                                                                                       | 2                                                                                                                                                                                                                                                                                                                                                                                                                                                                                                                                                                                                                                                                                                                                                                                                                                                                                                                                                                                                                                                                                                                                                                                                                                                                                                                                                                                                                                                                                  | 88    | 99  |    |    |    |                     |   |   |    |    |                    |   |   |    |    |                    |   |   |    |    |                    |   |   |    |    |                         |                      |                      |    |    |                      |   |   |    |    |                 |   |   |    |    |                 |   |   |    |    |             |   |   |    |    |               |   |   |    |    |                    |   |   |    |    |                    |   |   |    |    |                 |   |   |    |    |                   |   |   |    |    |                |   |   |    |    |  |
| 8 CABINET .....         | 1                                                                                                                                       | 2                                                                                                                                                                                                                                                                                                                                                                                                                                                                                                                                                                                                                                                                                                                                                                                                                                                                                                                                                                                                                                                                                                                                                                                                                                                                                                                                                                                                                                                                                  | 88    | 99  |    |    |    |                     |   |   |    |    |                    |   |   |    |    |                    |   |   |    |    |                    |   |   |    |    |                         |                      |                      |    |    |                      |   |   |    |    |                 |   |   |    |    |                 |   |   |    |    |             |   |   |    |    |               |   |   |    |    |                    |   |   |    |    |                    |   |   |    |    |                 |   |   |    |    |                   |   |   |    |    |                |   |   |    |    |  |
| 9 MP3 .....             | 1                                                                                                                                       | 2                                                                                                                                                                                                                                                                                                                                                                                                                                                                                                                                                                                                                                                                                                                                                                                                                                                                                                                                                                                                                                                                                                                                                                                                                                                                                                                                                                                                                                                                                  | 88    | 99  |    |    |    |                     |   |   |    |    |                    |   |   |    |    |                    |   |   |    |    |                    |   |   |    |    |                         |                      |                      |    |    |                      |   |   |    |    |                 |   |   |    |    |                 |   |   |    |    |             |   |   |    |    |               |   |   |    |    |                    |   |   |    |    |                    |   |   |    |    |                 |   |   |    |    |                   |   |   |    |    |                |   |   |    |    |  |
| 10 IRON .....           | 1                                                                                                                                       | 2                                                                                                                                                                                                                                                                                                                                                                                                                                                                                                                                                                                                                                                                                                                                                                                                                                                                                                                                                                                                                                                                                                                                                                                                                                                                                                                                                                                                                                                                                  | 88    | 99  |    |    |    |                     |   |   |    |    |                    |   |   |    |    |                    |   |   |    |    |                    |   |   |    |    |                         |                      |                      |    |    |                      |   |   |    |    |                 |   |   |    |    |                 |   |   |    |    |             |   |   |    |    |               |   |   |    |    |                    |   |   |    |    |                    |   |   |    |    |                 |   |   |    |    |                   |   |   |    |    |                |   |   |    |    |  |
| 11 MICROWAVE .....      | 1                                                                                                                                       | 2                                                                                                                                                                                                                                                                                                                                                                                                                                                                                                                                                                                                                                                                                                                                                                                                                                                                                                                                                                                                                                                                                                                                                                                                                                                                                                                                                                                                                                                                                  | 88    | 99  |    |    |    |                     |   |   |    |    |                    |   |   |    |    |                    |   |   |    |    |                    |   |   |    |    |                         |                      |                      |    |    |                      |   |   |    |    |                 |   |   |    |    |                 |   |   |    |    |             |   |   |    |    |               |   |   |    |    |                    |   |   |    |    |                    |   |   |    |    |                 |   |   |    |    |                   |   |   |    |    |                |   |   |    |    |  |
| 12 RICECOOKER.....      | 1                                                                                                                                       | 2                                                                                                                                                                                                                                                                                                                                                                                                                                                                                                                                                                                                                                                                                                                                                                                                                                                                                                                                                                                                                                                                                                                                                                                                                                                                                                                                                                                                                                                                                  | 88    | 99  |    |    |    |                     |   |   |    |    |                    |   |   |    |    |                    |   |   |    |    |                    |   |   |    |    |                         |                      |                      |    |    |                      |   |   |    |    |                 |   |   |    |    |                 |   |   |    |    |             |   |   |    |    |               |   |   |    |    |                    |   |   |    |    |                    |   |   |    |    |                 |   |   |    |    |                   |   |   |    |    |                |   |   |    |    |  |
| 13 DECODER.....         | 1                                                                                                                                       | 2                                                                                                                                                                                                                                                                                                                                                                                                                                                                                                                                                                                                                                                                                                                                                                                                                                                                                                                                                                                                                                                                                                                                                                                                                                                                                                                                                                                                                                                                                  | 88    | 99  |    |    |    |                     |   |   |    |    |                    |   |   |    |    |                    |   |   |    |    |                    |   |   |    |    |                         |                      |                      |    |    |                      |   |   |    |    |                 |   |   |    |    |                 |   |   |    |    |             |   |   |    |    |               |   |   |    |    |                    |   |   |    |    |                    |   |   |    |    |                 |   |   |    |    |                   |   |   |    |    |                |   |   |    |    |  |
| 14 COMPUTER .....       | 1                                                                                                                                       | 2                                                                                                                                                                                                                                                                                                                                                                                                                                                                                                                                                                                                                                                                                                                                                                                                                                                                                                                                                                                                                                                                                                                                                                                                                                                                                                                                                                                                                                                                                  | 88    | 99  |    |    |    |                     |   |   |    |    |                    |   |   |    |    |                    |   |   |    |    |                    |   |   |    |    |                         |                      |                      |    |    |                      |   |   |    |    |                 |   |   |    |    |                 |   |   |    |    |             |   |   |    |    |               |   |   |    |    |                    |   |   |    |    |                    |   |   |    |    |                 |   |   |    |    |                   |   |   |    |    |                |   |   |    |    |  |
| 15 WATCH .....          | 1                                                                                                                                       | 2                                                                                                                                                                                                                                                                                                                                                                                                                                                                                                                                                                                                                                                                                                                                                                                                                                                                                                                                                                                                                                                                                                                                                                                                                                                                                                                                                                                                                                                                                  | 88    | 99  |    |    |    |                     |   |   |    |    |                    |   |   |    |    |                    |   |   |    |    |                    |   |   |    |    |                         |                      |                      |    |    |                      |   |   |    |    |                 |   |   |    |    |                 |   |   |    |    |             |   |   |    |    |               |   |   |    |    |                    |   |   |    |    |                    |   |   |    |    |                 |   |   |    |    |                   |   |   |    |    |                |   |   |    |    |  |
| 206                     | What type of fuel does your household mainly use for cooking?                                                                           | ELECTRICITY ..... 1<br>WOOD, CROP RESIDUE, SAWDUST,<br>OR ANIMAL WASTE ..... 2<br>KEROSENE OR CHARCOAL ..... 3<br>LPG/GAS ..... 4<br>NO FOOD COOKED<br>IN HOUSEHOLD ..... 95<br>OTHER _____ 96<br>(SPECIFY)<br>REFUSED ..... 99                                                                                                                                                                                                                                                                                                                                                                                                                                                                                                                                                                                                                                                                                                                                                                                                                                                                                                                                                                                                                                                                                                                                                                                                                                                    | → 209 |     |    |    |    |                     |   |   |    |    |                    |   |   |    |    |                    |   |   |    |    |                    |   |   |    |    |                         |                      |                      |    |    |                      |   |   |    |    |                 |   |   |    |    |                 |   |   |    |    |             |   |   |    |    |               |   |   |    |    |                    |   |   |    |    |                    |   |   |    |    |                 |   |   |    |    |                   |   |   |    |    |                |   |   |    |    |  |
| 207                     | Is the cooking usually done in the house, in a separate building, or outdoors?                                                          | IN THE HOUSE ..... 1<br>IN A SEPARATE BUILDING ..... 2<br>OUTDOORS ..... 3<br><br>OTHER _____ 6<br>(SPECIFY)<br>REFUSED ..... 99                                                                                                                                                                                                                                                                                                                                                                                                                                                                                                                                                                                                                                                                                                                                                                                                                                                                                                                                                                                                                                                                                                                                                                                                                                                                                                                                                   | → 209 |     |    |    |    |                     |   |   |    |    |                    |   |   |    |    |                    |   |   |    |    |                    |   |   |    |    |                         |                      |                      |    |    |                      |   |   |    |    |                 |   |   |    |    |                 |   |   |    |    |             |   |   |    |    |               |   |   |    |    |                    |   |   |    |    |                    |   |   |    |    |                 |   |   |    |    |                   |   |   |    |    |                |   |   |    |    |  |
| 208                     | Do you have a separate room which is used as a kitchen?                                                                                 | YES ..... 1<br>NO ..... 2<br>REFUSED ..... 99                                                                                                                                                                                                                                                                                                                                                                                                                                                                                                                                                                                                                                                                                                                                                                                                                                                                                                                                                                                                                                                                                                                                                                                                                                                                                                                                                                                                                                      |       |     |    |    |    |                     |   |   |    |    |                    |   |   |    |    |                    |   |   |    |    |                    |   |   |    |    |                         |                      |                      |    |    |                      |   |   |    |    |                 |   |   |    |    |                 |   |   |    |    |             |   |   |    |    |               |   |   |    |    |                    |   |   |    |    |                    |   |   |    |    |                 |   |   |    |    |                   |   |   |    |    |                |   |   |    |    |  |

|     |                                                                                                                                                                                         |                                                                                                                                                                                                                                                                                                        |       |
|-----|-----------------------------------------------------------------------------------------------------------------------------------------------------------------------------------------|--------------------------------------------------------------------------------------------------------------------------------------------------------------------------------------------------------------------------------------------------------------------------------------------------------|-------|
| 209 | MAIN MATERIAL OF THE FLOOR.<br>RECORD OBSERVATION, IF POSSIBLE<br>OR ENQUIRE WHEN OBSERVATION IS NOT POSSIBLE                                                                           | NATURAL FLOOR (EARTH OR DUNG) 1<br>RUDIMENTARY FLOOR (WOOD OR BAMOC 2<br>FINISHED FLOOR (CEMENT/CERAMIC/CAR 3<br><br>OTHER _____ 96<br>(SPECIFY)<br>NOT OBSERVED / NOT REPORTED 99                                                                                                                     |       |
| 210 | MAIN MATERIAL OF THE ROOF.<br>RECORD OBSERVATION, IF POSSIBLE<br>OR ENQUIRE WHEN OBSERVATION IS NOT POSSIBLE                                                                            | NATURAL ROOFING (NONE OR THATCH) 1<br>RUDIMENTARY ROOFING (CARDBOARD/W 2<br>FINISHED ROOFING (METAL/TILE/CERAMIC 3<br><br>OTHER _____ 96<br>(SPECIFY)<br>NOT OBSERVED / NOT REPORTED 99                                                                                                                |       |
| 211 | MAIN MATERIAL OF THE EXTERIOR WALLS.<br>RECORD OBSERVATION, IF POSSIBLE<br>OR ENQUIRE WHEN OBSERVATION IS NOT POSSIBLE                                                                  | NATURAL WALLS (CANE/PALM/TRUNKS/NC 1<br>RUDIMENTARY WALLS (MUD/PLASTER/WC 2<br>FINISHED WALLS (CEMENT/STONE/BRICK) 3<br><br>OTHER _____ 96<br>(SPECIFY)<br>NOT OBSERVED / NOT REPORTED 99                                                                                                              |       |
| 212 | How many rooms in this household are used for sleeping?                                                                                                                                 | ROOMS ..... <input type="text"/> <input type="text"/><br>NOT OBSERVED / NOT REPORTED 99                                                                                                                                                                                                                |       |
| 213 | Does any member of this household own:<br><br>A bicycle?<br>A motorcycle or motor scooter?<br>A motorking?<br>An animal-drawn cart (oxcart)?<br>A car or truck?<br>A boat with a motor? | YESNO DK RF<br>2 BICYCLE ..... 1 2 88 99<br>3 MOTORCYCLE/SCOOTER ..... 1 2 88 99<br>4 MOTORKING ..... 1 2 88 99<br>5 ANIMAL-DRAWN CART ..... 1 2 88 99<br>6 CAR/TRUCK ..... 1 2 88 99<br>7 BOAT WITH MOTOR ..... 1 2 88 99                                                                             |       |
| 214 | Does any member of this household own any agricultural land?                                                                                                                            | YES ..... 1<br>NO ..... 2<br>DON'T KNOW ..... 88<br>REFUSED ..... 99                                                                                                                                                                                                                                   | → 216 |
| 215 | How much agricultural land do members of this household own?<br><br>RECORD IN UNITS RESPONDENT USES                                                                                     | HECTARES ..... 1 <input type="text"/> <input type="text"/> . <input type="text"/><br>ACRES ..... 2 <input type="text"/> <input type="text"/> . <input type="text"/><br>PLOTS ..... 3 <input type="text"/> <input type="text"/> . <input type="text"/><br><br>DON'T KNOW ..... 998<br>REFUSED ..... 999 |       |
| 216 | Does any member of this household have a bank account?                                                                                                                                  | YES ..... 1<br>NO ..... 2<br>DON'T KNOW ..... 88<br>REFUSED ..... 99                                                                                                                                                                                                                                   |       |
| 217 | Does someone in your household own your home?                                                                                                                                           | YES ..... 1<br>NO ..... 2<br>REFUSED ..... 99                                                                                                                                                                                                                                                          |       |

**3. RESPONDENT'S BACKGROUND**

| NO.   | QUESTIONS AND FILTERS                                    | CODING CATEGORIES                                                                                                                                                                                                                                                                                                                                                                                                                                                                                                                                             | SKIP |
|-------|----------------------------------------------------------|---------------------------------------------------------------------------------------------------------------------------------------------------------------------------------------------------------------------------------------------------------------------------------------------------------------------------------------------------------------------------------------------------------------------------------------------------------------------------------------------------------------------------------------------------------------|------|
| 303   | In which region or country were you born?                | Western ..... 1<br>Central ..... 2<br>Greater Accra ..... 3<br>Volta ..... 4<br>Eastern ..... 5<br>Ashanti ..... 6<br>Brong Ahafo ..... 7<br>Northern ..... 8<br>Upper East ..... 9<br>Upper West ..... 10<br>Nigeria ..... 11<br>Liberia ..... 12<br>Sierra Leone ..... 13<br>Gambia ..... 14<br>Togo ..... 15<br>Burkina Faso ..... 16<br>Cote d'Ivoire ..... 17<br>Other ECOWAS state ..... 18<br>Africa other t ..... 19<br>Europe ..... 20<br>Americas ..... 21<br>Asia ..... 22<br>Oceania ..... 23<br>Other (not listed): ..... 96<br>Refused ..... 99 |      |
| 304   | For how long have you resided in this neighborhood/area? | MONTHS ..... <input type="text"/> <input type="text"/><br><br>YEARS ..... <input type="text"/> <input type="text"/><br><br>DON'T KNOW .. ..... 888<br>REFUSED ..... 999                                                                                                                                                                                                                                                                                                                                                                                       |      |
| 305   | What is your religion?                                   | CATHOLIC ..... 1<br>ANGLICAN ..... 2<br>METHODIST ..... 3<br>PRESBYTERIAN ..... 4<br>PENTECOSTAL/CHARISMA ..... 5<br>OTHER CHRISTIAN ..... 6<br>MOSLEM ..... 7<br>TRADITIONAL/SPIRITUALIS ..... 8<br>NO RELIGION ..... 9<br>OTHER ..... 96<br>(SPECIFY)<br>REFUSED ..... 99                                                                                                                                                                                                                                                                                   |      |
| G_3_1 | How often do you attend religious services?              | NEVER ..... 9<br>MORE THAN ONCE PER WEEK ..... 1<br>ONCE PER WEEK ..... 2<br>NEARLY EVERY WEEK ..... 3<br>2-3 TIMES PER MONT ..... 4<br>ABOUT ONCE PER MONTH ..... 5<br>SEVERAL TIMES PER YEAR ..... 6<br>ONCE OR TWICE A YEAR ..... 7<br>LESS THAN ONCE A YEAR ..... 8<br>REFUSED ..... 99                                                                                                                                                                                                                                                                   |      |
| 306   | What is your tribe or ethnic group?                      | AKAN ..... 1<br>GA/DANGME ..... 2<br>EWE ..... 3<br>GUAN ..... 4<br>MOLE-DAGBANI ..... 5<br>GRUSI ..... 6<br>GURMA ..... 7<br>MANDE ..... 8<br>OTHER ..... 96<br>(SPECIFY)<br>REFUSED ..... 99                                                                                                                                                                                                                                                                                                                                                                |      |



| 4. REPRODUCTION |                                                                                                                                                                                                                                                                                                                                                                                                                                                                                                                                                                                                                                                                                                                                                                          |                                                                                                         |                  |
|-----------------|--------------------------------------------------------------------------------------------------------------------------------------------------------------------------------------------------------------------------------------------------------------------------------------------------------------------------------------------------------------------------------------------------------------------------------------------------------------------------------------------------------------------------------------------------------------------------------------------------------------------------------------------------------------------------------------------------------------------------------------------------------------------------|---------------------------------------------------------------------------------------------------------|------------------|
| NO.             | QUESTIONS AND FILTERS                                                                                                                                                                                                                                                                                                                                                                                                                                                                                                                                                                                                                                                                                                                                                    | CODING CATEGORIES                                                                                       | SKIP             |
| 401             | <p>Now I will read you a list of statements, and I would like you to tell me how many of the statements are true for you. You should not tell me which statements are true, only how many. By giving only the number of statements that are true for you, this will preserve your privacy as I will not know which statements are true for you. After I read the list, please tell me how many of these statements are true for you. First, we will complete an example:</p> <ol style="list-style-type: none"> <li>1. I have three children.</li> <li>2. I am 22 years old.</li> <li>3. I have received antenatal care during a pregnancy.</li> <li>4. I have had a tetanus toxoid vaccination.</li> </ol> <p><i>How many</i> of these statements are true for you?</p> | <p>NUMBER OF STATEMENTS <input type="text"/></p> <p>REFUSED 99</p>                                      |                  |
| 402             | <p>Do you have any questions about how to answer these questions?</p>                                                                                                                                                                                                                                                                                                                                                                                                                                                                                                                                                                                                                                                                                                    | <p>YES ..... 1</p> <p>NO ..... 2</p>                                                                    | ANSWER QUESTIONS |
| 403             | <p>Now we will complete the first real list of statements about your health. I will read you the list of statements, and I would like you to tell me how many of these statements are true for you.</p> <ol style="list-style-type: none"> <li>1. I have heard of an illness called tuberculosis (TB)</li> <li>2. I have been told I have hypertension or high blood pressure</li> <li>3. I have ever smoked cigarettes</li> <li>4. I had malaria as a child</li> <li>5. I have had an induced abortion (ended a pregnancy on purpose)</li> </ol> <p><i>How many</i> of these statements are true for you?</p>                                                                                                                                                           | <p>NUMBER OF STATEMENTS <input type="text"/></p> <p>REFUSED 99</p>                                      |                  |
| 404             | <p>Here is the next list of statements about your health. Please tell me how many of these statements are true for you.</p> <ol style="list-style-type: none"> <li>1. I have had a cold in the last year</li> <li>2. I have heard of an illness called diabetes (high blood sugar)</li> <li>3. I know someone who has told me they are HIV-positive</li> <li>4. I have been diagnosed with cancer</li> <li>5. I have had an induced abortion (ended a pregnancy on purpose)</li> </ol> <p><i>How many</i> of these statements are true for you?</p>                                                                                                                                                                                                                      | <p>NUMBER OF STATEMENTS <input type="text"/></p> <p>REFUSED 99</p>                                      |                  |
| G_4_1           | <p>Now I would like to ask some questions about marriage and sexual activity in order to gain a better understanding of some important life issues.</p> <p><b>CHECK 107:</b><br/>Just to make sure that I have this right: your current marital status is _____. Is that correct?<br/><i>If NOT correct, please change the roster information and return here.</i></p> <p>EVER MARRIED <input type="checkbox"/><br/>(Options 1,2 or 3)</p>                                                                                                                                                                                                                                                                                                                               | <p>NEVER MARRIED <input type="checkbox"/><br/>OR NEVER LIVED TOGETHER, OR REFUSED<br/>Option 4 or 9</p> | 406              |
| 405             | <p>How old were you when you first got married or started living with your partner as if married?</p>                                                                                                                                                                                                                                                                                                                                                                                                                                                                                                                                                                                                                                                                    | <p>AGE IN COMPLETED YEARS <input type="text"/></p> <p>DON'T KNOW ..... 88</p> <p>REFUSED ..... 99</p>   |                  |

| 4. REPRODUCTION |                                                                                                                                                                                                      |                                                                                                                                                                                                                                                                 |            |
|-----------------|------------------------------------------------------------------------------------------------------------------------------------------------------------------------------------------------------|-----------------------------------------------------------------------------------------------------------------------------------------------------------------------------------------------------------------------------------------------------------------|------------|
| NO.             | QUESTIONS AND FILTERS                                                                                                                                                                                | CODING CATEGORIES                                                                                                                                                                                                                                               | SKIP       |
| 406             | How old were you when you had sexual intercourse for the very first time?                                                                                                                            | NEVER HAD SEXUAL INTERCOU... 0<br>AGE IN YEARS ... <input type="text"/> <input type="text"/><br>REFUSED ... 99                                                                                                                                                  | 501<br>408 |
| 407             | When was the last time you had sexual intercourse? (RECORD IN UNIT RESPONDENT USES)<br><i>If less than 12 months ago, answer must be recorded in months, weeks, or days. Enter 0 days for today.</i> | <input type="text"/> <input type="text"/> Days ago<br><input type="text"/> <input type="text"/> Weeks ago<br><input type="text"/> <input type="text"/> Months ago<br><input type="text"/> <input type="text"/> Years ago<br>DON'T KNOW ... 88<br>REFUSED ... 99 |            |
| 408             | Now I would like to ask about all the live births you have had during your life. Have you ever given birth?                                                                                          | YES ... 1<br>NO ... 2<br>REFUSED ... 99                                                                                                                                                                                                                         | 420        |
| 409             | How old were you when you gave birth for the first time?                                                                                                                                             | AGE IN YEARS <input type="text"/> <input type="text"/><br>DON'T KNOW ... 88<br>REFUSED ... 99                                                                                                                                                                   |            |
| 410             | Do you have any sons or daughters to whom you have given birth who are now living with you?                                                                                                          | YES ... 1<br>NO ... 2<br>REFUSED ... 99                                                                                                                                                                                                                         | 412        |
| 411             | How many sons live with you?<br>And how many daughters live with you?<br>IF NONE, RECORD '00'.<br>IF REFUSED, RECORD '99'                                                                            | SONS AT HOME <input type="text"/> <input type="text"/><br>DAUGHTERS AT HOME <input type="text"/> <input type="text"/>                                                                                                                                           |            |
| 412             | Do you have any sons or daughters to whom you have given birth who are alive but do not live with you?                                                                                               | YES ... 1<br>NO ... 2<br>REFUSED ... 99                                                                                                                                                                                                                         | 414        |
| 413             | How many sons are alive but do not live with you?<br>And how many daughters are alive but do not live with you?<br>IF NONE, RECORD '00'.<br>IF REFUSED, RECORD '99'                                  | SONS ELSEWHERE <input type="text"/> <input type="text"/><br>DAUGHTERS ELSEWHERE <input type="text"/> <input type="text"/>                                                                                                                                       |            |
| 414             | Have you ever given birth to a boy or girl who was born alive but later died?<br>IF NO, PROBE: Any baby who cried or showed signs of life but did not survive?                                       | YES ... 1<br>NO ... 2<br>REFUSED ... 99                                                                                                                                                                                                                         | 416        |
| 415             | How many boys have died?<br>And how many girls have died?<br>IF NONE, RECORD '00'.<br>IF REFUSED, RECORD '99'                                                                                        | BOYS DEAD <input type="text"/> <input type="text"/><br>GIRLS DEAD <input type="text"/> <input type="text"/>                                                                                                                                                     |            |
| 416             | SUM ANSWERS TO 411, 413, AND 415, AND ENTER TOTAL.<br>IF NONE, RECORD '00'.<br>IF REFUSED, RECORD '99'                                                                                               | TOTAL BIRTHS <input type="text"/> <input type="text"/>                                                                                                                                                                                                          |            |

| 4. REPRODUCTION |                                                                                                                                                                                                                                                                                                                                                                                                                     |                                                                                                                                                                                                                                                                         |                                 |
|-----------------|---------------------------------------------------------------------------------------------------------------------------------------------------------------------------------------------------------------------------------------------------------------------------------------------------------------------------------------------------------------------------------------------------------------------|-------------------------------------------------------------------------------------------------------------------------------------------------------------------------------------------------------------------------------------------------------------------------|---------------------------------|
| NO.             | QUESTIONS AND FILTERS                                                                                                                                                                                                                                                                                                                                                                                               | CODING CATEGORIES                                                                                                                                                                                                                                                       | SKIP                            |
| 417             | CHECK 416:<br>Just to make sure that I have this right: you have had in TOTAL ____ births during your life. Is that correct?<br><br>YES <input type="checkbox"/> NO <input type="checkbox"/>                                                                                                                                                                                                                        |                                                                                                                                                                                                                                                                         | 411                             |
| 418             | CHECK 416:<br><br>ONE OR MORE BIRTHS <input type="checkbox"/> NO BIRTHS <input type="checkbox"/>                                                                                                                                                                                                                                                                                                                    |                                                                                                                                                                                                                                                                         | 420                             |
| 419             | <b>C</b> FOR EACH BIRTH SINCE JULY 2015 (Column 1), ENTER 'B' IN THE MONTH OF BIRTH IN THE CALENDAR. WRITE THE NAME OF THE CHILD TO THE LEFT OF THE 'B' CODE. FOR EACH BIRTH, ASK THE NUMBER OF MONTHS THE PREGNANCY LASTED AND RECORD 'P' IN EACH OF THE PRECEDING MONTHS ACCORDING TO THE DURATION OF PREGNANCY. (NOTE: THE NUMBER OF 'P's MUST BE ONE LESS THAN THE NUMBER OF MONTHS THAT THE PREGNANCY LASTED.) |                                                                                                                                                                                                                                                                         |                                 |
| 420             | Now I would like to ask you some questions about pregnancy. Are you pregnant now?                                                                                                                                                                                                                                                                                                                                   | YES ..... 1<br>NO ..... 2<br>DON'T KNOW / UNSURE ..... 88<br>REFUSE! ..... 99                                                                                                                                                                                           | if 418=1 to 424<br>if 418=0 425 |
| 421             | How many months pregnant are you?<br><br>RECORD NUMBER OF COMPLETED MONTHS.<br><br><b>C</b> ENTER 'P's IN THE CALENDAR, BEGINNING WITH THE MONTH OF INTERVIEW AND FOR THE TOTAL NUMBER OF COMPLETED MONTHS.                                                                                                                                                                                                         | MONTHS ..... <input type="text"/> <input type="text"/><br><br>DON'T KNOW ..... 88<br>REFUSE! ..... 99                                                                                                                                                                   |                                 |
| 422             | When you got pregnant, did you want to get pregnant at that time?                                                                                                                                                                                                                                                                                                                                                   | YES ..... 1<br>NO ..... 2<br>DON'T KNOW ..... 88<br>REFUSE! ..... 99                                                                                                                                                                                                    | 425                             |
| 423             | Did you want to have a baby later on or did you not want any more children?                                                                                                                                                                                                                                                                                                                                         | LATER ..... 1<br>NO MORE/NONE ..... 2<br>DON'T KNOW ..... 88<br>REFUSE! ..... 99                                                                                                                                                                                        | 425                             |
| 424             | Have you given birth within the last six months?                                                                                                                                                                                                                                                                                                                                                                    | YES ..... 1<br>NO ..... 2<br>REFUSE! ..... 99                                                                                                                                                                                                                           |                                 |
| 425             | Have you ever had a pregnancy that miscarried, was aborted, or ended in a stillbirth (no signs of life)?                                                                                                                                                                                                                                                                                                            | YES ..... 1<br>NO ..... 2<br>REFUSE! ..... 99                                                                                                                                                                                                                           | 501                             |
| 426             | When did the last such pregnancy end?<br><br>(RECORD IN UNIT RESPONDENT USES)                                                                                                                                                                                                                                                                                                                                       | <input type="text"/> <input type="text"/> Days ago<br><input type="text"/> <input type="text"/> Weeks ago<br><input type="text"/> <input type="text"/> Months ago<br><input type="text"/> <input type="text"/> Years ago<br><br>DON'T KNOW ..... 88<br>REFUSED ..... 99 |                                 |
| 427             | How many pregnancies were miscarried, ended by induced abortion, or ended in a stillbirth?                                                                                                                                                                                                                                                                                                                          | NUMBER OF PREGNANCY LOSSES <input type="text"/> <input type="text"/><br>REFUSE! ..... 99                                                                                                                                                                                |                                 |
| 428             | How many pregnancies ended in a stillbirth?                                                                                                                                                                                                                                                                                                                                                                         | NUMBER OF STILLBIRTHS <input type="text"/> <input type="text"/><br>NONE ..... 00<br>DON'T KNOW ..... 88<br>REFUSE! ..... 99                                                                                                                                             |                                 |
| 429             | How many pregnancies were miscarried?                                                                                                                                                                                                                                                                                                                                                                               | NUMBER OF MISCARRIAGES <input type="text"/> <input type="text"/><br>NONE ..... 00<br>DON'T KNOW ..... 88<br>REFUSE! ..... 99                                                                                                                                            |                                 |

| 4. REPRODUCTION |                                                                                                  |                                                                                                                                                                                                                                                                   |                   |
|-----------------|--------------------------------------------------------------------------------------------------|-------------------------------------------------------------------------------------------------------------------------------------------------------------------------------------------------------------------------------------------------------------------|-------------------|
| NO.             | QUESTIONS AND FILTERS                                                                            | CODING CATEGORIES                                                                                                                                                                                                                                                 | SKIP              |
| 430             | How many pregnancies were terminated by induced abortion (intentional termination of pregnancy)? | NUMBER OF ABORTIONS <input type="text"/> <input type="text"/><br>NONE ..... 00<br>DON'T KNOW ..... 88<br>REFUSE! ..... 99                                                                                                                                         | 444               |
| 431             | When was the last induced abortion?<br>(RECORD IN UNIT RESPONDENT USES)                          | <input type="text"/> <input type="text"/> Days ago<br><input type="text"/> <input type="text"/> Weeks ago<br><input type="text"/> <input type="text"/> Months ago<br><input type="text"/> <input type="text"/> Years ago<br>DON'T KI ..... 88<br>REFUSE! ..... 99 |                   |
| 435             | What was done to have the pregnancy terminated?                                                  | SURGICALLY (OPERATION) 1<br>INJECTION 2<br>TOOK PILLS/MEDICINES/MEDICATION ABORTION (M 3<br>INSERTED HERBS OR OBJECT IN WOMB, SPECIFY_ 4<br>TOOK HOMEMADE MEDICINE SPECIFY _____ 5<br>OTHER, SPECIFY 96<br>REFUSE! ..... 99                                       | 439<br>437<br>439 |
| 436             | What was the name of the surgical procedure used to end the pregnancy?                           | VACUUM ASPIRATION (MVA or EVA) 1<br>DILATION AND CURETTAGE (D&C)/<br>SHARP CURETTAGE 2<br>IUD INSERTION 3<br>OC PILLS/ TABLET 4<br>OTHER, SPECIFY 96<br>DON'T KNOW 88<br>REFUSE! ..... 99                                                                         | 439               |
| 437             | What kind of medication did you use to end the pregnancy?                                        | MIFEPRISTONE&MISOPROSTOL<br>(MEDABON/MARIPRIST) 1<br>MISOPROSTOL ALONE (MISOCLEAR/CYTOTEC) 2<br>ORAL CONTRACEPTIVE PILLS (Lydia, Microgynon) 3<br>OTHER PILLS 4<br>N_TABLETS 5<br>OTHER, SPECIFY 96<br>DON'T KNOW 88<br>REFUSE! ..... 99                          | 439               |
| 437B            | How did you take the pills?                                                                      | _____<br>_____<br>ENTER "DON'T KNOW or REFUSE" in TEXT IF NEEDED                                                                                                                                                                                                  |                   |
| 438             | In total, how many tablets or pills did you take to end the pregnancy?                           | NUMBER OF PILLS <input type="text"/> <input type="text"/><br>NOT APPLICABLE NA<br>DON'T KNOW 88<br>REFUSED 99                                                                                                                                                     |                   |

| 4. REPRODUCTION |                                                                                                                                |                                                                                                                                                                                                                                                                                                                                                                                                                                                                                                                                                                                                                                                                                                                                                                                                                                                                                                                                                 |                  |
|-----------------|--------------------------------------------------------------------------------------------------------------------------------|-------------------------------------------------------------------------------------------------------------------------------------------------------------------------------------------------------------------------------------------------------------------------------------------------------------------------------------------------------------------------------------------------------------------------------------------------------------------------------------------------------------------------------------------------------------------------------------------------------------------------------------------------------------------------------------------------------------------------------------------------------------------------------------------------------------------------------------------------------------------------------------------------------------------------------------------------|------------------|
| NO.             | QUESTIONS AND FILTERS                                                                                                          | CODING CATEGORIES                                                                                                                                                                                                                                                                                                                                                                                                                                                                                                                                                                                                                                                                                                                                                                                                                                                                                                                               | SKIP             |
| 432             | <p>From whom/where did you receive induced abortion services the last time?</p> <p>SELECT ALL THAT APPLY</p>                   | <p>PUBLIC SECTOR</p> <p>GOVT. HOSPITAL/POLYCLINIC ..... 11</p> <p>GOVT. HEALTH CENTER/CLINIC ..... 12</p> <p>GOVT. HEALTH POST/CHPS ..... 13</p> <p>FAMILY PLANNING CLINIC ..... 14</p> <p>MOBILE CLINIC ..... 15</p> <p>FIELDWORKER/OUTREACH/<br/>PEER EDUCATOR ..... 16</p> <p>OTHER PUBLIC ..... 17</p> <p>(SPECIFY) _____</p> <p>PRIVATE MEDICAL SECTOR</p> <p>PRIVATE HOSPITAL/CLINIC ..... 21</p> <p>PRIVATE DOCTOR ..... 22</p> <p>PHARMACY ..... 23</p> <p>CHEMICAL/DRUG STORE ..... 24</p> <p>FP/PPAG CLINIC ..... 25</p> <p>MATERNITY HOME ..... 26</p> <p>PROVIDER'S HOME ..... 37</p> <p>OTHER PRIVATE<br/>MEDICAL ..... 27</p> <p>(SPECIFY) _____</p> <p>OTHER SOURCE</p> <p>SHOP/MARKET ..... 31</p> <p>COMMUNITY VOLUNTEER ..... 33</p> <p>FRIEND/RELATIVE/PARTNER ..... 34</p> <p>NO SERVICES OBTAINED ..... 35</p> <p>ITINERANT DRUG PEDDLER ..... 36</p> <p>OTHER ..... 96</p> <p>(SPECIFY) _____</p> <p>REFUSED ..... 99</p> |                  |
| 433             | <p>Where did you learn about this place (primary source of information)?</p> <p>Select only one (Probe for primary source)</p> | <p>NEIGHBOR ..... 1</p> <p>FRIEND ..... 2</p> <p>MOTHER ..... 3</p> <p>MOTHER-IN-LAW ..... 4</p> <p>HUSBAND/PARTNER ..... 5</p> <p>OTHER RELATIVE ..... 6</p> <p>DOCTOR ..... 7</p> <p>NURSE/MIDWIFE WORKING AT HEALTH FACILITY ..... 8</p> <p>COMMUNITY HEALTH WORKER MAKING A HOME VI: ..... 9</p> <p>FIELD WORKER MAKING A HOME VISIT ..... 10</p> <p>PHARMACIST ..... 11</p> <p>NO ONE ..... 12</p> <p>OTHER ..... 96</p> <p>(SPECIFY) _____</p> <p>DON'T KNOW ..... 88</p> <p>REFUSE!... ..... 99</p>                                                                                                                                                                                                                                                                                                                                                                                                                                      |                  |
| 434             | <p>Who influenced you the most when deciding on this place? (Select one)</p>                                                   | <p>NEIGHBOR ..... 1</p> <p>FRIEND ..... 2</p> <p>MOTHER ..... 3</p> <p>MOTHER-IN-LAW ..... 4</p> <p>HUSBAND/PARTNER ..... 5</p> <p>OTHER RELATIVE ..... 6</p> <p>DOCTOR ..... 7</p> <p>NURSE/MIDWIFE WORKING AT HEALTH FACILITY ..... 8</p> <p>COMMUNITY HEALTH WORKER MAKING A HOME VI: ..... 9</p> <p>FIELD WORKER MAKING A HOME VISIT ..... 10</p> <p>PHARMACIST ..... 11</p> <p>NO ONE ..... 12</p> <p>OTHER ..... 96</p> <p>(SPECIFY) _____</p> <p>DON'T KNOW ..... 88</p> <p>REFUSE!... ..... 99</p>                                                                                                                                                                                                                                                                                                                                                                                                                                      |                  |
| 440             | <p>After termination, did you experience any health problems? (Select all that apply)</p>                                      | <p>HEAVY BLEEDING ..... 1</p> <p>VOMITING/NAUSEA ..... 2</p> <p>ABDOMINAL PAIN ..... 3</p> <p>FEVER ..... 4</p> <p>FOUL-SMELLING DISCHARGE/INFECTION ..... 5</p> <p>NO HEALTH PROBLEMS ..... 6</p> <p>OTHER, SPECIFY _____ 96</p> <p>REFUSED ..... 99</p>                                                                                                                                                                                                                                                                                                                                                                                                                                                                                                                                                                                                                                                                                       | <p>Section 5</p> |
| 439             | <p>Did you seek care or treatment for any of these problems?</p>                                                               | <p>YES ..... 1</p> <p>NO ..... 2</p> <p>REFUSED ..... 99</p>                                                                                                                                                                                                                                                                                                                                                                                                                                                                                                                                                                                                                                                                                                                                                                                                                                                                                    | <p>Section 5</p> |

| 4. REPRODUCTION                                                                                                           |                                                                                                                                                                                                                                                                                                                              |                                                                                                                                                                                                                                                                                                                                                                                                                                                                                                                                                                                                                                                                                                                                                                                                                   |      |
|---------------------------------------------------------------------------------------------------------------------------|------------------------------------------------------------------------------------------------------------------------------------------------------------------------------------------------------------------------------------------------------------------------------------------------------------------------------|-------------------------------------------------------------------------------------------------------------------------------------------------------------------------------------------------------------------------------------------------------------------------------------------------------------------------------------------------------------------------------------------------------------------------------------------------------------------------------------------------------------------------------------------------------------------------------------------------------------------------------------------------------------------------------------------------------------------------------------------------------------------------------------------------------------------|------|
| NO.                                                                                                                       | QUESTIONS AND FILTERS                                                                                                                                                                                                                                                                                                        | CODING CATEGORIES                                                                                                                                                                                                                                                                                                                                                                                                                                                                                                                                                                                                                                                                                                                                                                                                 | SKIP |
| 441                                                                                                                       | <p>Where did you receive treatment for these problems?</p> <p>SELECT ALL THAT APPLY</p>                                                                                                                                                                                                                                      | <p>PUBLIC SECTOR</p> <p>GOVT. HOSPITAL/POLYCLINIC ..... 11</p> <p>GOVT. HEALTH CENTER/CLINIC ..... 12</p> <p>GOVT. HEALTH POST/CHPS ..... 13</p> <p>FAMILY PLANNING CLINIC ..... 14</p> <p>MOBILE CLINIC ..... 15</p> <p>FIELDWORKER/OUTREACH/<br/>PEER EDUCATOR ..... 16</p> <p>OTHER PUBLIC ..... 17<br/>(SPECIFY) _____</p> <p>PRIVATE MEDICAL SECTOR</p> <p>PRIVATE HOSPITAL/CLINIC ..... 18</p> <p>PRIVATE DOCTOR ..... 19</p> <p>PHARMACY ..... 20</p> <p>CHEMICAL/DRUG STORE ..... 21</p> <p>FP/PPAG CLINIC ..... 22</p> <p>MATERNITY HOME ..... 23</p> <p>OTHER PRIVATE<br/>MEDICAL ..... 24<br/>(SPECIFY) _____</p> <p>OTHER SOURCE</p> <p>COMMUNITY VOLUNTEER ..... 25</p> <p>FRIEND/RELATIVE ..... 27</p> <p>OTHER ..... 96<br/>(SPECIFY) _____</p> <p>DON'T KNOW ..... 88</p> <p>REFUSED ..... 99</p> |      |
| 442                                                                                                                       | <p>Who influenced you the most when deciding on this place?</p>                                                                                                                                                                                                                                                              | <p>NEIGHBOR ..... 1</p> <p>FRIEND ..... 2</p> <p>MOTHER ..... 3</p> <p>MOTHER-IN-LAW ..... 4</p> <p>HUSBAND/PARTNER ..... 5</p> <p>OTHER RELATIVE ..... 6</p> <p>DOCTOR ..... 7</p> <p>NURSE/MIDWIFE WORKING AT HEALTH FACILITY ..... 8</p> <p>COMMUNITY HEALTH WORKER MAKING A HOME VISIT ..... 9</p> <p>FIELD WORKER MAKING A HOME VISIT ..... 10</p> <p>PHARMACIST ..... 11</p> <p>NO ONE ..... 12</p> <p>OTHER ..... 96<br/>(SPECIFY) _____</p> <p>DON'T KNOW ..... 88</p> <p>REFUSED ..... 99</p>                                                                                                                                                                                                                                                                                                            |      |
| 443                                                                                                                       | <p>Did you receive any family planning counseling during this visit?</p>                                                                                                                                                                                                                                                     | <p>YES ..... 1</p> <p>NO ..... 2</p> <p>DON'T KNOW ..... 88</p> <p>REFUSED ..... 99</p>                                                                                                                                                                                                                                                                                                                                                                                                                                                                                                                                                                                                                                                                                                                           |      |
| 444                                                                                                                       | <p><b>C</b> FOR EACH PREGNANCY THAT DID NOT END IN A LIVE BIRTH IN JULY 2015 (Col. 1) OR LATER, ENTER 'T' IN THE CALENDAR IN THE MONTH THAT THE PREGNANCY TERMINATED AND 'P' FOR THE REMAINING NUMBER OF COMPLETED MONTHS OF PREGNANCY.</p> <p>IF THERE ARE MORE THAN FOUR PREGNANCIES THAT DID NOT END IN A LIVE BIRTH,</p> |                                                                                                                                                                                                                                                                                                                                                                                                                                                                                                                                                                                                                                                                                                                                                                                                                   |      |
| <p>(1) Year of fieldwork is assumed to be 2018. For fieldwork beginning in 2019 or 2020, the year should be adjusted.</p> |                                                                                                                                                                                                                                                                                                                              |                                                                                                                                                                                                                                                                                                                                                                                                                                                                                                                                                                                                                                                                                                                                                                                                                   |      |

| 5. FAMILY PLANNING |                                                                                                                                                                               |                                               |      |
|--------------------|-------------------------------------------------------------------------------------------------------------------------------------------------------------------------------|-----------------------------------------------|------|
| NO.                | QUESTIONS AND FILTERS                                                                                                                                                         | CODING CATEGORIES                             | SKIP |
| 501                | Now I would like to talk about family planning - the various ways or methods that a man and woman can use to delay or avoid a pregnancy. Have you heard of:                   |                                               |      |
| 1                  | Female Sterilization. PROBE: Women can have an operation to avoid having any more children.                                                                                   | YES ..... 1<br>NO ..... 2<br>REFUSED ..... 99 |      |
| 2                  | Male Sterilization. PROBE: Men can have an operation to avoid having any more children.                                                                                       | YES ..... 1<br>NO ..... 2<br>REFUSED ..... 99 |      |
| 3                  | IUD. PROBE: Women can have a loop or coil placed inside them by a doctor or a nurse. (wearing loop or wearing rubber)                                                         | YES ..... 1<br>NO ..... 2<br>REFUSED ..... 99 |      |
| 4                  | Injectables. PROBE: Women can have an injection by a health provider that stops them from becoming pregnant for one or more months.                                           | YES ..... 1<br>NO ..... 2<br>REFUSED ..... 99 |      |
| 5                  | Implants. PROBE: Women can have one or more small rods placed in their upper arm by a doctor or nurse which can prevent pregnancy for one or more years.                      | YES ..... 1<br>NO ..... 2<br>REFUSED ..... 99 |      |
| 6                  | Pill. PROBE: Women can take a pill every day to avoid become pregnant.                                                                                                        | YES ..... 1<br>NO ..... 2<br>REFUSED ..... 99 |      |
| 7                  | Condom. PROBE: Men can put a rubber sheath on their penis before sexual intercourse to prevent pregnancy.                                                                     | YES ..... 1<br>NO ..... 2<br>REFUSED ..... 99 |      |
| 8                  | Female Condom. PROBE: Women can place a sheath in their vagina before sexual intercourse to prevent pregnancy.                                                                | YES ..... 1<br>NO ..... 2<br>REFUSED ..... 99 |      |
| 9                  | Spermicides/Foam tablets. PROBE: Women can place a suppository, jelly or cream in their vagina before sexual intercourse to prevent pregnancy.                                | YES ..... 1<br>NO ..... 2<br>REFUSED ..... 99 |      |
| 10                 | Lactational Amenorrhea Method (LAM). PROBE: Women can exclusively breastfeed their children until 6 months of age to avoid pregnancy.                                         | YES ..... 1<br>NO ..... 2<br>REFUSED ..... 99 |      |
| 11                 | Rhythm/Calendar Method. PROBE: To avoid pregnancy, women do not have sexual intercourse on the days of the month they think they can get pregnant.                            | YES ..... 1<br>NO ..... 2<br>REFUSED ..... 99 |      |
| 12                 | Withdrawal. PROBE: Men can be careful and pull out before climax.                                                                                                             | YES ..... 1<br>NO ..... 2<br>REFUSED ..... 99 |      |
| 13                 | Emergency Contraception. PROBE: As an emergency measure, within three days after they have unprotected sexual intercourse, women can take special pills to prevent pregnancy. | YES ..... 1<br>NO ..... 2<br>REFUSED ..... 99 |      |

**5. FAMILY PLANNING**

| NO. | QUESTIONS AND FILTERS                                                                                                                                     | CODING CATEGORIES                                                                                                                                                                                                                                                                                                                                                                                                                                                                                                  | SKIP                                   |
|-----|-----------------------------------------------------------------------------------------------------------------------------------------------------------|--------------------------------------------------------------------------------------------------------------------------------------------------------------------------------------------------------------------------------------------------------------------------------------------------------------------------------------------------------------------------------------------------------------------------------------------------------------------------------------------------------------------|----------------------------------------|
| 14  | Have you heard of any other ways or methods that women or men can use to avoid pregnancy?                                                                 | YES ..... 1<br>_____<br>(SPECIFY)<br>_____<br>(SPECIFY)<br>NO ..... 2<br>REFUSED ..... 99                                                                                                                                                                                                                                                                                                                                                                                                                          |                                        |
| 502 | IF "NO" TO ALL of 501 SKIP.<br><br>Where did you learn about any of these family planning methods?<br><br>SELECT ALL THAT APPLY                           | NEIGHBOR ..... 1<br>FRIEND ..... 2<br>RELATIVE ..... 3<br>HUSBAND ..... 4<br>DOCTOR ..... 5<br>NURSE/MIDWIFE WORKING AT HEALTH FACILITY ..... 6<br>NURSE/MIDWIFE MAKING A HOME VISIT ..... 7<br>FIELD WORKER MAKING A HOME VISIT ..... 8<br>PHARMACIST ..... 9<br>BOOK ..... 10<br>NEWSPAPER OR MAGAZINE ..... 11<br>TELEVISION ..... 12<br>INTERNET ..... 13<br>SOCIAL MEDIA ..... 14<br>NO ONE ..... 15<br>BILLBOARD ..... 16<br>OTHER ..... 96<br>_____<br>(SPECIFY)<br>DON'T KNOW ..... 88<br>REFUSED ..... 99 |                                        |
| 503 | According to Ghanaian law, under what condition(s) is it legal to have an induced abortion?<br>CIRCLE ALL THOSE MENTIONED SPONTANEOUSLY BY THE RESPONDENT | On request ..... 1<br>Economic or social reasons ..... 2<br>Foetal impairment ..... 3<br>Rape ..... 4<br>Incest ..... 5<br>Intellectual or cognitive disability of the woman ..... 6<br>Mental Health ..... 7<br>Physical Health ..... 8<br>Under no conditions/NOT LEGAL ..... 9<br>Other .....<br>_____<br>Don't know ..... 88<br>Refused ..... 99                                                                                                                                                               | SKIP TO 50<br>SKIP TO 50<br>SKIP TO 50 |
| 504 | According to Ghanaian law, up to how many weeks of pregnancy is it permitted to have an induced abortion?                                                 | WEEKS ..... <input type="text"/> <input type="text"/><br>DON'T KNOW ..... 88<br>REFUSED ..... 99                                                                                                                                                                                                                                                                                                                                                                                                                   |                                        |
| 505 | What methods for induced abortion have you ever heard of?<br><br>SELECT ALL THAT APPLY.                                                                   | SURGERY/OPERATION ..... 1<br>TABLETS/PILLS/MEDICATION ABORTION (MA) ..... 2<br>HOMEMADE CONCOCTION ..... 3<br>INSERTING HERBS OR OBJECT IN WOMB ..... 4<br>MASSAGE ..... 5<br>NONE ..... 6<br>INJECTION ..... 7<br>OTHER ..... 96<br>_____<br>(SPECIFY)<br>REFUSED ..... 99                                                                                                                                                                                                                                        |                                        |
| 506 | Have you ever sought information about having an induced abortion for an unwanted pregnancy?                                                              | YES ..... 1<br>NO ..... 2<br>DON'T KNOW ..... 88<br>REFUSED ..... 99                                                                                                                                                                                                                                                                                                                                                                                                                                               | } → 508                                |



| 5. FAMILY PLANNING        |                                                                                                                                                        |                                                                                                                                                                                                                                                                                                                                                                                                                                                                                                                                                                                                                                                                                                       |                                                                                                                                                                                                                                                                                      |  |        |  |                |                 |                |                 |                 |  |                 |  |                   |  |                   |  |                           |  |                           |  |                     |  |                     |  |                  |  |                  |  |  |
|---------------------------|--------------------------------------------------------------------------------------------------------------------------------------------------------|-------------------------------------------------------------------------------------------------------------------------------------------------------------------------------------------------------------------------------------------------------------------------------------------------------------------------------------------------------------------------------------------------------------------------------------------------------------------------------------------------------------------------------------------------------------------------------------------------------------------------------------------------------------------------------------------------------|--------------------------------------------------------------------------------------------------------------------------------------------------------------------------------------------------------------------------------------------------------------------------------------|--|--------|--|----------------|-----------------|----------------|-----------------|-----------------|--|-----------------|--|-------------------|--|-------------------|--|---------------------------|--|---------------------------|--|---------------------|--|---------------------|--|------------------|--|------------------|--|--|
| NO.                       | QUESTIONS AND FILTERS                                                                                                                                  | CODING CATEGORIES                                                                                                                                                                                                                                                                                                                                                                                                                                                                                                                                                                                                                                                                                     | SKIP                                                                                                                                                                                                                                                                                 |  |        |  |                |                 |                |                 |                 |  |                 |  |                   |  |                   |  |                           |  |                           |  |                     |  |                     |  |                  |  |                  |  |  |
| 507                       | Where did you get information about induced abortion?<br><br>SELECT ALL THAT APPLY                                                                     | NEIGHBOR ..... 1<br>FRIEND ..... 2<br>RELATIVE ..... 3<br>HUSBAND ..... 4<br>DOCTOR ..... 5<br>NURSE/MIDWIFE WORKING AT HEALTH FACILITY ..... 6<br>NURSE/MIDWIFE MAKING A HOME VISIT ..... 7<br>FIELD WORKER MAKING A HOME VISIT ..... 8<br>PHARMACIST ..... 9<br>BOOK ..... 10<br>NEWSPAPER OR MAGAZINE ..... 11<br>TELEVISION ..... 12<br>INTERNET ..... 13<br>SOCIAL MEDIA ..... 14<br>NO ONE ..... 15<br>OTHER _____ 96<br>(SPECIFY)<br>DON'T KNOW ..... 88<br>REFUSED ..... 99                                                                                                                                                                                                                   |                                                                                                                                                                                                                                                                                      |  |        |  |                |                 |                |                 |                 |  |                 |  |                   |  |                   |  |                           |  |                           |  |                     |  |                     |  |                  |  |                  |  |  |
| 508                       | In the past 2 years has any visitor come to talk with you about preventing pregnancy or terminating an unintended pregnancy?                           | YES ..... 1<br>NO ..... 2<br>DON'T KNOW ..... 88<br>REFUSED ..... 99                                                                                                                                                                                                                                                                                                                                                                                                                                                                                                                                                                                                                                  | 524                                                                                                                                                                                                                                                                                  |  |        |  |                |                 |                |                 |                 |  |                 |  |                   |  |                   |  |                           |  |                           |  |                     |  |                     |  |                  |  |                  |  |  |
| 509                       | What organization(s) was/were the visitor(s) from?<br><br>SELECT ALL THAT APPLY                                                                        | WILLOWS ..... 1<br>GOVERNMENT ..... 2<br>OTHER, SPECIFY ..... 96<br>DON'T KNOW ..... 88<br>REFUSED ..... 99                                                                                                                                                                                                                                                                                                                                                                                                                                                                                                                                                                                           |                                                                                                                                                                                                                                                                                      |  |        |  |                |                 |                |                 |                 |  |                 |  |                   |  |                   |  |                           |  |                           |  |                     |  |                     |  |                  |  |                  |  |  |
| 510                       | CHECK 509: WILLOWS IF 1 & OTHERS IF 2 OR 96<br><br>In the last 2 years, how many times did someone come to visit to provide counseling or information? | <table border="0"> <thead> <tr> <th colspan="2">WILLOWS</th> <th colspan="2">OTHERS</th> </tr> </thead> <tbody> <tr> <td>1 TIME ..... 1</td> <td>(SKIP TO 512) ←</td> <td>1 TIME ..... 1</td> <td>(SKIP TO 512) ←</td> </tr> <tr> <td>2 TIMES ..... 2</td> <td></td> <td>2 TIMES ..... 2</td> <td></td> </tr> <tr> <td>3-5 TIMES ..... 3</td> <td></td> <td>3-5 TIMES ..... 3</td> <td></td> </tr> <tr> <td>MORE THAN 5 TIMES ..... 4</td> <td></td> <td>MORE THAN 5 TIMES ..... 4</td> <td></td> </tr> <tr> <td>DON'T KNOW ..... 88</td> <td></td> <td>DON'T KNOW ..... 88</td> <td></td> </tr> <tr> <td>REFUSED ..... 99</td> <td></td> <td>REFUSED ..... 99</td> <td></td> </tr> </tbody> </table> | WILLOWS                                                                                                                                                                                                                                                                              |  | OTHERS |  | 1 TIME ..... 1 | (SKIP TO 512) ← | 1 TIME ..... 1 | (SKIP TO 512) ← | 2 TIMES ..... 2 |  | 2 TIMES ..... 2 |  | 3-5 TIMES ..... 3 |  | 3-5 TIMES ..... 3 |  | MORE THAN 5 TIMES ..... 4 |  | MORE THAN 5 TIMES ..... 4 |  | DON'T KNOW ..... 88 |  | DON'T KNOW ..... 88 |  | REFUSED ..... 99 |  | REFUSED ..... 99 |  |  |
| WILLOWS                   |                                                                                                                                                        | OTHERS                                                                                                                                                                                                                                                                                                                                                                                                                                                                                                                                                                                                                                                                                                |                                                                                                                                                                                                                                                                                      |  |        |  |                |                 |                |                 |                 |  |                 |  |                   |  |                   |  |                           |  |                           |  |                     |  |                     |  |                  |  |                  |  |  |
| 1 TIME ..... 1            | (SKIP TO 512) ←                                                                                                                                        | 1 TIME ..... 1                                                                                                                                                                                                                                                                                                                                                                                                                                                                                                                                                                                                                                                                                        | (SKIP TO 512) ←                                                                                                                                                                                                                                                                      |  |        |  |                |                 |                |                 |                 |  |                 |  |                   |  |                   |  |                           |  |                           |  |                     |  |                     |  |                  |  |                  |  |  |
| 2 TIMES ..... 2           |                                                                                                                                                        | 2 TIMES ..... 2                                                                                                                                                                                                                                                                                                                                                                                                                                                                                                                                                                                                                                                                                       |                                                                                                                                                                                                                                                                                      |  |        |  |                |                 |                |                 |                 |  |                 |  |                   |  |                   |  |                           |  |                           |  |                     |  |                     |  |                  |  |                  |  |  |
| 3-5 TIMES ..... 3         |                                                                                                                                                        | 3-5 TIMES ..... 3                                                                                                                                                                                                                                                                                                                                                                                                                                                                                                                                                                                                                                                                                     |                                                                                                                                                                                                                                                                                      |  |        |  |                |                 |                |                 |                 |  |                 |  |                   |  |                   |  |                           |  |                           |  |                     |  |                     |  |                  |  |                  |  |  |
| MORE THAN 5 TIMES ..... 4 |                                                                                                                                                        | MORE THAN 5 TIMES ..... 4                                                                                                                                                                                                                                                                                                                                                                                                                                                                                                                                                                                                                                                                             |                                                                                                                                                                                                                                                                                      |  |        |  |                |                 |                |                 |                 |  |                 |  |                   |  |                   |  |                           |  |                           |  |                     |  |                     |  |                  |  |                  |  |  |
| DON'T KNOW ..... 88       |                                                                                                                                                        | DON'T KNOW ..... 88                                                                                                                                                                                                                                                                                                                                                                                                                                                                                                                                                                                                                                                                                   |                                                                                                                                                                                                                                                                                      |  |        |  |                |                 |                |                 |                 |  |                 |  |                   |  |                   |  |                           |  |                           |  |                     |  |                     |  |                  |  |                  |  |  |
| REFUSED ..... 99          |                                                                                                                                                        | REFUSED ..... 99                                                                                                                                                                                                                                                                                                                                                                                                                                                                                                                                                                                                                                                                                      |                                                                                                                                                                                                                                                                                      |  |        |  |                |                 |                |                 |                 |  |                 |  |                   |  |                   |  |                           |  |                           |  |                     |  |                     |  |                  |  |                  |  |  |
| 511                       | Did the same person come to visit you more than once?                                                                                                  | YES ..... 1<br>NO ..... 2<br>DON'T KNOW ..... 88<br>REFUSED ..... 99                                                                                                                                                                                                                                                                                                                                                                                                                                                                                                                                                                                                                                  | YES ..... 1<br>NO ..... 2<br>DON'T KNOW ..... 88<br>REFUSED ..... 99                                                                                                                                                                                                                 |  |        |  |                |                 |                |                 |                 |  |                 |  |                   |  |                   |  |                           |  |                           |  |                     |  |                     |  |                  |  |                  |  |  |
| 512                       | What gender was the person(s) who came to visit?                                                                                                       | MALE ..... 1<br>FEMALE ..... 2<br>BOTH MALE AND FEMALE VISITORS ..... 88<br>REFUSED ..... 99                                                                                                                                                                                                                                                                                                                                                                                                                                                                                                                                                                                                          | MALE ..... 1<br>FEMALE ..... 2<br>BOTH MALE AND FEMALE VISITORS ..... 88<br>REFUSED ..... 99                                                                                                                                                                                         |  |        |  |                |                 |                |                 |                 |  |                 |  |                   |  |                   |  |                           |  |                           |  |                     |  |                     |  |                  |  |                  |  |  |
| 513                       | What topics did the person(s) talk with you about during the home visit?<br><br>SELECT ALL THAT APPLY                                                  | PREGNANCY ..... 1<br>FAMILY PLANNING ..... 2<br>ABORTION ..... 3<br>SEXUALLY TRANSMITTED INFECTIONS (STIs) ..... 4<br>PAP SMEAR (CERVICAL CANCER SCREENING) ..... 5<br>BREAST EXAM ..... 6<br>INFERTILITY ..... 7<br>OTHER _____ 96<br>(SPECIFY)<br>DON'T KNOW ..... 88<br>REFUSED ..... 99                                                                                                                                                                                                                                                                                                                                                                                                           | PREGNANCY ..... 1<br>FAMILY PLANNING ..... 2<br>ABORTION ..... 3<br>SEXUALLY TRANSMITTED INFECTIONS ..... 4<br>PAP SMEAR (CERVICAL CANCER SCREENING) ..... 5<br>BREAST EXAM ..... 6<br>INFERTILITY ..... 7<br>OTHER _____ 96<br>(SPECIFY)<br>DON'T KNOW ..... 88<br>REFUSED ..... 99 |  |        |  |                |                 |                |                 |                 |  |                 |  |                   |  |                   |  |                           |  |                           |  |                     |  |                     |  |                  |  |                  |  |  |
| 514                       | Were you counseled or provided information on using family planning methods?                                                                           | YES ..... 1<br>NO ..... 2<br>DON'T KNOW ..... 88<br>REFUSED ..... 99<br>(SKIP TO 516) ←                                                                                                                                                                                                                                                                                                                                                                                                                                                                                                                                                                                                               | YES ..... 1<br>NO ..... 2<br>DON'T KNOW ..... 88<br>REFUSED ..... 99<br>(SKIP TO 516) ←                                                                                                                                                                                              |  |        |  |                |                 |                |                 |                 |  |                 |  |                   |  |                   |  |                           |  |                           |  |                     |  |                     |  |                  |  |                  |  |  |

**5. FAMILY PLANNING**

| NO. | QUESTIONS AND FILTERS                                                                              | CODING CATEGORIES                                                                                                                                                                                                                                                                                                                                                                                                                                                                                                                                                                                |                                                                                                                                                                                                                                                                                                                                                                                                                                                                                                                                                                    | SKIP |
|-----|----------------------------------------------------------------------------------------------------|--------------------------------------------------------------------------------------------------------------------------------------------------------------------------------------------------------------------------------------------------------------------------------------------------------------------------------------------------------------------------------------------------------------------------------------------------------------------------------------------------------------------------------------------------------------------------------------------------|--------------------------------------------------------------------------------------------------------------------------------------------------------------------------------------------------------------------------------------------------------------------------------------------------------------------------------------------------------------------------------------------------------------------------------------------------------------------------------------------------------------------------------------------------------------------|------|
| 515 | Which method(s) were you counseled/given information on?<br><br>CIRCLE ALL MENTIONED.              | FEMALE STERILIZATION . . . . . 1<br>MALE STERILIZATION . . . . . 2<br>IUD . . . . . 3<br>INJECTABLES . . . . . 4<br>IMPLANTS . . . . . 5<br>PILL . . . . . 6<br>CONDOM . . . . . 7<br>FEMALE CONDOM . . . . . 8<br>DIAPHRAGM . . . . . 9<br>FOAM/JELLY . . . . . 10<br>EMERGENCY CONTRACEPTION . . . . . 11<br>STANDARD DAYS/ CALENDAR METHOD . . . . . 12<br>LACTATIONAL AMEN. METH . . . . . 13<br>RHYTHM METHOD . . . . . 14<br>WITHDRAWAL . . . . . 15<br>N TABLET . . . . . 16<br>OTHER _____ . . . . . 17<br>NONE . . . . . 18<br>DON'T KNOW/REMEMBER . . . . . 88<br>REFUSED . . . . . 99 | FEMALE STERILIZA . . . . . 1<br>MALE STERILIZATI . . . . . 2<br>IUD . . . . . 3<br>INJECTABLES . . . . . 4<br>IMPLANTS . . . . . 5<br>PILL . . . . . 6<br>CONDOM . . . . . 7<br>FEMALE CONDOM . . . . . 8<br>DIAPHRAGM . . . . . 9<br>FOAM/JELLY . . . . . 10<br>EMERGENCY CON . . . . . 11<br>STANDARD DAYS/ CALENDAR . . . . . 12<br>LACTATIONAL AME . . . . . 13<br>RHYTHM METHOD . . . . . 14<br>WITHDRAWAL . . . . . 15<br>N TABLET . . . . . 16<br>OTHER _____ . . . . . 17<br>NONE . . . . . 18<br>DON'T KNOW/REMEMBER . . . . . 88<br>REFUSED . . . . . 99 |      |
| 516 | Who else (besides yourself) participated in the information sessions?<br><br>CIRCLE ALL MENTIONED. | HUSBAND/PARTNER . . . . . 1<br>MOTHER . . . . . 2<br>DAUGHTER . . . . . 3<br>SON . . . . . 4<br>FRIEND/NEIGHBOR . . . . . 5<br>OTHERS . . . . . 6<br>NO ONE ELSE . . . . . 7<br>REFUSED . . . . . 99                                                                                                                                                                                                                                                                                                                                                                                             | HUSBAND/PART . . . . . 1<br>MOTHEF . . . . . 2<br>DAUGHT . . . . . 3<br>SON . . . . . 4<br>FRIEND/NEIGH . . . . . 5<br>OTHERS . . . . . 6<br>NO ONE ELSE . . . . . 7<br>REFUSED . . . . . 99                                                                                                                                                                                                                                                                                                                                                                       |      |
| 517 | Did she/he ever show you examples of contraceptive methods?                                        | YES . . . . . 1<br>NO . . . . . 2<br>DON'T KNOW . . . . . 88<br>REFUSED . . . . . 99                                                                                                                                                                                                                                                                                                                                                                                                                                                                                                             | YES . . . . . 1<br>NO . . . . . 2<br>DON'T KNOW . . . . . 88<br>REFUSED . . . . . 99                                                                                                                                                                                                                                                                                                                                                                                                                                                                               |      |
| 518 | Did she/he ever give you brochures or materials about contraceptive methods?                       | YES . . . . . 1<br>NO . . . . . 2<br>DON'T KNOW . . . . . 88<br>REFUSED . . . . . 99                                                                                                                                                                                                                                                                                                                                                                                                                                                                                                             | YES . . . . . 1<br>NO . . . . . 2<br>DON'T KNOW . . . . . 88<br>REFUSED . . . . . 99                                                                                                                                                                                                                                                                                                                                                                                                                                                                               |      |
| 519 | Did she/he ever discuss induced abortion with you?                                                 | YES . . . . . 1<br>NO . . . . . 2<br>DON'T KNOW/ . . . . . 88<br>REFUSED . . . . . 99<br>(SKIP TO 521) ←                                                                                                                                                                                                                                                                                                                                                                                                                                                                                         | YES . . . . . 1<br>NO . . . . . 2<br>DON'T . . . . . 88<br>REFUSED . . . . . 99<br>(SKIP TO 521) ←                                                                                                                                                                                                                                                                                                                                                                                                                                                                 |      |
| 520 | Did she/he ever provide brochures or materials about induced abortion to you?                      | YES . . . . . 1<br>NO . . . . . 2<br>DON'T KNOW . . . . . 88<br>REFUSED . . . . . 99                                                                                                                                                                                                                                                                                                                                                                                                                                                                                                             | YES . . . . . 1<br>NO . . . . . 2<br>DON'T KNOW . . . . . 88<br>REFUSED . . . . . 99                                                                                                                                                                                                                                                                                                                                                                                                                                                                               |      |
| 521 | Did she/he ever refer you to a health facility for family planning or reproductive health issues?  | YES . . . . . 1<br>NO . . . . . 2<br>DON'T KNOW . . . . . 88<br>REFUSED . . . . . 99<br>(SKIP TO 523) ←                                                                                                                                                                                                                                                                                                                                                                                                                                                                                          | YES . . . . . 1<br>NO . . . . . 2<br>DON'T KNOW . . . . . 88<br>REFUSED . . . . . 99<br>(SKIP TO 523) ←                                                                                                                                                                                                                                                                                                                                                                                                                                                            |      |
| 522 | Did you go there based on this referral?                                                           | YES . . . . . 1<br>NO . . . . . 2<br>DON'T KNOW . . . . . 88<br>REFUSED . . . . . 99                                                                                                                                                                                                                                                                                                                                                                                                                                                                                                             | YES . . . . . 1<br>NO . . . . . 2<br>DON'T KNOW . . . . . 88<br>REFUSED . . . . . 99                                                                                                                                                                                                                                                                                                                                                                                                                                                                               |      |
| 523 | Do you think the information provided by the field worker(s) was reliable?                         | YES . . . . . 1<br>SOMEWHAT . . . . . 2<br>NO . . . . . 3<br>DON'T KNOW . . . . . 88<br>REFUSED . . . . . 99                                                                                                                                                                                                                                                                                                                                                                                                                                                                                     | YES . . . . . 1<br>SOMEWHAT . . . . . 2<br>NO . . . . . 3<br>DON'T KNOW . . . . . 88<br>REFUSED . . . . . 99                                                                                                                                                                                                                                                                                                                                                                                                                                                       |      |

| 5. FAMILY PLANNING |                                                                                                                                      |                                                                                                                                                                                                                                                                                                                                                                                                                                                                                                                                                                                                                                                                                 |       |
|--------------------|--------------------------------------------------------------------------------------------------------------------------------------|---------------------------------------------------------------------------------------------------------------------------------------------------------------------------------------------------------------------------------------------------------------------------------------------------------------------------------------------------------------------------------------------------------------------------------------------------------------------------------------------------------------------------------------------------------------------------------------------------------------------------------------------------------------------------------|-------|
| NO.                | QUESTIONS AND FILTERS                                                                                                                | CODING CATEGORIES                                                                                                                                                                                                                                                                                                                                                                                                                                                                                                                                                                                                                                                               | SKIP  |
| 524                | In the past 2 years, have you visited a health facility for care for yourself (or your children)?                                    | YES ..... 1<br>NO ..... 2<br>REFUSED ..... 99                                                                                                                                                                                                                                                                                                                                                                                                                                                                                                                                                                                                                                   | → 526 |
| 525                | Why have you not visited a health facility in the past 2 years? (Select all that apply)                                              | TOO FAR ..... 1<br>TOO EXPENSIVE ..... 2<br>NO NEED ..... 3<br>OTHER, SPECIFY ..... 96<br>REFUSED ..... 99                                                                                                                                                                                                                                                                                                                                                                                                                                                                                                                                                                      | → 539 |
| 526                | During any visit in the past 2 years, did any staff member at the health facility speak to you about family planning methods?        | YES ..... 1<br>NO ..... 2<br>REFUSED ..... 99                                                                                                                                                                                                                                                                                                                                                                                                                                                                                                                                                                                                                                   | → 539 |
| 527                | Which health facility did you receive family planning information from the last time?<br><br>PROBE TO IDENTIFY THE TYPE OF FACILITY. | <b>PUBLIC SECTOR</b><br>GOVT. HOSPITAL/POLYCL ..... 11<br>GOVT. HEALTH CENTER/CLINIC ..... 12<br>GOVT. HEALTH POST/CHPS ..... 13<br>FAMILY PLANNING CLINIC ..... 14<br>MOBILE CLINIC ..... 15<br>FIELDWORKER/OUTRE .....<br>ACH/PEER<br>EDUCATOR/<br>COMMUNITY HEALTH<br>WORKER ..... 16<br>OTHER PUBLIC<br>SECTOR ..... 17<br>(SPECIFY)<br><b>PRIVATE MEDICAL SECTOR</b><br>PRIVATE HOSPITAL/CLINIC ..... 18<br>PRIVATE DOCTOR ..... 19<br>PHARMACY ..... 20<br>CHEMICAL/DRUG STORE ..... 21<br>FP/PPAG CLINIC ..... 22<br>MATERNITY HOME ..... 23<br>OTHER PRIVATE MEDICAL<br>..... 24<br>(SPECIFY)<br>OTHER ..... 96<br>(SPECIFY)<br>DON'T KNOW ..... 88<br>REFUSED ..... 99 |       |
| 527B               | What was this health facility called? (Name)                                                                                         | _____                                                                                                                                                                                                                                                                                                                                                                                                                                                                                                                                                                                                                                                                           |       |
| 528                | Who provided you with this information or counseling (during the last visit)?<br><br>SELECT ALL THAT APPLY                           | DOCTOR ..... 1<br>NURSE ..... 2<br>MIDWIFE ..... 3<br>FIELDWORKER/OUTRE ..... 4<br>PEER EDUCATOR ..... 5<br>PHARMACIST<br>OTHER ..... 96<br>(SPECIFY)<br>DON'T KNOW ..... 88<br>REFUSED ..... 99                                                                                                                                                                                                                                                                                                                                                                                                                                                                                |       |

| 5. FAMILY PLANNING |                                                                                                       |                                                                                                                                                                                                                                                                                                                                                                                                                                                                                                              |      |
|--------------------|-------------------------------------------------------------------------------------------------------|--------------------------------------------------------------------------------------------------------------------------------------------------------------------------------------------------------------------------------------------------------------------------------------------------------------------------------------------------------------------------------------------------------------------------------------------------------------------------------------------------------------|------|
| NO.                | QUESTIONS AND FILTERS                                                                                 | CODING CATEGORIES                                                                                                                                                                                                                                                                                                                                                                                                                                                                                            | SKIP |
| 529                | Which method(s) were you counseled on the last time?<br><br>CIRCLE ALL MENTIONED.                     | FEMALE STERILIZATION ..... 1<br>MALE STERILIZATION ..... 2<br>IUD ..... 3<br>INJECTABLES ..... 4<br>IMPLANTS ..... 5<br>PILL ..... 6<br>CONDOM ..... 7<br>FEMALE CONDOM ..... 8<br>DIAPHRAGM ..... 9<br>FOAM/JELLY ..... 10<br>EMERGENCY CONTRACEPTION ..... 11<br>STANDARD DAYS/ CALENDAR METHOI ..... 12<br>LACTATIONAL AMEN. METHOD ..... 13<br>RHYTHM METHOD ..... 14<br>WITHDRAWAL ..... 15<br>N TABLET ..... 16<br>OTHER ..... 17<br>NONE ..... 18<br>DON'T KNOW/REMEMBER ..... 88<br>REFUSED ..... 99 |      |
| 530                | <b>CHECK Q. 107:</b><br><br><input type="checkbox"/> CURRENTLY MARRIED/LIVING WITH PARTNER (Option 1) | NOT CURRENTLY MARRIED <input type="checkbox"/> OR LIVING TOGETHER WITH PARTNER (Options 2,3,4)                                                                                                                                                                                                                                                                                                                                                                                                               | 532  |
| 531                | Did your husband/partner participate in the counseling/information session the last time?             | YES ..... 1<br>NO ..... 2<br>REFUSED ..... 99                                                                                                                                                                                                                                                                                                                                                                                                                                                                |      |
| 532                | In which language(s) were you counseled the last time?<br><br>SELECT ALL THAT APPLY.                  | AKAN ..... 1<br>GA ..... 2<br>EWE ..... 3<br>NZEMA ..... 4<br>DAGBANI ..... 5<br>ENGLISH ..... 6<br>OTHER (specify) ..... 96<br>DON'T REMEMBER/DON'T KNOW ..... 88<br>REFUSED ..... 99                                                                                                                                                                                                                                                                                                                       |      |
| 533                | Did the person who counseled you ask questions about your health?                                     | YES ..... 1<br>NO ..... 2<br>DON'T KNOW ..... 88<br>REFUSED ..... 99                                                                                                                                                                                                                                                                                                                                                                                                                                         |      |
| 534                | Were you counseled on what would happen if you chose NOT to use family planning?                      | YES ..... 1<br>NO ..... 2<br>DON'T KNOW ..... 88<br>REFUSED ..... 99                                                                                                                                                                                                                                                                                                                                                                                                                                         |      |
| 535                | Do you feel that you were given enough information about family planning?                             | YES ..... 1<br>NO ..... 2<br>DON'T KNOW ..... 88<br>REFUSED ..... 99                                                                                                                                                                                                                                                                                                                                                                                                                                         |      |
| 536                | Are you satisfied with the FAMILY PLANNING COUNSELING service you received at your last visit?        | FULLY SATISFIED ..... 1<br>SOMEWHAT SATISFIED ..... 2<br>NOT SATISFIED ..... 3<br>DON'T KNOW ..... 88<br>REFUSED ..... 99                                                                                                                                                                                                                                                                                                                                                                                    |      |
| 537                | Do you think the family planning information provided by this service provider is reliable?           | YES ..... 1<br>SOMEWHAT ..... 2<br>NO ..... 3<br>DON'T KNOW ..... 88<br>REFUSED ..... 99                                                                                                                                                                                                                                                                                                                                                                                                                     |      |

**5. FAMILY PLANNING**

| NO. | QUESTIONS AND FILTERS                                                                                                                                       | CODING CATEGORIES                                                                                                                                                                                                                                                                                                                                                                                                                                                                                                                                                                                                              | SKIP                           |
|-----|-------------------------------------------------------------------------------------------------------------------------------------------------------------|--------------------------------------------------------------------------------------------------------------------------------------------------------------------------------------------------------------------------------------------------------------------------------------------------------------------------------------------------------------------------------------------------------------------------------------------------------------------------------------------------------------------------------------------------------------------------------------------------------------------------------|--------------------------------|
| 538 | Would you recommend services from this provider to a friend or a relative in a similar situation as you?                                                    | YES ..... 1<br>NO ..... 2<br>DON'T KNOW ..... 88<br>REFUSED ..... 99                                                                                                                                                                                                                                                                                                                                                                                                                                                                                                                                                           |                                |
| 539 | Have you <u>ever</u> used anything or tried in any way to delay or avoid getting pregnant?                                                                  | YES ..... 1<br>NO ..... 2<br>REFUSED ..... 99                                                                                                                                                                                                                                                                                                                                                                                                                                                                                                                                                                                  | <input type="checkbox"/> → 541 |
| 540 | Which method(s) have you ever used?<br><br>CIRCLE ALL MENTIONED.                                                                                            | FEMALE STERILIZATION ..... 1<br>MALE STERILIZATION ..... 2<br>IUD (Copper T, loop, wearing loop) ..... 3<br>INJECTABLES (Depo-provera, h ..... 4<br>IMPLANTS (Jadelle, Impla ..... 5<br>PILL (Secure, Lydia, Microgynon, Microlut) ..... 6<br>CONDOM ..... 7<br>FEMALE CONDOM ..... 8<br>DIAPHRAGM ..... 9<br>FOAM/JELLY ..... 10<br>EMERGENCY CONTRACEPTION (Postinor2, ..... 11<br>STANDARD DAYS/ CALENDAR METHOI ..... 12<br>LACTATIONAL AMEN. METHOD ..... 13<br>RHYTHM METHOD ..... 14<br>WITHDRAWAL ..... 15<br>N TABLET ..... 16<br>OTHER ..... 17<br>NONE ..... 18<br>DON'T KNOW/REMEMBER ..... 88<br>REFUSED ..... 99 |                                |
| 541 | In choosing a contraceptive method, what feature would be <b>most</b> important to you?<br><br>SELECT ONE-Probe for most important reason to the respondent | HOW EFFECTIVE IT IS AT PREVENTING PREGNANCY ..... 1<br>CAN BE USED WITHOUT ANYONE ELSE KNOWING ..... 2<br>THAT IT PROTECTS AGAINST STIs/HIV ..... 3<br>NO RISK OF HARMING HEALTH ..... 4<br>NO EFFECT ON REGULAR MONTHLY BLEEDING ..... 5<br>NO UNPLEASANT SIDE EFFECTS ..... 6<br>EASY TO USE ..... 7<br>EASY TO OBTAIN ..... 8<br>AFFORDABILITY ..... 9<br>CAN BE USED FOR A LONG TIME WITHOUT NEED TO VISIT CLINIC OR RE-SUPPLY ..... 10<br>WILL BE ABLE TO GET PREGNANT WHEN I WANT ..... 11<br>OTHER ..... 96<br>(SPECIFY) _____<br>DON'T KNOW ..... 88<br>REFUSED ..... 99                                               |                                |
| 542 | CHECK Q. 539:<br><br>EVER USED <input type="checkbox"/><br>FAMILY PLANNING                                                                                  | NEVER USED <input type="checkbox"/><br>FAMILY PLANNING                                                                                                                                                                                                                                                                                                                                                                                                                                                                                                                                                                         | → 548                          |
| 543 | CHECK Q. 420:<br><br>NOT PREGNANT OR UNSURE <input type="checkbox"/>                                                                                        | PREGNANT <input type="checkbox"/>                                                                                                                                                                                                                                                                                                                                                                                                                                                                                                                                                                                              | → 555                          |
| 544 | Are you or your husband/partner currently doing something or using any method to delay or avoid getting pregnant?                                           | YES ..... 1<br>NO ..... 2<br>DON'T KNOW ..... 88<br>REFUSED ..... 99                                                                                                                                                                                                                                                                                                                                                                                                                                                                                                                                                           | <input type="checkbox"/> → 547 |



| 5. FAMILY PLANNING |                                                                                                                                                                                                                                       |                                                                                                                                                                                                                                                                                                                                                                                                                                                                                                                                                                                                                                                                                                                                       |      |
|--------------------|---------------------------------------------------------------------------------------------------------------------------------------------------------------------------------------------------------------------------------------|---------------------------------------------------------------------------------------------------------------------------------------------------------------------------------------------------------------------------------------------------------------------------------------------------------------------------------------------------------------------------------------------------------------------------------------------------------------------------------------------------------------------------------------------------------------------------------------------------------------------------------------------------------------------------------------------------------------------------------------|------|
| NO.                | QUESTIONS AND FILTERS                                                                                                                                                                                                                 | CODING CATEGORIES                                                                                                                                                                                                                                                                                                                                                                                                                                                                                                                                                                                                                                                                                                                     | SKIP |
| 553                | CHECK Q. 539:<br><br>EVER USED <input type="checkbox"/><br>FAMILY PLANNING                                                                                                                                                            | NEVER USED <input type="checkbox"/><br>FAMILY PLANNING                                                                                                                                                                                                                                                                                                                                                                                                                                                                                                                                                                                                                                                                                | 579  |
| 554                | CHECK Q. 544:<br><br>NOT CURRENTLY USING <input type="checkbox"/><br>FAMILY PLANNING                                                                                                                                                  | CURRENTLY USING <input type="checkbox"/><br>FAMILY PLANNING                                                                                                                                                                                                                                                                                                                                                                                                                                                                                                                                                                                                                                                                           | 556  |
| 555                | You mentioned that you are not currently using a family planning method. Which method(s) did you use last?<br><br>RECORD ALL MENTIONED.<br><br>IF MORE THAN ONE METHOD MENTIONED, FOLLOW SKIP INSTRUCTION FOR HIGHEST METHOD IN LIST. | FEMALE STERILIZATION ..... 1<br>MALE STERILIZATION ..... 2<br>IUD ..... 3<br>INJECTABLES ..... 4<br>IMPLANTS ..... 5<br>PILL ..... 6<br>CONDOM ..... 7<br>FEMALE CONDOM ..... 8<br>DIAPHRAGM ..... 9<br>FOAM/JELLY ..... 10<br>EMERGENCY CONTRACEPTION ..... 11<br>STANDARD DAYS/ CALENDAR METHOI ..... 12<br>LACTATIONAL AMEN. METHOD ..... 13<br>RHYTHM METHOD ..... 14<br>WITHDRAWAL ..... 15<br>N TABLET ..... 16<br>OTHER ..... 17<br>NONE ..... 18<br>DON'T KNOW/REMEMBER ..... 88<br>REFUSED ..... 99                                                                                                                                                                                                                          | 579  |
| 556                | Where did you obtain [THE LAST/CURRENT METHOD] the last time?<br><br>PROBE TO IDENTIFY THE TYPE OF SOURCE.<br><br>[Only for methods 1-11 in Question 545/555]                                                                         | <b>PUBLIC SECTOR</b><br>GOVT. HOSPITAL/POLYCL ..... 11<br>GOVT. HEALTH CENTER/CLINIC ..... 12<br>GOVT. HEALTH POST/CHPS ..... 13<br>FAMILY PLANNING CLINIC ..... 14<br>MOBILE CLINIC ..... 15<br>FIELDWORKER/O ..... 16<br>OTHER PUBLIC SECTOR ..... 17<br>(SPECIFY) _____<br><b>PRIVATE MEDICAL SECTOR</b><br>PRIVATE HOSPITAL/CLINIC ..... 18<br>PRIVATE DOCTOR ..... 19<br>PHARMACY ..... 20<br>CHEMICAL/DRUG STORE ..... 21<br>FP/PPAG CLINIC ..... 22<br>MATERNITY HOME ..... 23<br>OTHER PRIVATE MEDICAL ..... 24<br>(SPECIFY) _____<br><b>OTHER SOURCE</b><br>SHOP/MARKET ..... 25<br>COMMUNITY VOLUNTEER ..... 26<br>FRIEND/RELATIVE ..... 27<br>OTHER ..... 96<br>(SPECIFY) _____<br>DON'T KNOW ..... 88<br>REFUSED ..... 99 | 557  |
| 556 B              | What was the name of the facility                                                                                                                                                                                                     | NAME OF FACILITY _____                                                                                                                                                                                                                                                                                                                                                                                                                                                                                                                                                                                                                                                                                                                |      |
| 557                | How many kilometers did you have to travel to reach this (SERVICE PROVIDER) to receive (LAST/CURRENT METHOD)?<br><br>[Only for methods 1-11 in Question 545/555]                                                                      | KM ..... <input type="text"/><br>DON'T KNOW ..... 88<br>REFUSED ..... 99                                                                                                                                                                                                                                                                                                                                                                                                                                                                                                                                                                                                                                                              |      |

| 5. FAMILY PLANNING |                                                                                                                                                                                                       |                         |                      |                      |         |
|--------------------|-------------------------------------------------------------------------------------------------------------------------------------------------------------------------------------------------------|-------------------------|----------------------|----------------------|---------|
| NO.                | QUESTIONS AND FILTERS                                                                                                                                                                                 | CODING CATEGORIES       |                      |                      | SKIP    |
| 558                | How many minutes did it take for you to travel to this (SERVICE PROVIDER) to receive [THE LAST/CURRENT METHOD]?<br>[Only for methods 1-11 in Question 545/555]                                        | MINUTES .....           | <input type="text"/> | <input type="text"/> |         |
|                    |                                                                                                                                                                                                       | REFUSED .....           | 99                   |                      |         |
| 559                | What mode(s) of transportation did you use to travel to this (SERVICE PROVIDER) to receive [THE LAST/CURRENT METHOD]?<br>[Only for methods 1-11 in Question 545/555]                                  | NONE (RECEIVED AT HOME) |                      |                      | 1       |
|                    |                                                                                                                                                                                                       | WALK                    |                      |                      | 2       |
|                    |                                                                                                                                                                                                       | BICYCLE                 |                      |                      | 3       |
|                    |                                                                                                                                                                                                       | MOTORCYCLE .....        |                      |                      | 4       |
|                    |                                                                                                                                                                                                       | BUS .....               |                      |                      | 5       |
|                    |                                                                                                                                                                                                       | CAR / TAXI              |                      |                      | 6       |
|                    |                                                                                                                                                                                                       | OTHER .....             |                      |                      | 96      |
|                    |                                                                                                                                                                                                       | REFUSED .....           |                      |                      | 99      |
| 560                | How much, in Ghanaian cedis, did you have to pay in total to obtain [THE LAST/CURRENT METHOD]?<br>IF NONE ENTER '00'<br>IF REFUSED ENTER '99'<br>[Only for methods 1-11 in Question 545/555]          | COST OF METHOD          | <input type="text"/> | <input type="text"/> |         |
|                    |                                                                                                                                                                                                       | COST OF SERVICE         | <input type="text"/> | <input type="text"/> |         |
|                    |                                                                                                                                                                                                       | TRANSPORTATION          | <input type="text"/> | <input type="text"/> |         |
|                    |                                                                                                                                                                                                       | LOST WAGES              | <input type="text"/> | <input type="text"/> |         |
|                    |                                                                                                                                                                                                       | CHILDCARE ..            | <input type="text"/> | <input type="text"/> |         |
| 561                | How many minutes did you have to wait at the (SERVICE PROVIDER) before you received [THE LAST/CURRENT METHOD]?<br>[Only for methods 1-11 in Question 545/555]<br>IF REFUSED ENTER '9999'              | MINUTES .....           | <input type="text"/> | <input type="text"/> |         |
| 562                | Did you feel that you got enough information about [THE LAST/CURRENT METHOD]?<br>[Only for methods 1-11 in Question 545/555]                                                                          | YES .....               |                      |                      | 1       |
|                    |                                                                                                                                                                                                       | NO .....                |                      |                      | 2       |
|                    |                                                                                                                                                                                                       | DON'T KNOW .....        |                      |                      | 88      |
|                    |                                                                                                                                                                                                       | REFUSED .....           |                      |                      | 99      |
| 563                | Did you receive any counseling or information from a health or family planning worker about [THE LAST/CURRENT METHOD]?<br>[Only for methods 1-11 in Question 545/555]                                 | YES .....               |                      |                      | 1       |
|                    |                                                                                                                                                                                                       | NO .....                |                      |                      | 2 → 572 |
|                    |                                                                                                                                                                                                       | DON'T KNOW .....        |                      |                      | 88      |
|                    |                                                                                                                                                                                                       | REFUSED .....           |                      |                      | 99      |
| 564                | Did the person who counseled you explain how [THE LAST/CURRENT METHOD] works to prevent pregnancy?<br>[Only for methods 1-11 in Question 545/555]                                                     | YES .....               |                      |                      | 1       |
|                    |                                                                                                                                                                                                       | NO .....                |                      |                      | 2       |
|                    |                                                                                                                                                                                                       | DON'T KNOW .....        |                      |                      | 88      |
|                    |                                                                                                                                                                                                       | REFUSED .....           |                      |                      | 99      |
| 565                | Did the person who counseled you on [THE LAST/CURRENT METHOD] explain how to use it?<br>[Only for methods 1-11 in Question 545/555]                                                                   | YES .....               |                      |                      | 1       |
|                    |                                                                                                                                                                                                       | NO .....                |                      |                      | 2       |
|                    |                                                                                                                                                                                                       | DON'T KNOW .....        |                      |                      | 88      |
|                    |                                                                                                                                                                                                       | REFUSED .....           |                      |                      | 99      |
| 566                | Did the person who counseled you allow you to ask questions?<br>[Only for methods 1-11 in Question 545/555]                                                                                           | YES .....               |                      |                      | 1       |
|                    |                                                                                                                                                                                                       | NO .....                |                      |                      | 2       |
|                    |                                                                                                                                                                                                       | DON'T KNOW .....        |                      |                      | 88      |
|                    |                                                                                                                                                                                                       | REFUSED .....           |                      |                      | 99      |
| 567                | When you got [THE LAST/CURRENT METHOD], were you told by a health or family planning worker about other methods of family planning that you could use?<br>[Only for methods 1-11 in Question 545/555] | YES .....               |                      |                      | 1       |
|                    |                                                                                                                                                                                                       | NO .....                |                      |                      | 2       |
|                    |                                                                                                                                                                                                       | DON'T KNOW .....        |                      |                      | 88      |
|                    |                                                                                                                                                                                                       | REFUSED .....           |                      |                      | 99      |



**5. FAMILY PLANNING**

| NO. | QUESTIONS AND FILTERS                                                                                                                                                                                                      | CODING CATEGORIES                                                    | SKIP  |
|-----|----------------------------------------------------------------------------------------------------------------------------------------------------------------------------------------------------------------------------|----------------------------------------------------------------------|-------|
| 568 | When you got [THE LAST/CURRENT METHOD], were you told by a health or family planning worker about potential side effects or problems you might have with the method(s)?<br><br>[Only for methods 1-11 in Question 545/555] | YES ..... 1<br>NO ..... 2<br>DON'T KNOW ..... 88<br>REFUSED ..... 99 |       |
| 569 | When you got [THE LAST/CURRENT METHOD], were you told what to do if you experienced side effects or problems?<br><br>[Only for methods 1-11 in Question 545/555]                                                           | YES ..... 1<br>NO ..... 2<br>DON'T KNOW ..... 88<br>REFUSED ..... 99 |       |
| 570 | When you got [THE LAST/CURRENT METHOD], were you told about any benefits?<br><br>[Only for methods 1-11 in Question 545/555]                                                                                               | YES ..... 1<br>NO ..... 2<br>DON'T KNOW ..... 88<br>REFUSED ..... 99 |       |
| 571 | When you got [THE LAST/CURRENT METHOD], were you told of any disadvantages?<br><br>[Only for methods 1-11 in Question 545/555]                                                                                             | YES ..... 1<br>NO ..... 2<br>DON'T KNOW ..... 88<br>REFUSED ..... 99 |       |
| 576 | Was the method you wanted available to you?<br><br>[Only for methods 1-11 in Question 545/555]                                                                                                                             | YES ..... 1<br>NO ..... 2<br>DON'T KNOW ..... 88<br>REFUSED ..... 99 | → 585 |

| 5. FAMILY PLANNING |                                                                                                                                                      |                                                                                                                                                                                                                                                                                                                                                                                                                                                                                                              |      |
|--------------------|------------------------------------------------------------------------------------------------------------------------------------------------------|--------------------------------------------------------------------------------------------------------------------------------------------------------------------------------------------------------------------------------------------------------------------------------------------------------------------------------------------------------------------------------------------------------------------------------------------------------------------------------------------------------------|------|
| NO.                | QUESTIONS AND FILTERS                                                                                                                                | CODING CATEGORIES                                                                                                                                                                                                                                                                                                                                                                                                                                                                                            | SKIP |
| 577                | What method had you wanted during that visit?<br><br>RECORD ALL MENTIONED.                                                                           | FEMALE STERILIZATION ..... 1<br>MALE STERILIZATION ..... 2<br>IUD ..... 3<br>INJECTABLES ..... 4<br>IMPLANTS ..... 5<br>PILL ..... 6<br>CONDOM ..... 7<br>FEMALE CONDOM ..... 8<br>DIAPHRAGM ..... 9<br>FOAM/JELLY ..... 10<br>EMERGENCY CONTRACEPTION ..... 11<br>STANDARD DAYS/ CALENDAR METHOI ..... 12<br>LACTATIONAL AMEN. METHOD ..... 13<br>RHYTHM METHOD ..... 14<br>WITHDRAWAL ..... 15<br>N TABLET ..... 16<br>OTHER ..... 17<br>NONE ..... 18<br>DON'T KNOW/REMEMBER ..... 88<br>REFUSED ..... 99 |      |
| 578                | What was the MOST important reason didn't you obtain the method you wanted?                                                                          | METHOD OUT OF STOCK THAT DAY ..... 1<br>METHOD NOT AVAILABLE AT ALL ..... 2<br>PROVIDER NOT TRAINED TO PROVIDE METHOD ..... 3<br>PROVIDER RECOMMENDED ANOTHER METHOD ..... 4<br>NOT ELIGIBLE FOR METHOD ..... 5<br>DECIDED NOT TO ADOPT A METHOD ..... 6<br>DECIDED TO ADOPT ANOTHER METHOD ..... 7<br>TOO COSTLY ..... 8<br>HUSBAND/PARTNER REFUSED ..... 9<br>OTHER, SPECIFY ..... 11<br>DON'T KNOW ..... 88<br>REFUSED ..... 99                                                                           |      |
| 572                | Did you feel pressured into using [THE LAST/CURRENT METHOD]?<br>[Only for methods 1-11 in Question 545/555]                                          | YES ..... 1<br>NO ..... 2<br>DON'T KNOW ..... 88<br>REFUSED ..... 99                                                                                                                                                                                                                                                                                                                                                                                                                                         |      |
| 573                | Did you feel you could say no to [THE LAST/CURRENT METHOD]?<br>[Only for methods 1-11 in Question 545/555]                                           | YES ..... 1<br>NO ..... 2<br>DON'T KNOW ..... 88<br>REFUSED ..... 99                                                                                                                                                                                                                                                                                                                                                                                                                                         |      |
| 574                | Has the [THE LAST/CURRENT METHOD] caused any problems?<br>[Only for methods 1-11 in Question 545/555]                                                | YES ..... 1<br>NO ..... 2<br>DON'T KNOW ..... 88<br>REFUSED ..... 99                                                                                                                                                                                                                                                                                                                                                                                                                                         |      |
| 575                | Do you feel that you have access to a wide range of family planning methods, or only to a select few?<br>[Only for methods 1-11 in Question 545/555] | A WIDE RANGE ..... 1<br>A SELECT FEW ..... 2<br>DON'T KNOW ..... 88<br>REFUSED ..... 99                                                                                                                                                                                                                                                                                                                                                                                                                      |      |
| 579                | CHECK Q. 539:<br><br>NEVER USED FAMILY PLANNING <input type="checkbox"/><br>EVER USED FAMILY PLANNING <input type="checkbox"/>                       |                                                                                                                                                                                                                                                                                                                                                                                                                                                                                                              | 585  |
| 580                | Do you feel that you have access to a wide range of family planning methods?<br><br>READ OPTIONS ALOUD                                               | A WIDE RANGE ..... 1<br>A SELECT FEW ..... 2<br>NO ACCESS ..... 3<br>DON'T KNOW ..... 88<br>REFUSED ..... 99                                                                                                                                                                                                                                                                                                                                                                                                 |      |
| 581                | Have you ever wanted to use a method of family planning?                                                                                             | YES ..... 1<br>NO ..... 2<br>DON'T KNOW ..... 88<br>REFUSED ..... 99                                                                                                                                                                                                                                                                                                                                                                                                                                         | 585  |
| 582                | Is the method of family planning you would want to use available to you?                                                                             | YES ..... 1<br>NO ..... 2<br>DON'T KNOW ..... 88<br>REFUSED ..... 99                                                                                                                                                                                                                                                                                                                                                                                                                                         |      |

**5. FAMILY PLANNING**

| NO.                                                          | QUESTIONS AND FILTERS                                                                                                                                                                                                                                                                                                                 | CODING CATEGORIES                                                                                                                                                                                                                                                                                                                                                                                                                                                                                            | SKIP |
|--------------------------------------------------------------|---------------------------------------------------------------------------------------------------------------------------------------------------------------------------------------------------------------------------------------------------------------------------------------------------------------------------------------|--------------------------------------------------------------------------------------------------------------------------------------------------------------------------------------------------------------------------------------------------------------------------------------------------------------------------------------------------------------------------------------------------------------------------------------------------------------------------------------------------------------|------|
| 583                                                          | What method do you want or have you wanted most recently?<br><br>RECORD ALL MENTIONED.                                                                                                                                                                                                                                                | FEMALE STERILIZATION ..... 1<br>MALE STERILIZATION ..... 2<br>IUD ..... 3<br>INJECTABLES ..... 4<br>IMPLANTS ..... 5<br>PILL ..... 6<br>CONDOM ..... 7<br>FEMALE CONDOM ..... 8<br>DIAPHRAGM ..... 9<br>FOAM/JELLY ..... 10<br>EMERGENCY CONTRACEPTION ..... 11<br>STANDARD DAYS/ CALENDAR METHOI ..... 12<br>LACTATIONAL AMEN. METHOD ..... 13<br>RHYTHM METHOD ..... 14<br>WITHDRAWAL ..... 15<br>N TABLET ..... 16<br>OTHER ..... 17<br>NONE ..... 18<br>DON'T KNOW/REMEMBER ..... 88<br>REFUSED ..... 99 |      |
| 584                                                          | What is the MOST important reason you have not obtained the method you wanted?                                                                                                                                                                                                                                                        | METHOD OUT OF STOCK ..... 1<br>METHOD NOT AVAILABLE AT ALL ..... 2<br>PROVIDER NOT TRAINED TO PROVIDE METHOD ..... 3<br>PROVIDER RECOMMENDED ANOTHER METHOD ..... 4<br>NOT ELIGIBLE FOR METHOD ..... 5<br>DECIDED NOT TO ADOPT A METHOD ..... 6<br>DECIDED TO ADOPT ANOTHER METHOD ..... 7<br>TOO COSTLY ..... 8<br>HUSBAND/PARTNER REFUSED ..... 9<br>DIFFICULT TO ACCESS HEALTH CENTER ..... 10<br>OTHER, SPECIFY ..... 11<br>DON'T KNOW ..... 88<br>REFUSED ..... 99                                      |      |
| <b>CHECK IF MARRIED OR LIVING TOGETHER AS IF MARRIED=YES</b> |                                                                                                                                                                                                                                                                                                                                       |                                                                                                                                                                                                                                                                                                                                                                                                                                                                                                              |      |
| 585                                                          | Does your husband/partner support you in your choices related to contraceptive use?                                                                                                                                                                                                                                                   | YES ..... 1<br>NO ..... 2<br>DON'T KNOW ..... 88<br>REFUSED ..... 99                                                                                                                                                                                                                                                                                                                                                                                                                                         |      |
| 586                                                          | CHECK:<br>ANY BIRTH OR PREGNANCY TERMINATION AFTER MONTH AND YEAR OF START OF USE OF CONTRACEPTION IN Q. 546      YES <input type="checkbox"/> NO <input type="checkbox"/><br>GO BACK TO <b>546</b> PROBE AND RECORD MONTH AND YEAR AT START OF CONTINUOUS USE OF CURRENT METHOD (MUST BE AFTER LAST BIRTH OR PREGNANCY TERMINATION). |                                                                                                                                                                                                                                                                                                                                                                                                                                                                                                              |      |

| 5. FAMILY PLANNING |                                                                                                                                                                                                                                                                                                                                                                                                                                                                                                                                                                                                                                                                                                                                                                                                                                                                                                                                                                                                                                                                                                                                                                                                                                                                                                                                                                                                                                                                                                                                                                                                              |                                                                                                                                                                                                                                               |      |
|--------------------|--------------------------------------------------------------------------------------------------------------------------------------------------------------------------------------------------------------------------------------------------------------------------------------------------------------------------------------------------------------------------------------------------------------------------------------------------------------------------------------------------------------------------------------------------------------------------------------------------------------------------------------------------------------------------------------------------------------------------------------------------------------------------------------------------------------------------------------------------------------------------------------------------------------------------------------------------------------------------------------------------------------------------------------------------------------------------------------------------------------------------------------------------------------------------------------------------------------------------------------------------------------------------------------------------------------------------------------------------------------------------------------------------------------------------------------------------------------------------------------------------------------------------------------------------------------------------------------------------------------|-----------------------------------------------------------------------------------------------------------------------------------------------------------------------------------------------------------------------------------------------|------|
| NO.                | QUESTIONS AND FILTERS                                                                                                                                                                                                                                                                                                                                                                                                                                                                                                                                                                                                                                                                                                                                                                                                                                                                                                                                                                                                                                                                                                                                                                                                                                                                                                                                                                                                                                                                                                                                                                                        | CODING CATEGORIES                                                                                                                                                                                                                             | SKIP |
| 587                | <p>CHECK Q. 546</p> <p>JULY 2015 (6) OR LATER </p> <p><b>C</b> ENTER CODE FOR METHOD USED IN MONTH OF INTERVIEW IN THE CALENDAR AND IN EACH MONTH BACK TO THE DATE STARTED USING.</p>                                                                                                                                                                                                                                                                                                                                                                                                                                                                                                                                                                                                                                                                                                                                                                                                                                                                                                                                                                                                                                                                                                                                                                                                                                                                                                                                       | <p>YEAR IS 2015 (7) OR EARLIER </p> <p><b>C</b> ENTER CODE FOR METHOD USED IN MONTH OF INTERVIEW IN THE CALENDAR AND EACH MONTH BACK TO JULY 2015 (6).</p> |      |
| 588                | <p>I would like to ask you some questions about the times you or your husband/partner may have used a method to avoid getting pregnant during the last 30 months.</p> <p>USE CALENDAR TO PROBE FOR EARLIER PERIODS OF USE AND NONUSE, STARTING WITH MOST RECENT USE, BACK TO JULY 2015. (6)<br/>USE NAMES OF CHILDREN, DATES OF BIRTH, AND PERIODS OF PREGNANCY AS REFERENCE POINTS.</p> <p><b>C</b> <b>IN COLUMN 1</b>, ENTER METHOD USE CODE OR '0' FOR NONUSE IN EACH BLANK MONTH.</p> <p>ILLUSTRATIVE QUESTIONS:</p> <ul style="list-style-type: none"> <li>* When was the last time you used a method? Which method was that?</li> <li>* When did you start using that method? How long after the birth of (NAME)?</li> <li>* How long did you use the method then?</li> </ul> <p><b>IN COLUMN 2</b>, ENTER CODES FOR DISCONTINUATION NEXT TO THE LAST MONTH OF USE. NUMBER OF CODES IN COLUMN 2 MUST BE SAME AS NUMBER OF INTERRUPTIONS OF METHOD USE IN COLUMN 1.</p> <p>ASK WHY SHE STOPPED USING THE METHOD. IF A PREGNANCY FOLLOWED, ASK WHETHER SHE BECAME PREGNANT UNINTENTIONALLY WHILE USING THE METHOD OR DELIBERATELY STOPPED TO GET PREGNANT.</p> <p>ILLUSTRATIVE QUESTIONS:</p> <ul style="list-style-type: none"> <li>* Why did you stop using the (METHOD)? Did you become pregnant while using (METHOD), or did you stop to get pregnant, or did you stop for some other reason?</li> <li>* IF DELIBERATELY STOPPED TO BECOME PREGNANT, ASK: How many months did it take you to get pregnant after you stopped using (METHOD)? AND ENTER '0' IN EACH SUCH MONTH IN COLUMN 1.</li> </ul> |                                                                                                                                                                                                                                               |      |



|       |                                                                                                                                                                                                                                                                    |                                                                                                                                                                                                                                                                                                                                                                                                                                                                                                                                       |
|-------|--------------------------------------------------------------------------------------------------------------------------------------------------------------------------------------------------------------------------------------------------------------------|---------------------------------------------------------------------------------------------------------------------------------------------------------------------------------------------------------------------------------------------------------------------------------------------------------------------------------------------------------------------------------------------------------------------------------------------------------------------------------------------------------------------------------------|
| 607   | <p>Where did you receive antenatal care for this pregnancy?</p> <p>Anywhere else?</p> <p>PROBE TO IDENTIFY THE TYPE OF SOURCE.</p> <p>IF UNABLE TO DETERMINE IF PUBLIC OR PRIVATE SECTOR,<br/>WRITE THE NAME OF THE PLACE.</p> <p>_____</p> <p>(NAME OF PLACE)</p> | <p><b>HOME</b></p> <p>RESPONDENT'S HOME 1</p> <p>OTHER HOME 2</p> <p><b>PUBLIC SECTOR</b></p> <p>GOV'T HOSPITAL 3</p> <p>GOV'T HEALTH CENTER/CLINIC 4</p> <p>GOV'T HEALTH POST/CHPS 5</p> <p>MOBILE CLINIC 6</p> <p>OTHER PUBLIC SECTOR 7</p> <p>_____ (SPECIFY)</p> <p><b>PRIVATE MEDICAL SECTOR</b></p> <p>PVT. HOSPITAL/ CLINIC 8</p> <p>FP/PPAG CLINIC 9</p> <p>MOBILE CLINIC MATERNITY HOME 10</p> <p>11</p> <p>OTHER PRIVATE MED. SECTOR 12</p> <p>_____ (SPECIFY)</p> <p>OTHER _____ 96</p> <p>(SPECIFY)</p> <p>REFUSED 99</p> |
| G_6_1 | <p>Did you have a maternal health book (Pink Book) for this pregnancy?</p> <p><i>If yes, ask to see it and use pink book to confirm responses below</i></p>                                                                                                        | <p>YES ..... 1</p> <p>NO ..... 2</p> <p>REFUSED 99</p>                                                                                                                                                                                                                                                                                                                                                                                                                                                                                |
| 608   | <p>How many months pregnant were you when you first received antenatal care for this pregnancy?</p>                                                                                                                                                                | <p>MONTHS <input type="text"/></p> <p>OBSERVED 1</p> <p>REPORTED 2</p> <p>DON'T KNOW 88</p> <p>REFUSED 99</p>                                                                                                                                                                                                                                                                                                                                                                                                                         |
| 609   | <p>How many times did you receive antenatal care during this pregnancy (at facility or visit at home by provider)?</p>                                                                                                                                             | <p>NUMBER OF TIMES <input type="text"/></p> <p>OBSERVED 1</p> <p>REPORTED 2</p> <p>DON'T KNOW 88</p> <p>REFUSED 99</p>                                                                                                                                                                                                                                                                                                                                                                                                                |
| 610   | <p>Did you ever receive counseling on family planning during your antenatal care?</p>                                                                                                                                                                              | <p>YES ..... 1</p> <p>NO ..... 2</p> <p>REFUSED 99</p>                                                                                                                                                                                                                                                                                                                                                                                                                                                                                |

|     |                                                                                                                                                                                                                                                                                |                                                                                                                                                                                                                                                                                                                                                                                                                                                                                                                                                     |
|-----|--------------------------------------------------------------------------------------------------------------------------------------------------------------------------------------------------------------------------------------------------------------------------------|-----------------------------------------------------------------------------------------------------------------------------------------------------------------------------------------------------------------------------------------------------------------------------------------------------------------------------------------------------------------------------------------------------------------------------------------------------------------------------------------------------------------------------------------------------|
| 611 | <p>Did anyone assist with the delivery of this baby? Who assisted?</p> <p>Anyone else?</p> <p>PROBE FOR THE TYPE(S) OF PERSONS(S) AND RECORD ALL MENTIONED.</p> <p>IF RESPONDENT SAYS NO ONE ASSISTED, PROBE TO DETERMINE WHETHER ANY ADULTS WERE PRESENT AT THE DELIVERY.</p> | <p><b>HEALTH PERSONNEL</b></p> <p>DOCTOR ... 1</p> <p>NURSE/MIDWIFE 2</p> <p>COM. HEALTH OFFICER/ NURSE ..... 3</p> <p><b>OTHER PERSON</b></p> <p>TRAD. BIRTH ATTENDANT/ TBA 4</p> <p>VILLAGE HEALTH VOLUNTEER 5</p> <p>TRAD. HEALTH PRACTITIONER 6</p> <p>RELATIVE/NEIGHBOUR/FRIEND 7</p> <p>OTHER 8</p> <p>_____ (SPECIFY)</p> <p>NO ONE ASSISTED 10</p> <p>DON'T KNOW 88</p> <p>REFUSED 99</p>                                                                                                                                                   |
| 612 | <p>Where did you give birth?</p> <p>PROBE FOR THE TYPE OF SOURCE.</p> <p>IF UNABLE TO DETERMINE IF PUBLIC OR PRIVATE SECTOR, WRITE THE NAME OF THE PLACE.</p> <p>_____ (NAME OF PLACE)</p>                                                                                     | <p><b>HOME</b></p> <p>RESPONDENT'S HOME 11</p> <p>OTHER HOME 12</p> <p><b>PUBLIC SECTOR</b></p> <p>GOV'T HOSPITAL 21</p> <p>GOV'T HEALTH CENTER/CLINIC 22</p> <p>GOV'T HEALTH POST CHPS 23</p> <p>MOBILE CLINIC 24</p> <p>OTHER PUBLIC SECTOR 26</p> <p>_____ (SPECIFY)</p> <p><b>PRIVATE MEDICAL SECTOR</b></p> <p>PVT. HOSPITAL/ CLINIC 31</p> <p>FP/PPAG CLINIC 32</p> <p>MOBILE CLINIC 33</p> <p>MATERNITY HOME 34</p> <p>OTHER PRIVATE MED SECTOR 36</p> <p>_____ (SPECIFY)</p> <p><b>OTHER</b> 96</p> <p>_____ (SPECIFY)</p> <p>REFUSE 99</p> |

|     |                                                                                                   |                                                                                             |
|-----|---------------------------------------------------------------------------------------------------|---------------------------------------------------------------------------------------------|
| 613 | Did you have a post-natal care visit for this child at any time in the six weeks after the birth? | YES ..... 1<br>NO ..... 2<br>NO, BABY DIED..... 3<br>DON'T KNOW ..... 88<br>REFUSE ..... 99 |
| 614 | Did you receive family planning counseling at any post-natal visit?                               | YES ..... 1<br>NO ..... 2<br>DON'T KNOW ..... 88<br>REFUSE ..... 99                         |



**7. MARRIAGE**

| NO.    | QUESTIONS AND FILTERS                                                                                                                                                                                                                                                                                                                                                                                                                                                                                                                                                                         | CODING CATEGORIES                                                                                                                                                                                                                                           | SKIP       |
|--------|-----------------------------------------------------------------------------------------------------------------------------------------------------------------------------------------------------------------------------------------------------------------------------------------------------------------------------------------------------------------------------------------------------------------------------------------------------------------------------------------------------------------------------------------------------------------------------------------------|-------------------------------------------------------------------------------------------------------------------------------------------------------------------------------------------------------------------------------------------------------------|------------|
| 701    | CHECK 107:<br><div style="display: flex; justify-content: space-around; align-items: center;"> <div style="text-align: center;"> <input type="checkbox"/><br/>           EVER MARRIED/<br/>PARTNER         </div> <div style="text-align: center;"> <input type="checkbox"/><br/>           NEVER MARRIED/<br/>LIVED WITH A MAN         </div> </div>                                                                                                                                                                                                                                         |                                                                                                                                                                                                                                                             | 801        |
| GS_7_1 | Does your (husband/partner) have other wives or does he live with other women as if married?                                                                                                                                                                                                                                                                                                                                                                                                                                                                                                  | YES ..... 1<br>NO ..... 2<br>DON'T KNOW ..... 8<br>REFUSED ..... 99                                                                                                                                                                                         | 703        |
| GS_7_2 | Including yourself, in total, how many wives or live-in partners does he have?                                                                                                                                                                                                                                                                                                                                                                                                                                                                                                                | TOTAL NUMBER OF WIVES<br>AND LIVE-IN PARTNERS ... <input type="text"/> <input type="text"/><br>DON'T KNOW ..... 98<br>REFUSED ..... 99                                                                                                                      |            |
| GS_7_3 | Are you the first, second, ... wife?<br>IF REFUSED, ENTER '99'                                                                                                                                                                                                                                                                                                                                                                                                                                                                                                                                | RANK ..... <input type="text"/> <input type="text"/>                                                                                                                                                                                                        |            |
| 706    | Does your husband/partner currently live with you?                                                                                                                                                                                                                                                                                                                                                                                                                                                                                                                                            | YES ..... 1<br>NO ..... 2<br>REFUSED ..... 99                                                                                                                                                                                                               | 703<br>703 |
| 707    | How long has your husband/partner been away?<br>RECORD IN UNIT RESPONDENT USES                                                                                                                                                                                                                                                                                                                                                                                                                                                                                                                | MONTHS ..... <input type="text"/> <input type="text"/><br>WEEKS ..... <input type="text"/> <input type="text"/><br>YEARS ..... <input type="text"/> <input type="text"/><br>DON'T KNOW ..... 88<br>REFUSED ..... 99                                         |            |
| 703    | Have you been married or lived with a man only once or more than once?                                                                                                                                                                                                                                                                                                                                                                                                                                                                                                                        | ONLY ONCE ..... 1<br>MORE THAN ONCE ..... 2<br>REFUSED ..... 99                                                                                                                                                                                             |            |
| 704    | CHECK 703:<br><div style="display: flex; justify-content: space-around; align-items: center;"> <div style="text-align: center;"> <input type="checkbox"/><br/>           MARRIED/<br/>LIVED WITH A MAN<br/>ONLY ONCE         </div> <div style="text-align: center;"> <input type="checkbox"/><br/>           MARRIED/<br/>LIVED WITH A MAN<br/>MORE THAN ONCE         </div> </div> <p>In what month and year did you start living with your (husband/partner)?</p> <p>Now I would like to ask about your first (husband/partner). In what month and year did you start living with him?</p> | MONTH ..... <input type="text"/> <input type="text"/><br>DON'T KNOW MONT ..... 98<br>REFUSED ..... 99<br>YEAR ..... <input type="text"/> <input type="text"/> <input type="text"/> <input type="text"/><br>DON'T KNOW YEAR ..... 8888<br>REFUSED ..... 9999 |            |
| 705    | How old were you when you first started living with him?<br>IF REFUSED ENTER '99'                                                                                                                                                                                                                                                                                                                                                                                                                                                                                                             | AGE ..... <input type="text"/> <input type="text"/>                                                                                                                                                                                                         |            |

**SECTION 8. FERTILITY PREFERENCES & CONTRACEPTION**

| NO. | QUESTIONS AND FILTERS                                                                                                                                                                                                                                                                                                           | CODING CATEGORIES                                                                                                                                                                                                                                                                                                                                                                                                                                                                                       | SKIP              |  |  |  |  |  |  |  |                   |
|-----|---------------------------------------------------------------------------------------------------------------------------------------------------------------------------------------------------------------------------------------------------------------------------------------------------------------------------------|---------------------------------------------------------------------------------------------------------------------------------------------------------------------------------------------------------------------------------------------------------------------------------------------------------------------------------------------------------------------------------------------------------------------------------------------------------------------------------------------------------|-------------------|--|--|--|--|--|--|--|-------------------|
| 801 | CHECK 545:<br><br>NEITHER HE OR SHE<br>STERILIZED <input type="checkbox"/>                                                                                                                                                                                                                                                      | HE OR SHE<br>STERILIZED <input type="checkbox"/>                                                                                                                                                                                                                                                                                                                                                                                                                                                        | SECTION<br>9      |  |  |  |  |  |  |  |                   |
| 802 | CHECK 420:<br><br>PREGNANT <input type="checkbox"/>                                                                                                                                                                                                                                                                             | NOT PREGNANT<br>OR UNSURE <input type="checkbox"/>                                                                                                                                                                                                                                                                                                                                                                                                                                                      | 804               |  |  |  |  |  |  |  |                   |
| 803 | Now I have some questions about the future. After the child you are expecting now, would you like to have another child, or would you prefer not to have any more children?                                                                                                                                                     | HAVE ANOTHER CHILD ..... 1<br>NO MORE ..... 2<br>UNDECIDED/DON'T KNOW ..... 88<br>REFUSE! .. . . . . . 99                                                                                                                                                                                                                                                                                                                                                                                               | 805<br>811        |  |  |  |  |  |  |  |                   |
| 804 | Now I have some questions about the future. Would you like to have (a/another) child, or would you prefer not to have any (more) children?                                                                                                                                                                                      | HAVE (A/ANOTHER) CHILD ..... 1<br>NO MORE/NONE ..... 2<br>SAYS SHE CAN'T GET PREGNANT ..... 3<br>UNDECIDED/DON'T KNOW ..... '88<br>REFUSE! .. . . . . . 99                                                                                                                                                                                                                                                                                                                                              | 807<br>812<br>810 |  |  |  |  |  |  |  |                   |
| 805 | CHECK 420:<br><br>NOT PREGNANT<br>OR UNSURE <input type="checkbox"/> PREGNANT <input type="checkbox"/><br><br>a) How long would you like to wait from now before the birth of (a/another) child?      b) After the birth of the child you are expecting now, how long would you like to wait before the birth of another child? | MONTHS ..... 1 <table border="1" style="display: inline-table; vertical-align: middle;"><tr><td> </td><td> </td></tr><tr><td> </td><td> </td></tr></table><br>YEARS ..... 2 <table border="1" style="display: inline-table; vertical-align: middle;"><tr><td> </td><td> </td></tr><tr><td> </td><td> </td></tr></table><br>SOON/NOW ..... 93<br>SAYS SHE CAN'T GET PREGNANT ..... 94<br>AFTER MARRIAGE ..... 95<br><br>OTHER _____ (SPECIFY) ..... 96<br>DON'T KNOW ..... 98<br>REFUSE! .. . . . . . 99 |                   |  |  |  |  |  |  |  | 810<br>812<br>810 |
|     |                                                                                                                                                                                                                                                                                                                                 |                                                                                                                                                                                                                                                                                                                                                                                                                                                                                                         |                   |  |  |  |  |  |  |  |                   |
|     |                                                                                                                                                                                                                                                                                                                                 |                                                                                                                                                                                                                                                                                                                                                                                                                                                                                                         |                   |  |  |  |  |  |  |  |                   |
|     |                                                                                                                                                                                                                                                                                                                                 |                                                                                                                                                                                                                                                                                                                                                                                                                                                                                                         |                   |  |  |  |  |  |  |  |                   |
|     |                                                                                                                                                                                                                                                                                                                                 |                                                                                                                                                                                                                                                                                                                                                                                                                                                                                                         |                   |  |  |  |  |  |  |  |                   |
| 806 | CHECK 420:<br><br>NOT PREGNANT<br>OR UNSURE <input type="checkbox"/>                                                                                                                                                                                                                                                            | PREGNANT <input type="checkbox"/>                                                                                                                                                                                                                                                                                                                                                                                                                                                                       | 811               |  |  |  |  |  |  |  |                   |
| 807 | CHECK 544: USING A CONTRACEPTIVE METHOD?<br><br>NOT<br>CURRENTLY<br>USING <input type="checkbox"/>                                                                                                                                                                                                                              | CURRENTLY<br>USING <input type="checkbox"/>                                                                                                                                                                                                                                                                                                                                                                                                                                                             | 812               |  |  |  |  |  |  |  |                   |
| 808 | CHECK 805:<br><br>'24' OR MORE MONTHS<br>INTEND TO SPACE <input type="checkbox"/><br>OR '02' OR MORE YEARS                                                                                                                                                                                                                      | NOT<br>ASKED <input type="checkbox"/><br><br>'00-23' MONTHS<br>INTEND TO LIMIT <input type="checkbox"/><br>OR '00-01' YEAR                                                                                                                                                                                                                                                                                                                                                                              | 811               |  |  |  |  |  |  |  |                   |

**SECTION 8. FERTILITY PREFERENCES & CONTRACEPTION**

| NO. | QUESTIONS AND FILTERS                                                                                                                                                                                                                                                                                                                                                                                                                                                                                                    | CODING CATEGORIES                                                                                                                                                                                                                                                                                                                                                                                                                                                                                                                                                                                                                                                                                                                                                                                                                                                                                                                                                                                                                                                                                                                                                                                                                                 | SKIP |
|-----|--------------------------------------------------------------------------------------------------------------------------------------------------------------------------------------------------------------------------------------------------------------------------------------------------------------------------------------------------------------------------------------------------------------------------------------------------------------------------------------------------------------------------|---------------------------------------------------------------------------------------------------------------------------------------------------------------------------------------------------------------------------------------------------------------------------------------------------------------------------------------------------------------------------------------------------------------------------------------------------------------------------------------------------------------------------------------------------------------------------------------------------------------------------------------------------------------------------------------------------------------------------------------------------------------------------------------------------------------------------------------------------------------------------------------------------------------------------------------------------------------------------------------------------------------------------------------------------------------------------------------------------------------------------------------------------------------------------------------------------------------------------------------------------|------|
| 809 | <p>CHECK 804:</p> <p>WANTS TO HAVE <input type="checkbox"/> A/ANOTHER CHILD ↓      WANTS NO MORE/ <input type="checkbox"/> NONE ↓</p> <p>a) You have said that you do not want (a/another) child soon. Can you tell me why you are not using a method to prevent pregnancy?      b) You have said that you do not want any (more) children. Can you tell me why you are not using a method to prevent pregnancy?</p> <p>Any other reason?      Any other reason?</p> <p align="center">RECORD ALL REASONS MENTIONED.</p> | <p>NOT MARRIED ..... 1</p> <p><b>FERTILITY-RELATED REASONS</b></p> <p>NOT HAVING SEX ..... 2</p> <p>INFREQUENT SEX ..... 3</p> <p>MENOPAUSAL/HYSTERECTOMY ..... 4</p> <p>CAN'T GET PREGNANT ..... 5</p> <p>NOT MENSTRUATED SINCE LAST BIRTH ..... 6</p> <p>BREASTFEEDING ..... 7</p> <p>UP TO GOD/FATALISTIC ..... 8</p> <p><b>OPPOSITION TO USE</b></p> <p>RESPONDENT OPPOSED ..... 9</p> <p>HUSBAND/PARTNER OPPOSED ..... 10</p> <p>OTHERS OPPOSED ..... 11</p> <p>RELIGIOUS PROHIBITION ..... 12</p> <p>STIGMATIZING TO USE IN COMMUNITY .... 13</p> <p><b>LACK OF KNOWLEDGE</b></p> <p>KNOWS NO METHOD ..... 14</p> <p>KNOWS NO SOURCE ..... 15</p> <p><b>METHOD-RELATED REASONS</b></p> <p>SIDE EFFECTS/HEALTH CONCERNS ..... 16</p> <p>LACK OF ACCESS/TOO FAR ..... 17</p> <p>METHOD COSTS TOO MUCH ..... 18</p> <p>VISIT TO CLINIC COSTS TOO MUCH ..... 19</p> <p>CLINIC OPERATING HOURS LIMITED ..... 20</p> <p>NO DOCTOR OR PROVIDER AVAILABLE ..... 21</p> <p>PREFERRED METHOD NOT AVAILABLE ..... 22</p> <p>NO METHOD AVAILABLE ..... 23</p> <p>INCONVENIENT TO USE ..... 24</p> <p>INTERFERES WITH BODY'S NORMAL PROCESSES ..... 25</p> <p>OTHER _____ 96<br/>(SPECIFY)</p> <p>DON'T KNOW ..... 88</p> <p>REFUSE! .. . . . . . 99</p> |      |
| 810 | <p>CHECK 544: USING A CONTRACEPTIVE METHOD?</p> <p>NOT <input type="checkbox"/> ASKED ↓      NO, NOT <input type="checkbox"/> CURRENTLY USING ↓      YES, <input type="checkbox"/> CURRENTLY USING →</p>                                                                                                                                                                                                                                                                                                                 |                                                                                                                                                                                                                                                                                                                                                                                                                                                                                                                                                                                                                                                                                                                                                                                                                                                                                                                                                                                                                                                                                                                                                                                                                                                   | 812  |
| 811 | <p>Do you think you will use a contraceptive method to delay or avoid pregnancy at any time in the future?</p>                                                                                                                                                                                                                                                                                                                                                                                                           | <p>YES ..... 1</p> <p>NO ..... 2</p> <p>DON'T KNOW ..... 88</p> <p>REFUSE! .. . . . . . 99</p>                                                                                                                                                                                                                                                                                                                                                                                                                                                                                                                                                                                                                                                                                                                                                                                                                                                                                                                                                                                                                                                                                                                                                    |      |
| 812 | <p>CHECK 410 &amp; 412:</p> <p>HAS LIVING <input type="checkbox"/> CHILDREN ↓      NO LIVING <input type="checkbox"/> CHILDREN ↓</p> <p>a) If you could go back to the time you did not have any children and could choose exactly the number of children to have in your whole life, how many would that be?      b) If you could choose exactly the number of children to have in your whole life, how many would that be?</p> <p align="center">PROBE FOR A NUMERIC RESPONSE.</p>                                     | <p>NONE ..... 0 →</p> <p>NUMBER ..... <input type="text"/> <input type="text"/></p> <p>_____</p> <p>DON'T KNOW ..... 88</p> <p>REFUSED ..... 99</p>                                                                                                                                                                                                                                                                                                                                                                                                                                                                                                                                                                                                                                                                                                                                                                                                                                                                                                                                                                                                                                                                                               | 814  |

**SECTION 8. FERTILITY PREFERENCES & CONTRACEPTION**

| NO.  | QUESTIONS AND FILTERS                                                                                                                                                                                                                                                                                                                                                     | CODING CATEGORIES                                                                                                                                                                                                                                                                                                                                                                                   | SKIP  |       |        |  |  |  |  |
|------|---------------------------------------------------------------------------------------------------------------------------------------------------------------------------------------------------------------------------------------------------------------------------------------------------------------------------------------------------------------------------|-----------------------------------------------------------------------------------------------------------------------------------------------------------------------------------------------------------------------------------------------------------------------------------------------------------------------------------------------------------------------------------------------------|-------|-------|--------|--|--|--|--|
| 813  | How many of these children would you like to be boys, how many would you like to be girls and for how many would it not matter if it's a boy or a girl?                                                                                                                                                                                                                   | <table border="1" style="margin-left: auto; margin-right: auto;"> <thead> <tr> <th>BOYS</th> <th>GIRLS</th> <th>EITHER</th> </tr> </thead> <tbody> <tr> <td style="width: 20px; height: 20px;"></td> <td style="width: 20px; height: 20px;"></td> <td style="width: 20px; height: 20px;"></td> </tr> </tbody> </table> <p>NUMBER . . . _____</p> <p>DON'T KNOW ..... 88</p> <p>REFUSED ..... 99</p> | BOYS  | GIRLS | EITHER |  |  |  |  |
| BOYS | GIRLS                                                                                                                                                                                                                                                                                                                                                                     | EITHER                                                                                                                                                                                                                                                                                                                                                                                              |       |       |        |  |  |  |  |
|      |                                                                                                                                                                                                                                                                                                                                                                           |                                                                                                                                                                                                                                                                                                                                                                                                     |       |       |        |  |  |  |  |
| 814  | CHECK 544: USING A CONTRACEPTIVE METHOD?<br>CHECK MARRIAGE: IN A MARRIAGE OR PARTNERSHIP?<br><p align="center">                     NOT CURRENTLY <input type="checkbox"/> AND MARRIED/PARTNER → 817<br/>                     CURRENTLY <input type="checkbox"/> USING AND MARRIED/PARTNER<br/>                     NOT MARRIED/IN PARTNERSHIP → 820                 </p> |                                                                                                                                                                                                                                                                                                                                                                                                     |       |       |        |  |  |  |  |
| 815  | Does your husband/partner know that you are using a method of family planning?                                                                                                                                                                                                                                                                                            | <p>YES ..... 1</p> <p>NO ..... 2</p> <p>DON'T KNOW ..... 88</p> <p>REFUSE!... .. 99</p>                                                                                                                                                                                                                                                                                                             | → 818 |       |        |  |  |  |  |
| 816  | Now I have some questions about your current situation. Would you say that using contraception is mainly your decision, mainly your (husband's/partner's) decision, or did you both decide together?                                                                                                                                                                      | <p>RESPONDENT ..... 1</p> <p>HUSBAND/PARTNER ..... 2</p> <p>RESPONDENT &amp; H ..... 3</p> <p>OTHER _____ 96<br/>(SPECIFY)</p> <p>DON'T KNOW ..... 88</p> <p>REFUSE!... .. 99</p>                                                                                                                                                                                                                   | → 818 |       |        |  |  |  |  |
| 817  | Now I have some questions about your current situation. Would you say that <b>NOT</b> using contraception is mainly your decision, mainly your (husband's/partner's) decision, or did you both decide together?                                                                                                                                                           | <p>RESPONDENT ..... 1</p> <p>HUSBAND/PARTNER ..... 2</p> <p>RESPONDENT &amp; H ..... 3</p> <p>OTHER _____ 96<br/>(SPECIFY)</p> <p>DON'T KNOW ..... 88</p> <p>REFUSE!... .. 99</p>                                                                                                                                                                                                                   |       |       |        |  |  |  |  |
| 818  | Does your (husband/partner) want the same number of children that you want, or does he want more or fewer than you want?                                                                                                                                                                                                                                                  | <p>SAME NUMBER ..... 1</p> <p>MORE CHILDREN ..... 2</p> <p>FEWER CHILDREN ..... 3</p> <p>DON'T KNOW ..... 88</p> <p>REFUSE!... .. 99</p>                                                                                                                                                                                                                                                            |       |       |        |  |  |  |  |
| 819  | If you were to not use/since you are not using any family planning method, how likely do you think it is that you will become pregnant during the next year?                                                                                                                                                                                                              | <p>LIKELY ..... 1</p> <p>UNSURE/NEUTRAL ..... 2</p> <p>UNLIKELY ..... 3</p> <p>REFUSE!... .. 99</p>                                                                                                                                                                                                                                                                                                 |       |       |        |  |  |  |  |
| 820  | CHECK 544: USING A CONTRACEPTIVE METHOD?<br><p align="center">                     CURRENTLY <input type="checkbox"/> USING ↓<br/>                     NOT CURRENTLY <input type="checkbox"/> USING → 825                 </p>                                                                                                                                            |                                                                                                                                                                                                                                                                                                                                                                                                     |       |       |        |  |  |  |  |
| 821  | If you were to continue to use your family planning method, how likely do you think it is that you would become pregnant during the next year?                                                                                                                                                                                                                            | <p>LIKELY ..... 1</p> <p>UNSURE/NEUTRAL ..... 2</p> <p>UNLIKELY ..... 3</p> <p>REFUSE!... .. 99</p>                                                                                                                                                                                                                                                                                                 |       |       |        |  |  |  |  |
| 822  | Different methods of family planning vary in how effective or ineffective they are in preventing pregnancy. How effective do you think that your family planning method is in preventing pregnancy?<br>READ OPTIONS OUT LOUD                                                                                                                                              | <p>EFFECTIVE ..... 1</p> <p>SOMEWHAT EFFE ..... 2</p> <p>UNSURE/NEUTRAL ..... 3</p> <p>SOMEWHAT INEFF ..... 4</p> <p>INEFFECTIVE ..... 5</p> <p>REFUSE!... .. 99</p>                                                                                                                                                                                                                                |       |       |        |  |  |  |  |

**SECTION 8. FERTILITY PREFERENCES & CONTRACEPTION**

| NO. | QUESTIONS AND FILTERS                                                                                                                                                                     | CODING CATEGORIES                                                                                                                         | SKIP              |
|-----|-------------------------------------------------------------------------------------------------------------------------------------------------------------------------------------------|-------------------------------------------------------------------------------------------------------------------------------------------|-------------------|
| 823 | Different methods of family planning vary in how convenient they are to use. How convenient is it to use your family planning method?<br><br>READ OPTIONS OUT LOUD                        | CONVENIENT ..... 1<br>SOMEWHAT CONV..... 2<br>UNSURE/NEUTRAL..... 3<br>SOMEWHAT INCONV..... 4<br>INCONVENIENT ..... 5<br>REFUSEI... .. 99 |                   |
| 824 | Women may experience side-effects or discomfort while using a family planning method. How often do you experience any side-effect(s) or discomfort in use of your family planning method? | NEVER ..... 1<br>SOMETIMES ..... 2<br>OFTEN ..... 3<br>ALL THE TIME ..... 4<br>DON'T KNOW ..... 88<br>REFUSEI... .. 99                    |                   |
| 825 | CHECK 420:<br><br>NOT PREGNANT <input type="checkbox"/><br>OR UNSURE ↓                                                                                                                    | PREGNANT <input type="checkbox"/> → 830                                                                                                   |                   |
| 826 | If you were to get pregnant within the next year, would you look forward to telling your husband/partner? [ONLY ASK IF MARRIED]                                                           | YES ..... 1<br>NO ..... 2<br>DON'T KNOW ..... 88<br>REFUSEI... .. 99                                                                      |                   |
| 827 | If you were to get pregnant within the next year, would you look forward to telling your parents you were pregnant?                                                                       | YES ..... 1<br>NO ..... 2<br>PARENTS DECEASED ..... 3<br>DON'T KNOW ..... 88<br>REFUSEI... .. 99                                          |                   |
| 828 | If you were to get pregnant within the next year, would you be worried about how to financially support the child?                                                                        | YES ..... 1<br>NO ..... 2<br>DON'T KNOW ..... 88<br>REFUSEI... .. 99                                                                      |                   |
| 829 | If you were to get pregnant within the next year, would you consider terminating the pregnancy?                                                                                           | YES ..... 1<br>NO ..... 2<br>DON'T KNOW ..... 88<br>REFUSEI... .. 99                                                                      | Skip to section 9 |
| 830 | When you got pregnant with this pregnancy, did you look forward to telling your husband/partner? [ONLY ASK IF MARRIED]                                                                    | YES ..... 1<br>NO ..... 2<br>DON'T KNOW ..... 88<br>REFUSEI... .. 99                                                                      |                   |
| 831 | When you got pregnant with this pregnancy,, did you look forward to telling your parents you were pregnant?                                                                               | YES ..... 1<br>NO ..... 2<br>PARENTS DECEASED ..... 3<br>DON'T KNOW ..... 88<br>REFUSEI... .. 99                                          |                   |
| 832 | When you got pregnant with this pregnancy, were you worried about how to financially support the child?                                                                                   | YES ..... 1<br>NO ..... 2<br>DON'T KNOW ..... 88<br>REFUSEI... .. 99                                                                      |                   |
| 833 | When you got pregnant with this pregnancy, did you consider terminating the pregnancy?                                                                                                    | YES ..... 1<br>NO ..... 2<br>DON'T KNOW ..... 88<br>REFUSEI... .. 99                                                                      |                   |

**9. HUSBAND'S BACKGROUND AND WOMEN'S STATUS**

| NO.  | QUESTIONS AND FILTERS                                                                                                                                                                                                                                                                                                                                          | CODING CATEGORIES                                                                                                                                                                                                                                       | SKIP           |
|------|----------------------------------------------------------------------------------------------------------------------------------------------------------------------------------------------------------------------------------------------------------------------------------------------------------------------------------------------------------------|---------------------------------------------------------------------------------------------------------------------------------------------------------------------------------------------------------------------------------------------------------|----------------|
| 901  | CHECK 107:<br>CURRENTLY MARRIED/<br>LIVING WITH A MAN <input type="checkbox"/> FORMERLY MARRIED/<br>LIVED WITH A MAN <input type="checkbox"/> NEVER MARRIED<br>AND NEVER<br>LIVED WITH A MAN <input type="checkbox"/>                                                                                                                                          |                                                                                                                                                                                                                                                         | → 903<br>→ 904 |
| 902  | How old was your (husband/partner) on his last birthday?                                                                                                                                                                                                                                                                                                       | AGE IN COMPLETED YEARS <input type="text"/> <input type="text"/>                                                                                                                                                                                        |                |
| 902B | Can your (husband/partner) read a phrase/sentence in English?                                                                                                                                                                                                                                                                                                  | YES ..... 1<br>NO ..... 2<br>DON'T KNOW ..... 88<br>REFUSED ..... 99                                                                                                                                                                                    |                |
| 903  | CHECK 107:<br><br>CURRENTLY MARRIED/<br>LIVING WITH A MAN <input type="checkbox"/> FORMERLY MARRIED/<br>LIVED WITH A MAN <input type="checkbox"/><br><br>What is your husband's/partner's occupation?<br>That is, what kind of work does he mainly do?<br>What was your (last) husband's/partner's occupation?<br>That is, what kind of work did he mainly do? | AGRICULTURE AND LIVE ..... 1<br>DAILY WAGE LABOURER ..... 2<br>CIVIL SERVANT ..... 3<br>OTHER PRIVATE SERVICE HOLD ..... 4<br>BUSINESS/ PETTY BUSIN ..... 5<br>STUDENT ..... 6<br>HOUSE WIFE ..... 7<br>OTHER ..... 88<br>(SPECIFY)<br>REFUSED ..... 99 |                |
| 904  | Aside from your own house chores, have you done any work in the last seven days?                                                                                                                                                                                                                                                                               | YES ..... 1<br>NO ..... 2<br>REFUSED ..... 99                                                                                                                                                                                                           | → 908          |
| 905  | As you know, some women take up jobs for which they are paid in cash or kind. Others sell things, have a small business or work on the family farm or in the family business. In the last seven days, have you done any of these things or any other work, aside from household chores?                                                                        | YES ..... 1<br>NO ..... 2<br>REFUSED ..... 99                                                                                                                                                                                                           | → 908          |
| 906  | Although you did not work in the last seven days, do you have any job or business from which you were absent for leave, illness, vacation, maternity leave, or any other such reasons?                                                                                                                                                                         | YES ..... 1<br>NO ..... 2<br>REFUSED ..... 99                                                                                                                                                                                                           |                |
| 907  | Have you done any work in the last 12 months?                                                                                                                                                                                                                                                                                                                  | YES ..... 1<br>NO ..... 2<br>REFUSED ..... 99                                                                                                                                                                                                           | →<br>→ 909     |
| 908  | What is your occupation, that is, what kind of work do you mainly do?                                                                                                                                                                                                                                                                                          | AGRICULTURE AND LIVE ..... 1<br>DAILY WAGE LABOURER ..... 2<br>CIVIL SERVANT ..... 3<br>OTHER PRIVATE SERVICE HOLD ..... 4<br>BUSINESS/ PETTY BUSIN ..... 6<br>STUDENT ..... 7<br>HOUSE WIFE ..... 8<br>OTHER ..... 88<br>(SPECIFY)<br>REFUSED ..... 99 |                |

|                                                     |                                                                                                                                                                                                                                                                                                                                                                              |                                                                                                                                                                                                                                                                                                                                                                                                                                                                                                                                                                                                                                                                                                                                                                                                                                                                                                       |                     |   |                       |   |                                                 |    |                                                     |    |                  |   |                 |    |               |    |  |
|-----------------------------------------------------|------------------------------------------------------------------------------------------------------------------------------------------------------------------------------------------------------------------------------------------------------------------------------------------------------------------------------------------------------------------------------|-------------------------------------------------------------------------------------------------------------------------------------------------------------------------------------------------------------------------------------------------------------------------------------------------------------------------------------------------------------------------------------------------------------------------------------------------------------------------------------------------------------------------------------------------------------------------------------------------------------------------------------------------------------------------------------------------------------------------------------------------------------------------------------------------------------------------------------------------------------------------------------------------------|---------------------|---|-----------------------|---|-------------------------------------------------|----|-----------------------------------------------------|----|------------------|---|-----------------|----|---------------|----|--|
| 909                                                 | CHECK 107:<br><br><div style="display: flex; justify-content: space-around; align-items: center;"> <div style="text-align: center;">           CURRENTLY<br/>MARRIED/LIVING<br/>WITH A MAN AS IF MARRIED <input type="checkbox"/> </div> <div style="text-align: center;">           NOT MARRIED OR LIVING<br/>WITH MAN AS IF MARRIED <input type="checkbox"/> </div> </div> | 919                                                                                                                                                                                                                                                                                                                                                                                                                                                                                                                                                                                                                                                                                                                                                                                                                                                                                                   |                     |   |                       |   |                                                 |    |                                                     |    |                  |   |                 |    |               |    |  |
| 910                                                 | Who usually decides how the money <b>you</b> earn will be used:<br>mainly you, mainly your husband/partner, or<br>you and your husband/partner jointly?<br><br>[ONLY IF 908 NOT SKIPPED]                                                                                                                                                                                     | <table style="width: 100%; border-collapse: collapse;"> <tr> <td style="padding: 2px;">RESPONDENT .....</td> <td style="text-align: right; padding: 2px;">1</td> </tr> <tr> <td style="padding: 2px;">HUSBAND/PARTNER .....</td> <td style="text-align: right; padding: 2px;">2</td> </tr> <tr> <td style="padding: 2px;">RESPONDENT .....</td> <td style="text-align: right; padding: 2px;">3</td> </tr> <tr> <td style="padding: 2px;">OTHER _____</td> <td style="text-align: right; padding: 2px;">96</td> </tr> <tr> <td colspan="2" style="text-align: center; padding: 2px;">(SPECIFY)</td> </tr> <tr> <td style="padding: 2px;">DON'T KNC .....</td> <td style="text-align: right; padding: 2px;">88</td> </tr> <tr> <td style="padding: 2px;">REFUSED .....</td> <td style="text-align: right; padding: 2px;">99</td> </tr> </table>                                                         | RESPONDENT .....    | 1 | HUSBAND/PARTNER ..... | 2 | RESPONDENT .....                                | 3  | OTHER _____                                         | 96 | (SPECIFY)        |   | DON'T KNC ..... | 88 | REFUSED ..... | 99 |  |
| RESPONDENT .....                                    | 1                                                                                                                                                                                                                                                                                                                                                                            |                                                                                                                                                                                                                                                                                                                                                                                                                                                                                                                                                                                                                                                                                                                                                                                                                                                                                                       |                     |   |                       |   |                                                 |    |                                                     |    |                  |   |                 |    |               |    |  |
| HUSBAND/PARTNER .....                               | 2                                                                                                                                                                                                                                                                                                                                                                            |                                                                                                                                                                                                                                                                                                                                                                                                                                                                                                                                                                                                                                                                                                                                                                                                                                                                                                       |                     |   |                       |   |                                                 |    |                                                     |    |                  |   |                 |    |               |    |  |
| RESPONDENT .....                                    | 3                                                                                                                                                                                                                                                                                                                                                                            |                                                                                                                                                                                                                                                                                                                                                                                                                                                                                                                                                                                                                                                                                                                                                                                                                                                                                                       |                     |   |                       |   |                                                 |    |                                                     |    |                  |   |                 |    |               |    |  |
| OTHER _____                                         | 96                                                                                                                                                                                                                                                                                                                                                                           |                                                                                                                                                                                                                                                                                                                                                                                                                                                                                                                                                                                                                                                                                                                                                                                                                                                                                                       |                     |   |                       |   |                                                 |    |                                                     |    |                  |   |                 |    |               |    |  |
| (SPECIFY)                                           |                                                                                                                                                                                                                                                                                                                                                                              |                                                                                                                                                                                                                                                                                                                                                                                                                                                                                                                                                                                                                                                                                                                                                                                                                                                                                                       |                     |   |                       |   |                                                 |    |                                                     |    |                  |   |                 |    |               |    |  |
| DON'T KNC .....                                     | 88                                                                                                                                                                                                                                                                                                                                                                           |                                                                                                                                                                                                                                                                                                                                                                                                                                                                                                                                                                                                                                                                                                                                                                                                                                                                                                       |                     |   |                       |   |                                                 |    |                                                     |    |                  |   |                 |    |               |    |  |
| REFUSED .....                                       | 99                                                                                                                                                                                                                                                                                                                                                                           |                                                                                                                                                                                                                                                                                                                                                                                                                                                                                                                                                                                                                                                                                                                                                                                                                                                                                                       |                     |   |                       |   |                                                 |    |                                                     |    |                  |   |                 |    |               |    |  |
| 911                                                 | Would <b>you</b> say that the money that you earn is more than what<br>your husband/partner earns, less than what he earns,<br>or about the same?<br><br>[ONLY IF 908 NOT SKIPPED]                                                                                                                                                                                           | <table style="width: 100%; border-collapse: collapse;"> <tr> <td style="padding: 2px;">MORE THAN HIM .....</td> <td style="text-align: right; padding: 2px;">1</td> </tr> <tr> <td style="padding: 2px;">LESS THAN HIM .....</td> <td style="text-align: right; padding: 2px;">2</td> </tr> <tr> <td style="padding: 2px;">ABOUT THE SAME .....</td> <td style="text-align: right; padding: 2px;">3</td> </tr> <tr> <td style="padding: 2px;">HUSBAND/PARTNER DOESN'T<br/>BRING IN ANY MONEY .....</td> <td style="text-align: right; padding: 2px;">4</td> </tr> <tr> <td style="padding: 2px;">DON'T KNOW .....</td> <td style="text-align: right; padding: 2px;">8</td> </tr> <tr> <td style="padding: 2px;">REFUSED .....</td> <td style="text-align: right; padding: 2px;">99</td> </tr> </table>                                                                                                | MORE THAN HIM ..... | 1 | LESS THAN HIM .....   | 2 | ABOUT THE SAME .....                            | 3  | HUSBAND/PARTNER DOESN'T<br>BRING IN ANY MONEY ..... | 4  | DON'T KNOW ..... | 8 | REFUSED .....   | 99 |               |    |  |
| MORE THAN HIM .....                                 | 1                                                                                                                                                                                                                                                                                                                                                                            |                                                                                                                                                                                                                                                                                                                                                                                                                                                                                                                                                                                                                                                                                                                                                                                                                                                                                                       |                     |   |                       |   |                                                 |    |                                                     |    |                  |   |                 |    |               |    |  |
| LESS THAN HIM .....                                 | 2                                                                                                                                                                                                                                                                                                                                                                            |                                                                                                                                                                                                                                                                                                                                                                                                                                                                                                                                                                                                                                                                                                                                                                                                                                                                                                       |                     |   |                       |   |                                                 |    |                                                     |    |                  |   |                 |    |               |    |  |
| ABOUT THE SAME .....                                | 3                                                                                                                                                                                                                                                                                                                                                                            |                                                                                                                                                                                                                                                                                                                                                                                                                                                                                                                                                                                                                                                                                                                                                                                                                                                                                                       |                     |   |                       |   |                                                 |    |                                                     |    |                  |   |                 |    |               |    |  |
| HUSBAND/PARTNER DOESN'T<br>BRING IN ANY MONEY ..... | 4                                                                                                                                                                                                                                                                                                                                                                            |                                                                                                                                                                                                                                                                                                                                                                                                                                                                                                                                                                                                                                                                                                                                                                                                                                                                                                       |                     |   |                       |   |                                                 |    |                                                     |    |                  |   |                 |    |               |    |  |
| DON'T KNOW .....                                    | 8                                                                                                                                                                                                                                                                                                                                                                            |                                                                                                                                                                                                                                                                                                                                                                                                                                                                                                                                                                                                                                                                                                                                                                                                                                                                                                       |                     |   |                       |   |                                                 |    |                                                     |    |                  |   |                 |    |               |    |  |
| REFUSED .....                                       | 99                                                                                                                                                                                                                                                                                                                                                                           |                                                                                                                                                                                                                                                                                                                                                                                                                                                                                                                                                                                                                                                                                                                                                                                                                                                                                                       |                     |   |                       |   |                                                 |    |                                                     |    |                  |   |                 |    |               |    |  |
| 912                                                 | Who usually decides how <b>your (husband's/partner's)</b><br>earnings will be used: you, your husband/partner, or<br>you and your husband/partner jointly?                                                                                                                                                                                                                   | <table style="width: 100%; border-collapse: collapse;"> <tr> <td style="padding: 2px;">RESPONDENT .....</td> <td style="text-align: right; padding: 2px;">1</td> </tr> <tr> <td style="padding: 2px;">HUSBAND/PARTNER .....</td> <td style="text-align: right; padding: 2px;">2</td> </tr> <tr> <td style="padding: 2px;">RESPONDENT AND<br/>HUSBAND/PARTNER JOINTLY .....</td> <td style="text-align: right; padding: 2px;">3</td> </tr> <tr> <td style="padding: 2px;">HUSBAND/PARTNER HAS<br/>NO EARNINGS .....</td> <td style="text-align: right; padding: 2px;">4</td> </tr> <tr> <td style="padding: 2px;">OTHER _____</td> <td style="text-align: right; padding: 2px;">6</td> </tr> <tr> <td colspan="2" style="text-align: center; padding: 2px;">(SPECIFY)</td> </tr> <tr> <td style="padding: 2px;">REFUSED .....</td> <td style="text-align: right; padding: 2px;">99</td> </tr> </table> | RESPONDENT .....    | 1 | HUSBAND/PARTNER ..... | 2 | RESPONDENT AND<br>HUSBAND/PARTNER JOINTLY ..... | 3  | HUSBAND/PARTNER HAS<br>NO EARNINGS .....            | 4  | OTHER _____      | 6 | (SPECIFY)       |    | REFUSED ..... | 99 |  |
| RESPONDENT .....                                    | 1                                                                                                                                                                                                                                                                                                                                                                            |                                                                                                                                                                                                                                                                                                                                                                                                                                                                                                                                                                                                                                                                                                                                                                                                                                                                                                       |                     |   |                       |   |                                                 |    |                                                     |    |                  |   |                 |    |               |    |  |
| HUSBAND/PARTNER .....                               | 2                                                                                                                                                                                                                                                                                                                                                                            |                                                                                                                                                                                                                                                                                                                                                                                                                                                                                                                                                                                                                                                                                                                                                                                                                                                                                                       |                     |   |                       |   |                                                 |    |                                                     |    |                  |   |                 |    |               |    |  |
| RESPONDENT AND<br>HUSBAND/PARTNER JOINTLY .....     | 3                                                                                                                                                                                                                                                                                                                                                                            |                                                                                                                                                                                                                                                                                                                                                                                                                                                                                                                                                                                                                                                                                                                                                                                                                                                                                                       |                     |   |                       |   |                                                 |    |                                                     |    |                  |   |                 |    |               |    |  |
| HUSBAND/PARTNER HAS<br>NO EARNINGS .....            | 4                                                                                                                                                                                                                                                                                                                                                                            |                                                                                                                                                                                                                                                                                                                                                                                                                                                                                                                                                                                                                                                                                                                                                                                                                                                                                                       |                     |   |                       |   |                                                 |    |                                                     |    |                  |   |                 |    |               |    |  |
| OTHER _____                                         | 6                                                                                                                                                                                                                                                                                                                                                                            |                                                                                                                                                                                                                                                                                                                                                                                                                                                                                                                                                                                                                                                                                                                                                                                                                                                                                                       |                     |   |                       |   |                                                 |    |                                                     |    |                  |   |                 |    |               |    |  |
| (SPECIFY)                                           |                                                                                                                                                                                                                                                                                                                                                                              |                                                                                                                                                                                                                                                                                                                                                                                                                                                                                                                                                                                                                                                                                                                                                                                                                                                                                                       |                     |   |                       |   |                                                 |    |                                                     |    |                  |   |                 |    |               |    |  |
| REFUSED .....                                       | 99                                                                                                                                                                                                                                                                                                                                                                           |                                                                                                                                                                                                                                                                                                                                                                                                                                                                                                                                                                                                                                                                                                                                                                                                                                                                                                       |                     |   |                       |   |                                                 |    |                                                     |    |                  |   |                 |    |               |    |  |
| 913                                                 | Do you feel comfortable expressing<br>your opinions to your husband/partner<br>on working outside the home?                                                                                                                                                                                                                                                                  | <table style="width: 100%; border-collapse: collapse;"> <tr> <td style="padding: 2px;">YES .....</td> <td style="text-align: right; padding: 2px;">1</td> </tr> <tr> <td style="padding: 2px;">NO .....</td> <td style="text-align: right; padding: 2px;">2</td> </tr> <tr> <td style="padding: 2px;">DON'T KNC .....</td> <td style="text-align: right; padding: 2px;">88</td> </tr> <tr> <td style="padding: 2px;">REFUSED .....</td> <td style="text-align: right; padding: 2px;">99</td> </tr> </table>                                                                                                                                                                                                                                                                                                                                                                                           | YES .....           | 1 | NO .....              | 2 | DON'T KNC .....                                 | 88 | REFUSED .....                                       | 99 |                  |   |                 |    |               |    |  |
| YES .....                                           | 1                                                                                                                                                                                                                                                                                                                                                                            |                                                                                                                                                                                                                                                                                                                                                                                                                                                                                                                                                                                                                                                                                                                                                                                                                                                                                                       |                     |   |                       |   |                                                 |    |                                                     |    |                  |   |                 |    |               |    |  |
| NO .....                                            | 2                                                                                                                                                                                                                                                                                                                                                                            |                                                                                                                                                                                                                                                                                                                                                                                                                                                                                                                                                                                                                                                                                                                                                                                                                                                                                                       |                     |   |                       |   |                                                 |    |                                                     |    |                  |   |                 |    |               |    |  |
| DON'T KNC .....                                     | 88                                                                                                                                                                                                                                                                                                                                                                           |                                                                                                                                                                                                                                                                                                                                                                                                                                                                                                                                                                                                                                                                                                                                                                                                                                                                                                       |                     |   |                       |   |                                                 |    |                                                     |    |                  |   |                 |    |               |    |  |
| REFUSED .....                                       | 99                                                                                                                                                                                                                                                                                                                                                                           |                                                                                                                                                                                                                                                                                                                                                                                                                                                                                                                                                                                                                                                                                                                                                                                                                                                                                                       |                     |   |                       |   |                                                 |    |                                                     |    |                  |   |                 |    |               |    |  |
| 914                                                 | Do you feel comfortable expressing<br>your opinions to your husband/partner<br>on going out unescorted?                                                                                                                                                                                                                                                                      | <table style="width: 100%; border-collapse: collapse;"> <tr> <td style="padding: 2px;">YES .....</td> <td style="text-align: right; padding: 2px;">1</td> </tr> <tr> <td style="padding: 2px;">NO .....</td> <td style="text-align: right; padding: 2px;">2</td> </tr> <tr> <td style="padding: 2px;">DON'T KNC .....</td> <td style="text-align: right; padding: 2px;">88</td> </tr> <tr> <td style="padding: 2px;">REFUSED .....</td> <td style="text-align: right; padding: 2px;">99</td> </tr> </table>                                                                                                                                                                                                                                                                                                                                                                                           | YES .....           | 1 | NO .....              | 2 | DON'T KNC .....                                 | 88 | REFUSED .....                                       | 99 |                  |   |                 |    |               |    |  |
| YES .....                                           | 1                                                                                                                                                                                                                                                                                                                                                                            |                                                                                                                                                                                                                                                                                                                                                                                                                                                                                                                                                                                                                                                                                                                                                                                                                                                                                                       |                     |   |                       |   |                                                 |    |                                                     |    |                  |   |                 |    |               |    |  |
| NO .....                                            | 2                                                                                                                                                                                                                                                                                                                                                                            |                                                                                                                                                                                                                                                                                                                                                                                                                                                                                                                                                                                                                                                                                                                                                                                                                                                                                                       |                     |   |                       |   |                                                 |    |                                                     |    |                  |   |                 |    |               |    |  |
| DON'T KNC .....                                     | 88                                                                                                                                                                                                                                                                                                                                                                           |                                                                                                                                                                                                                                                                                                                                                                                                                                                                                                                                                                                                                                                                                                                                                                                                                                                                                                       |                     |   |                       |   |                                                 |    |                                                     |    |                  |   |                 |    |               |    |  |
| REFUSED .....                                       | 99                                                                                                                                                                                                                                                                                                                                                                           |                                                                                                                                                                                                                                                                                                                                                                                                                                                                                                                                                                                                                                                                                                                                                                                                                                                                                                       |                     |   |                       |   |                                                 |    |                                                     |    |                  |   |                 |    |               |    |  |
| 915                                                 | Do you feel comfortable expressing<br>your opinions to your husband/partner<br>on the education and care of your<br>children?                                                                                                                                                                                                                                                | <table style="width: 100%; border-collapse: collapse;"> <tr> <td style="padding: 2px;">YES .....</td> <td style="text-align: right; padding: 2px;">1</td> </tr> <tr> <td style="padding: 2px;">NO .....</td> <td style="text-align: right; padding: 2px;">2</td> </tr> <tr> <td style="padding: 2px;">DON'T KNC .....</td> <td style="text-align: right; padding: 2px;">88</td> </tr> <tr> <td style="padding: 2px;">REFUSED .....</td> <td style="text-align: right; padding: 2px;">99</td> </tr> </table>                                                                                                                                                                                                                                                                                                                                                                                           | YES .....           | 1 | NO .....              | 2 | DON'T KNC .....                                 | 88 | REFUSED .....                                       | 99 |                  |   |                 |    |               |    |  |
| YES .....                                           | 1                                                                                                                                                                                                                                                                                                                                                                            |                                                                                                                                                                                                                                                                                                                                                                                                                                                                                                                                                                                                                                                                                                                                                                                                                                                                                                       |                     |   |                       |   |                                                 |    |                                                     |    |                  |   |                 |    |               |    |  |
| NO .....                                            | 2                                                                                                                                                                                                                                                                                                                                                                            |                                                                                                                                                                                                                                                                                                                                                                                                                                                                                                                                                                                                                                                                                                                                                                                                                                                                                                       |                     |   |                       |   |                                                 |    |                                                     |    |                  |   |                 |    |               |    |  |
| DON'T KNC .....                                     | 88                                                                                                                                                                                                                                                                                                                                                                           |                                                                                                                                                                                                                                                                                                                                                                                                                                                                                                                                                                                                                                                                                                                                                                                                                                                                                                       |                     |   |                       |   |                                                 |    |                                                     |    |                  |   |                 |    |               |    |  |
| REFUSED .....                                       | 99                                                                                                                                                                                                                                                                                                                                                                           |                                                                                                                                                                                                                                                                                                                                                                                                                                                                                                                                                                                                                                                                                                                                                                                                                                                                                                       |                     |   |                       |   |                                                 |    |                                                     |    |                  |   |                 |    |               |    |  |

|     |                                                                                                                                                                                                                                                                                                 |                                                                                                                                                                                    |  |
|-----|-------------------------------------------------------------------------------------------------------------------------------------------------------------------------------------------------------------------------------------------------------------------------------------------------|------------------------------------------------------------------------------------------------------------------------------------------------------------------------------------|--|
| 916 | Who usually makes decisions about health care for yourself:<br>you, your husband/partner,<br>you and your husband/partner both,<br>jointly, another member of your household, or someone else?                                                                                                  | RESPONDENT = 1<br>HUSBAND/PARTNER = 2<br>RESPONDENT & HUSBAND/PARTNER JOINTLY<br>= 3<br>OTHER MALE = 4<br>OTHER FEMALE = 6<br>88=DON'T KNOW<br>99=REFUSED<br><br>1 2 3 4 5 6 88 99 |  |
| 917 | Who usually makes decisions about making major<br>household purchases?                                                                                                                                                                                                                          | CODES AS ABOVE<br>1 2 3 4 5 6 88 99                                                                                                                                                |  |
| 918 | Who usually makes decisions about visits to your family<br>or relatives?                                                                                                                                                                                                                        | CODES AS ABOVE<br>1 2 3 4 5 6 88 99<br>→                                                                                                                                           |  |
| 919 | Do you own this or any other house either alone or jointly with<br>someone else?                                                                                                                                                                                                                | ALONE ONLY ..... 1<br>JOINTLY ONLY ..... 2<br>BOTH ALONE AND JOINTLY ..... 3<br>DOES NOT OWN ..... 4<br>REFUSEI. .... 99                                                           |  |
| 920 | Do you own any land either alone or jointly with someone else?                                                                                                                                                                                                                                  | ALONE ONLY ..... 1<br>JOINTLY ONLY ..... 2<br>BOTH ALONE AND JOINTLY ..... 3<br>DOES NOT OWN ..... 4<br>REFUSED ..... 99                                                           |  |
| 922 | In your opinion, is a husband/partner justified in hitting or beating<br>his wife in any of the following situations:<br><br>If she goes out without telling him?<br>If she neglects the children?<br>If she argues with him?<br>If she refuses to have sex with him?<br>If she burns the food? | YES NO DK R<br>1 GOES OUT ..... 1 2 88 99<br>2 NEGL. CHILDREN .... 1 2 88 99<br>3 ARGUES ..... 1 2 88 99<br>4 REFUSES SEX ..... 1 2 88 99<br>5 BURNS FOOD ..... 1 2 88 99          |  |
| 923 | Have you heard of these illnesses?<br>(1)HIV/AIDS<br>(2)Hepatitis B<br>(3)Syphilis<br>(4)Dysentery<br>(5)Gonorrhea<br>(6)Genital herpes<br>(7)Genital warts                                                                                                                                     | YES NO M DK R<br>1 2 3 88 99<br>1 2 3 88 99                                                             |  |
| 924 | Do you think that you have enough information about these<br>types of illnesses?                                                                                                                                                                                                                | YES..... 1<br>NO ..... 2<br>DON'T KNOW ..... 88<br>REFUSE..... 99                                                                                                                  |  |



|     |                                                                                                                                                                             |                                                                                                                                                                                                                                                                                                                                                                                                                                                                                                                                                                                                                                                                                                                            |      |
|-----|-----------------------------------------------------------------------------------------------------------------------------------------------------------------------------|----------------------------------------------------------------------------------------------------------------------------------------------------------------------------------------------------------------------------------------------------------------------------------------------------------------------------------------------------------------------------------------------------------------------------------------------------------------------------------------------------------------------------------------------------------------------------------------------------------------------------------------------------------------------------------------------------------------------------|------|
| 925 | Apart from AIDS, have you heard about other infections that can be transmitted through sexual contact?                                                                      | YES..... 1<br>NO ..... 2<br>DON'T KNOW/UNSURE ..... 88<br>REFUSE..... 99                                                                                                                                                                                                                                                                                                                                                                                                                                                                                                                                                                                                                                                   |      |
| 926 | Now I would like to ask you some questions about your health in the last 12 months. During the last 12 months, have you had a disease which you got through sexual contact? | YES..... 1<br>NO ..... 2<br>DON'T KNOW ..... 88<br>REFUSE..... 99                                                                                                                                                                                                                                                                                                                                                                                                                                                                                                                                                                                                                                                          |      |
| 927 | Sometimes women experience a bad-smelling abnormal genital discharge. During the last 12 months, have you had a bad-smelling abnormal genital discharge?                    | YES..... 1<br>NO ..... 2<br>DON'T KNOW ..... 88<br>REFUSE..... 99                                                                                                                                                                                                                                                                                                                                                                                                                                                                                                                                                                                                                                                          |      |
| 928 | Sometimes women have small, red or flesh colored bumps and blisters in the private area. During the last 12 months, have you ever had these?                                | YES..... 1<br>NO ..... 2<br>DON'T KNOW ..... 88<br>REFUSE..... 99                                                                                                                                                                                                                                                                                                                                                                                                                                                                                                                                                                                                                                                          |      |
| 929 | If YES ON ANY OF 926/927/928, ASK:<br><br>The last time you that condition, did you seek any kind of advice or treatment?                                                   | YES..... 1<br>NO ..... 2<br>DON'T KNOW ..... 88<br>REFUSE..... 99                                                                                                                                                                                                                                                                                                                                                                                                                                                                                                                                                                                                                                                          | 1001 |
| 930 | Where did you go?<br>Any other place?<br><br>PROBE TO IDENTIFY EACH TYPE OF SOURCE.<br>IF UNABLE TO DETERMINE IF PUBLIC OR PRIVATE<br>(NAME OF PLACE(S))                    | <b>PUBLIC SECTOR</b><br>GOVT. HOSPITAL/P ..... 11<br>GOVT. HEALTH CENTER/CLI ..... 12<br>GOVT. HEALTH POST/CHPS ..... 13<br>FAMILY PLANNING CLII ..... 14<br>MOBILE CLINI ..... 15<br>FIELDWORKE ..... 16<br>OTHER PUBLIC<br>SECTOR ..... 17<br>(SPECIFY)<br><br><b>PRIVATE MEDICAL SECTOR</b><br>PRIVATE HOSPITAL/CLINIC ..... 18<br>PRIVATE DOCTOR ..... 19<br>PHARMACY ..... 20<br>CHEMICAL/DRUG STORE ..... 21<br>FP/PPAG CLINIC ..... 22<br>MATERNITY HOME ..... 23<br>OTHER PRIVATE MEDICAL<br>..... 24<br>(SPECIFY)<br><br><b>OTHER SOURCE</b><br>SHOP/MARKET ..... 25<br>COMMUNITY VOLUNTEER ..... 26<br>FRIEND/RELATIVE ..... 27<br><br>OTHER ..... 96<br>(SPECIFY)<br><br>DON'T KNC ..... 88<br>REFUSEI ..... 99 |      |

**10. OTHER HEALTH ISSUES**

| NO.                   | QUESTIONS AND FILTERS                                                                                                                                                                                                                                                                                                                                                                                                                                                                   | CODING CATEGORIES                                                                                                                                                                                                                                                                                                                                                                                                                                                                                                                                                                                                                                                                                                                                                                                                                                                                                                                                                                                                                                                                                                                                                                                                                                                                                                                                                                                            | SKIP          |                     |                           |    |    |  |                    |   |   |   |   |    |                 |   |   |   |   |    |              |   |   |   |   |    |             |   |   |   |   |    |                       |   |   |   |   |    |                   |   |     |   |   |    |            |   |   |   |  |    |         |   |   |   |  |    |  |
|-----------------------|-----------------------------------------------------------------------------------------------------------------------------------------------------------------------------------------------------------------------------------------------------------------------------------------------------------------------------------------------------------------------------------------------------------------------------------------------------------------------------------------|--------------------------------------------------------------------------------------------------------------------------------------------------------------------------------------------------------------------------------------------------------------------------------------------------------------------------------------------------------------------------------------------------------------------------------------------------------------------------------------------------------------------------------------------------------------------------------------------------------------------------------------------------------------------------------------------------------------------------------------------------------------------------------------------------------------------------------------------------------------------------------------------------------------------------------------------------------------------------------------------------------------------------------------------------------------------------------------------------------------------------------------------------------------------------------------------------------------------------------------------------------------------------------------------------------------------------------------------------------------------------------------------------------------|---------------|---------------------|---------------------------|----|----|--|--------------------|---|---|---|---|----|-----------------|---|---|---|---|----|--------------|---|---|---|---|----|-------------|---|---|---|---|----|-----------------------|---|---|---|---|----|-------------------|---|-----|---|---|----|------------|---|---|---|--|----|---------|---|---|---|--|----|--|
| 1001                  | <p>Many different factors can prevent women from getting family planning advice or treatment for themselves. When you want to get family planning advice or treatment, is each of the following a big problem or not?</p> <p>Getting permission to go to the doctor?</p> <p>Getting money needed for advice or treatment?</p> <p>The distance to the health facility?</p> <p>Not wanting to go alone?</p> <p>Not having time because of work?</p> <p>No one to look after children?</p> | <table border="0"> <tr> <td></td> <td align="center">BIG<br/>PROB-<br/>LEM</td> <td align="center">NOT A BIG<br/>PROB-<br/>LEM</td> <td align="center">DK</td> <td align="center">R</td> <td></td> </tr> <tr> <td>1 PERMISSION TO GO</td> <td align="center">1</td> <td align="center">2</td> <td></td> <td align="center">#</td> <td align="center">99</td> </tr> <tr> <td>2 GETTING MONEY</td> <td align="center">1</td> <td align="center">2</td> <td></td> <td align="center">#</td> <td align="center">99</td> </tr> <tr> <td>3 DISTANCE</td> <td align="center">1</td> <td align="center">2</td> <td></td> <td align="center">#</td> <td align="center">99</td> </tr> <tr> <td>4 GO ALONE</td> <td align="center">1</td> <td align="center">2</td> <td></td> <td align="center">#</td> <td align="center">99</td> </tr> <tr> <td>5 NO TIME DUE TO WORK</td> <td align="center">1</td> <td align="center">2</td> <td></td> <td align="center">#</td> <td align="center">99</td> </tr> <tr> <td>6 NO CHILDCARE</td> <td></td> <td align="center">1 2</td> <td></td> <td align="center">#</td> <td align="center">99</td> </tr> </table>                                                                                                                                                                                                                                                                  |               | BIG<br>PROB-<br>LEM | NOT A BIG<br>PROB-<br>LEM | DK | R  |  | 1 PERMISSION TO GO | 1 | 2 |   | # | 99 | 2 GETTING MONEY | 1 | 2 |   | # | 99 | 3 DISTANCE   | 1 | 2 |   | # | 99 | 4 GO ALONE  | 1 | 2 |   | # | 99 | 5 NO TIME DUE TO WORK | 1 | 2 |   | # | 99 | 6 NO CHILDCARE    |   | 1 2 |   | # | 99 |            |   |   |   |  |    |         |   |   |   |  |    |  |
|                       | BIG<br>PROB-<br>LEM                                                                                                                                                                                                                                                                                                                                                                                                                                                                     | NOT A BIG<br>PROB-<br>LEM                                                                                                                                                                                                                                                                                                                                                                                                                                                                                                                                                                                                                                                                                                                                                                                                                                                                                                                                                                                                                                                                                                                                                                                                                                                                                                                                                                                    | DK            | R                   |                           |    |    |  |                    |   |   |   |   |    |                 |   |   |   |   |    |              |   |   |   |   |    |             |   |   |   |   |    |                       |   |   |   |   |    |                   |   |     |   |   |    |            |   |   |   |  |    |         |   |   |   |  |    |  |
| 1 PERMISSION TO GO    | 1                                                                                                                                                                                                                                                                                                                                                                                                                                                                                       | 2                                                                                                                                                                                                                                                                                                                                                                                                                                                                                                                                                                                                                                                                                                                                                                                                                                                                                                                                                                                                                                                                                                                                                                                                                                                                                                                                                                                                            |               | #                   | 99                        |    |    |  |                    |   |   |   |   |    |                 |   |   |   |   |    |              |   |   |   |   |    |             |   |   |   |   |    |                       |   |   |   |   |    |                   |   |     |   |   |    |            |   |   |   |  |    |         |   |   |   |  |    |  |
| 2 GETTING MONEY       | 1                                                                                                                                                                                                                                                                                                                                                                                                                                                                                       | 2                                                                                                                                                                                                                                                                                                                                                                                                                                                                                                                                                                                                                                                                                                                                                                                                                                                                                                                                                                                                                                                                                                                                                                                                                                                                                                                                                                                                            |               | #                   | 99                        |    |    |  |                    |   |   |   |   |    |                 |   |   |   |   |    |              |   |   |   |   |    |             |   |   |   |   |    |                       |   |   |   |   |    |                   |   |     |   |   |    |            |   |   |   |  |    |         |   |   |   |  |    |  |
| 3 DISTANCE            | 1                                                                                                                                                                                                                                                                                                                                                                                                                                                                                       | 2                                                                                                                                                                                                                                                                                                                                                                                                                                                                                                                                                                                                                                                                                                                                                                                                                                                                                                                                                                                                                                                                                                                                                                                                                                                                                                                                                                                                            |               | #                   | 99                        |    |    |  |                    |   |   |   |   |    |                 |   |   |   |   |    |              |   |   |   |   |    |             |   |   |   |   |    |                       |   |   |   |   |    |                   |   |     |   |   |    |            |   |   |   |  |    |         |   |   |   |  |    |  |
| 4 GO ALONE            | 1                                                                                                                                                                                                                                                                                                                                                                                                                                                                                       | 2                                                                                                                                                                                                                                                                                                                                                                                                                                                                                                                                                                                                                                                                                                                                                                                                                                                                                                                                                                                                                                                                                                                                                                                                                                                                                                                                                                                                            |               | #                   | 99                        |    |    |  |                    |   |   |   |   |    |                 |   |   |   |   |    |              |   |   |   |   |    |             |   |   |   |   |    |                       |   |   |   |   |    |                   |   |     |   |   |    |            |   |   |   |  |    |         |   |   |   |  |    |  |
| 5 NO TIME DUE TO WORK | 1                                                                                                                                                                                                                                                                                                                                                                                                                                                                                       | 2                                                                                                                                                                                                                                                                                                                                                                                                                                                                                                                                                                                                                                                                                                                                                                                                                                                                                                                                                                                                                                                                                                                                                                                                                                                                                                                                                                                                            |               | #                   | 99                        |    |    |  |                    |   |   |   |   |    |                 |   |   |   |   |    |              |   |   |   |   |    |             |   |   |   |   |    |                       |   |   |   |   |    |                   |   |     |   |   |    |            |   |   |   |  |    |         |   |   |   |  |    |  |
| 6 NO CHILDCARE        |                                                                                                                                                                                                                                                                                                                                                                                                                                                                                         | 1 2                                                                                                                                                                                                                                                                                                                                                                                                                                                                                                                                                                                                                                                                                                                                                                                                                                                                                                                                                                                                                                                                                                                                                                                                                                                                                                                                                                                                          |               | #                   | 99                        |    |    |  |                    |   |   |   |   |    |                 |   |   |   |   |    |              |   |   |   |   |    |             |   |   |   |   |    |                       |   |   |   |   |    |                   |   |     |   |   |    |            |   |   |   |  |    |         |   |   |   |  |    |  |
| 1002                  | Are you covered by any health insurance?                                                                                                                                                                                                                                                                                                                                                                                                                                                | <p>YES ..... 1</p> <p>NO ..... 2</p> <p>REFUSED ..... #</p>                                                                                                                                                                                                                                                                                                                                                                                                                                                                                                                                                                                                                                                                                                                                                                                                                                                                                                                                                                                                                                                                                                                                                                                                                                                                                                                                                  | <p>→ 1005</p> |                     |                           |    |    |  |                    |   |   |   |   |    |                 |   |   |   |   |    |              |   |   |   |   |    |             |   |   |   |   |    |                       |   |   |   |   |    |                   |   |     |   |   |    |            |   |   |   |  |    |         |   |   |   |  |    |  |
| 1003                  | What type of health insurance are you covered by?<br>RECORD ALL MENTIONED.                                                                                                                                                                                                                                                                                                                                                                                                              | <p>NATIONAL/DISTRICT HEALTH INSURANCE (NHIS) ..... 1</p> <p>HEALTH INSURANCE THROUGH EMPLOYEE ..... 2</p> <p>MUTUAL HEALTH ORGANIZATION/ COMMUNITY-BASED HEALTH INSURANCE ..... 3</p> <p>OTHER PRIVATELY PURCHASED COMMERCIAL HEALTH INSURANCE ..... 4</p> <p>OTHER _____ #</p> <p align="center">(SPECIFY)</p> <p>DON'T KNC ..... #</p> <p>REFUSED ..... #</p>                                                                                                                                                                                                                                                                                                                                                                                                                                                                                                                                                                                                                                                                                                                                                                                                                                                                                                                                                                                                                                              |               |                     |                           |    |    |  |                    |   |   |   |   |    |                 |   |   |   |   |    |              |   |   |   |   |    |             |   |   |   |   |    |                       |   |   |   |   |    |                   |   |     |   |   |    |            |   |   |   |  |    |         |   |   |   |  |    |  |
| GH_10_1               | Can I see your insurance card or other evidence of this insurance cover?                                                                                                                                                                                                                                                                                                                                                                                                                | <p>Yes, Card seen with current cover ..... 1</p> <p>Yes, Card seen but no current cover ..... 2</p> <p>No, Card not seen ..... 3</p> <p>REFUSED ..... #</p>                                                                                                                                                                                                                                                                                                                                                                                                                                                                                                                                                                                                                                                                                                                                                                                                                                                                                                                                                                                                                                                                                                                                                                                                                                                  |               |                     |                           |    |    |  |                    |   |   |   |   |    |                 |   |   |   |   |    |              |   |   |   |   |    |             |   |   |   |   |    |                       |   |   |   |   |    |                   |   |     |   |   |    |            |   |   |   |  |    |         |   |   |   |  |    |  |
| 1004                  | <p>Does your insurance cover any of the following maternity benefits:</p> <p>a) Antenatal health care?</p> <p>b) Childbirth health care in a health facility?</p> <p>c) Postnatal health care for the mother?</p> <p>d) Postnatal health care for the child?</p> <p>e) Cash benefits during maternity leave?</p> <p>f) Family planning methods or services?</p> <p>g) Abortion services?</p> <p>h) Other?</p>                                                                           | <table border="0"> <tr> <td></td> <td align="center">YES</td> <td align="center">NO</td> <td align="center">DK</td> <td align="center">RF</td> <td></td> </tr> <tr> <td>1 ANTENATAL (ANC)</td> <td align="center">1</td> <td align="center">2</td> <td align="center">#</td> <td></td> <td align="center">99</td> </tr> <tr> <td>2 CHILDBIRTH</td> <td align="center">1</td> <td align="center">2</td> <td align="center">#</td> <td></td> <td align="center">99</td> </tr> <tr> <td>3 PNC MOTHER</td> <td align="center">1</td> <td align="center">2</td> <td align="center">#</td> <td></td> <td align="center">99</td> </tr> <tr> <td>4 PNC CHILD</td> <td align="center">1</td> <td align="center">2</td> <td align="center">#</td> <td></td> <td align="center">99</td> </tr> <tr> <td>5 CASH BENEFITS</td> <td align="center">1</td> <td align="center">2</td> <td align="center">#</td> <td></td> <td align="center">99</td> </tr> <tr> <td>6 FAMILY PLANNING</td> <td align="center">1</td> <td align="center">2</td> <td align="center">#</td> <td></td> <td align="center">99</td> </tr> <tr> <td>7 ABORTION</td> <td align="center">1</td> <td align="center">2</td> <td align="center">#</td> <td></td> <td align="center">99</td> </tr> <tr> <td>8 OTHER</td> <td align="center">1</td> <td align="center">2</td> <td align="center">#</td> <td></td> <td align="center">99</td> </tr> </table> |               | YES                 | NO                        | DK | RF |  | 1 ANTENATAL (ANC)  | 1 | 2 | # |   | 99 | 2 CHILDBIRTH    | 1 | 2 | # |   | 99 | 3 PNC MOTHER | 1 | 2 | # |   | 99 | 4 PNC CHILD | 1 | 2 | # |   | 99 | 5 CASH BENEFITS       | 1 | 2 | # |   | 99 | 6 FAMILY PLANNING | 1 | 2   | # |   | 99 | 7 ABORTION | 1 | 2 | # |  | 99 | 8 OTHER | 1 | 2 | # |  | 99 |  |
|                       | YES                                                                                                                                                                                                                                                                                                                                                                                                                                                                                     | NO                                                                                                                                                                                                                                                                                                                                                                                                                                                                                                                                                                                                                                                                                                                                                                                                                                                                                                                                                                                                                                                                                                                                                                                                                                                                                                                                                                                                           | DK            | RF                  |                           |    |    |  |                    |   |   |   |   |    |                 |   |   |   |   |    |              |   |   |   |   |    |             |   |   |   |   |    |                       |   |   |   |   |    |                   |   |     |   |   |    |            |   |   |   |  |    |         |   |   |   |  |    |  |
| 1 ANTENATAL (ANC)     | 1                                                                                                                                                                                                                                                                                                                                                                                                                                                                                       | 2                                                                                                                                                                                                                                                                                                                                                                                                                                                                                                                                                                                                                                                                                                                                                                                                                                                                                                                                                                                                                                                                                                                                                                                                                                                                                                                                                                                                            | #             |                     | 99                        |    |    |  |                    |   |   |   |   |    |                 |   |   |   |   |    |              |   |   |   |   |    |             |   |   |   |   |    |                       |   |   |   |   |    |                   |   |     |   |   |    |            |   |   |   |  |    |         |   |   |   |  |    |  |
| 2 CHILDBIRTH          | 1                                                                                                                                                                                                                                                                                                                                                                                                                                                                                       | 2                                                                                                                                                                                                                                                                                                                                                                                                                                                                                                                                                                                                                                                                                                                                                                                                                                                                                                                                                                                                                                                                                                                                                                                                                                                                                                                                                                                                            | #             |                     | 99                        |    |    |  |                    |   |   |   |   |    |                 |   |   |   |   |    |              |   |   |   |   |    |             |   |   |   |   |    |                       |   |   |   |   |    |                   |   |     |   |   |    |            |   |   |   |  |    |         |   |   |   |  |    |  |
| 3 PNC MOTHER          | 1                                                                                                                                                                                                                                                                                                                                                                                                                                                                                       | 2                                                                                                                                                                                                                                                                                                                                                                                                                                                                                                                                                                                                                                                                                                                                                                                                                                                                                                                                                                                                                                                                                                                                                                                                                                                                                                                                                                                                            | #             |                     | 99                        |    |    |  |                    |   |   |   |   |    |                 |   |   |   |   |    |              |   |   |   |   |    |             |   |   |   |   |    |                       |   |   |   |   |    |                   |   |     |   |   |    |            |   |   |   |  |    |         |   |   |   |  |    |  |
| 4 PNC CHILD           | 1                                                                                                                                                                                                                                                                                                                                                                                                                                                                                       | 2                                                                                                                                                                                                                                                                                                                                                                                                                                                                                                                                                                                                                                                                                                                                                                                                                                                                                                                                                                                                                                                                                                                                                                                                                                                                                                                                                                                                            | #             |                     | 99                        |    |    |  |                    |   |   |   |   |    |                 |   |   |   |   |    |              |   |   |   |   |    |             |   |   |   |   |    |                       |   |   |   |   |    |                   |   |     |   |   |    |            |   |   |   |  |    |         |   |   |   |  |    |  |
| 5 CASH BENEFITS       | 1                                                                                                                                                                                                                                                                                                                                                                                                                                                                                       | 2                                                                                                                                                                                                                                                                                                                                                                                                                                                                                                                                                                                                                                                                                                                                                                                                                                                                                                                                                                                                                                                                                                                                                                                                                                                                                                                                                                                                            | #             |                     | 99                        |    |    |  |                    |   |   |   |   |    |                 |   |   |   |   |    |              |   |   |   |   |    |             |   |   |   |   |    |                       |   |   |   |   |    |                   |   |     |   |   |    |            |   |   |   |  |    |         |   |   |   |  |    |  |
| 6 FAMILY PLANNING     | 1                                                                                                                                                                                                                                                                                                                                                                                                                                                                                       | 2                                                                                                                                                                                                                                                                                                                                                                                                                                                                                                                                                                                                                                                                                                                                                                                                                                                                                                                                                                                                                                                                                                                                                                                                                                                                                                                                                                                                            | #             |                     | 99                        |    |    |  |                    |   |   |   |   |    |                 |   |   |   |   |    |              |   |   |   |   |    |             |   |   |   |   |    |                       |   |   |   |   |    |                   |   |     |   |   |    |            |   |   |   |  |    |         |   |   |   |  |    |  |
| 7 ABORTION            | 1                                                                                                                                                                                                                                                                                                                                                                                                                                                                                       | 2                                                                                                                                                                                                                                                                                                                                                                                                                                                                                                                                                                                                                                                                                                                                                                                                                                                                                                                                                                                                                                                                                                                                                                                                                                                                                                                                                                                                            | #             |                     | 99                        |    |    |  |                    |   |   |   |   |    |                 |   |   |   |   |    |              |   |   |   |   |    |             |   |   |   |   |    |                       |   |   |   |   |    |                   |   |     |   |   |    |            |   |   |   |  |    |         |   |   |   |  |    |  |
| 8 OTHER               | 1                                                                                                                                                                                                                                                                                                                                                                                                                                                                                       | 2                                                                                                                                                                                                                                                                                                                                                                                                                                                                                                                                                                                                                                                                                                                                                                                                                                                                                                                                                                                                                                                                                                                                                                                                                                                                                                                                                                                                            | #             |                     | 99                        |    |    |  |                    |   |   |   |   |    |                 |   |   |   |   |    |              |   |   |   |   |    |             |   |   |   |   |    |                       |   |   |   |   |    |                   |   |     |   |   |    |            |   |   |   |  |    |         |   |   |   |  |    |  |
| 1005                  | RECORD THE TIME.                                                                                                                                                                                                                                                                                                                                                                                                                                                                        | <p>HOUR ..... <table border="1" style="display: inline-table; vertical-align: middle;"><tr><td style="width: 20px; height: 20px;"></td><td style="width: 20px; height: 20px;"></td></tr></table></p> <p>MINUTES ..... <table border="1" style="display: inline-table; vertical-align: middle;"><tr><td style="width: 20px; height: 20px;"></td><td style="width: 20px; height: 20px;"></td></tr></table></p>                                                                                                                                                                                                                                                                                                                                                                                                                                                                                                                                                                                                                                                                                                                                                                                                                                                                                                                                                                                                 |               |                     |                           |    |    |  |                    |   |   |   |   |    |                 |   |   |   |   |    |              |   |   |   |   |    |             |   |   |   |   |    |                       |   |   |   |   |    |                   |   |     |   |   |    |            |   |   |   |  |    |         |   |   |   |  |    |  |
|                       |                                                                                                                                                                                                                                                                                                                                                                                                                                                                                         |                                                                                                                                                                                                                                                                                                                                                                                                                                                                                                                                                                                                                                                                                                                                                                                                                                                                                                                                                                                                                                                                                                                                                                                                                                                                                                                                                                                                              |               |                     |                           |    |    |  |                    |   |   |   |   |    |                 |   |   |   |   |    |              |   |   |   |   |    |             |   |   |   |   |    |                       |   |   |   |   |    |                   |   |     |   |   |    |            |   |   |   |  |    |         |   |   |   |  |    |  |
|                       |                                                                                                                                                                                                                                                                                                                                                                                                                                                                                         |                                                                                                                                                                                                                                                                                                                                                                                                                                                                                                                                                                                                                                                                                                                                                                                                                                                                                                                                                                                                                                                                                                                                                                                                                                                                                                                                                                                                              |               |                     |                           |    |    |  |                    |   |   |   |   |    |                 |   |   |   |   |    |              |   |   |   |   |    |             |   |   |   |   |    |                       |   |   |   |   |    |                   |   |     |   |   |    |            |   |   |   |  |    |         |   |   |   |  |    |  |

**FOLLOW-UP INFORMATION**

**FOLLOW-UP INFORMATION**

Thank you for this information. We are planning to conduct follow-up interviews with some women whom we are interviewing now. If you are selected for a follow-up interview, you will be contacted beforehand using the contact information that you have given us, and you will be provided with information on how to participate in the interview.

**CONTACT 1**

FULL NAME: \_\_\_\_\_

RELATIONSHIP TO YOU: \_\_\_\_\_

LOCATION OF HOUSE/DIRECTIONS: \_\_\_\_\_

\_\_\_\_\_

\_\_\_\_\_

PHONE NUMBER: \_\_\_\_\_

E-MAIL ADDRESS: \_\_\_\_\_

**CONTACT 2**

FULL NAME: \_\_\_\_\_

RELATIONSHIP TO YOU: \_\_\_\_\_

LOCATION OF HOUSE/DIRECTIONS: \_\_\_\_\_

\_\_\_\_\_

\_\_\_\_\_

PHONE NUMBER: \_\_\_\_\_

E-MAIL ADDRESS: \_\_\_\_\_

**OTHER HOUSEHOLD CONTACT:**

What is the name and phone number of someone else within your household?

NAME: \_\_\_\_\_

PHONE: \_\_\_\_\_

RELATIONSHIP TO YOU: \_\_\_\_\_

**PLANS TO MOVE:**

Does your family/household have any plans to move in the next two years? YES NO

IF YES: Where do you plan to move to? LOCATION: \_\_\_\_\_

\_\_\_\_\_

\_\_\_\_\_

**CONTRACEPTIVE CALENDAR**

**INSTRUCTIONS:**

ONLY ONE CODE SHOULD APPEAR IN ANY BOX.  
 COLUMN 1 REQUIRES A CODE IN EVERY MONTH.

**INFORMATION TO BE CODED FOR EACH COLUMN**

**COLUMN 1: BIRTHS, PREGNANCIES, CONTRACEPTIVE USE\*\***

- B BIRTHS
- P PREGNANCIES
- T TERMINATIONS
  
- 0 NO METHOD
- 1 FEMALE STERILIZATION
- 2 MALE STERILIZATION
- 3 IUD
- 4 INJECTABLES
- 5 IMPLANTS
- 6 PILL
- 7 CONDOM
- 8 FEMALE CONDOM
- 9 EMERGENCY CONTRACEPTION
- J RHYTHM METHOD/STANDARD DAYS METHOD/CYCLEBEADS
- K LACTATIONAL AMENORRHEA METHOD
- L N\_TABLET
- M WITHDRAWAL
- X OTHER MODERN METHOD
- Y OTHER TRADITIONAL METHOD

**COLUMN 2: DISCONTINUATION OF CONTRACEPTIVE USE**

- 0 INFREQUENT SEX/HUSBAND AWAY
- 1 BECAME PREGNANT WHILE USING
- 2 WANTED TO BECOME PREGNANT
- 3 HUSBAND/PARTNER DISAPPROVED
- 4 WANTED MORE EFFECTIVE METHOD
- 5 SIDE EFFECTS/HEALTH CONCERNS
- 6 LACK OF ACCESS/TOO FAR
- 7 COSTS TOO MUCH
- 8 INCONVENIENT TO USE
- F UP TO GOD/FATALISTIC
- A DIFFICULT TO GET PREGNANT/MENOPAUSAL
- D MARITAL DISSOLUTION/SEPARATION
- X OTHER \_\_\_\_\_  
 (SPECIFY)
- Z DON'T KNOW

\* Year of fieldwork is assumed to be 2018. For fieldwork beginning in 2019 or 2020, the years should be adjusted.

\*\* Response categories may be added for other methods, including fertility awareness methods.

|         |    |  | 1 | 2 |   |
|---------|----|--|---|---|---|
| 12 DEC  | 1  |  |   |   |   |
| 11 NOV  | 2  |  |   |   |   |
| 10 OCT  | 3  |  |   |   |   |
| 9 SEP   | 4  |  |   |   |   |
| 2 8 AUG | 5  |  |   |   | 2 |
| 0 7 JUL | 6  |  |   |   | 0 |
| 1 6 JUN | 7  |  |   |   | 1 |
| 8 5 MAY | 8  |  |   |   | 8 |
| * 4 APR | 9  |  |   |   | * |
| 3 MAR   | 10 |  |   |   |   |
| 2 FEB   | 11 |  |   |   |   |
| 1 JAN   | 12 |  |   |   |   |
| <hr/>   |    |  |   |   |   |
| 12 DEC  | 13 |  |   |   |   |
| 11 NOV  | 14 |  |   |   |   |
| 10 OCT  | 15 |  |   |   |   |
| 9 SEP   | 16 |  |   |   |   |
| 2 8 AUG | 17 |  |   |   | 2 |
| 0 7 JUL | 18 |  |   |   | 0 |
| 1 6 JUN | 19 |  |   |   | 1 |
| 7 5 MAY | 20 |  |   |   | 7 |
| * 4 APR | 21 |  |   |   | * |
| 3 MAR   | 22 |  |   |   |   |
| 2 FEB   | 23 |  |   |   |   |
| 1 JAN   | 24 |  |   |   |   |
| <hr/>   |    |  |   |   |   |
| 12 DEC  | 25 |  |   |   |   |
| 11 NOV  | 26 |  |   |   |   |
| 10 OCT  | 27 |  |   |   |   |
| 9 SEP   | 28 |  |   |   |   |
| 2 8 AUG | 29 |  |   |   | 2 |
| 0 7 JUL | 30 |  |   |   | 0 |
| 1 6 JUN | 31 |  |   |   | 1 |
| 6 5 MAY | 32 |  |   |   | 6 |
| * 4 APR | 33 |  |   |   | * |
| 3 MAR   | 34 |  |   |   |   |
| 2 FEB   | 35 |  |   |   |   |
| 1 JAN   | 36 |  |   |   |   |
| <hr/>   |    |  |   |   |   |
| 12 DEC  | 37 |  |   |   |   |
| 11 NOV  | 38 |  |   |   |   |
| 10 OCT  | 39 |  |   |   |   |
| 9 SEP   | 40 |  |   |   |   |
| 2 8 AUG | 41 |  |   |   | 2 |
| 0 7 JUL | 42 |  |   |   | 0 |
| 1 6 JUN | 43 |  |   |   | 1 |
| 5 5 MAY | 44 |  |   |   | 5 |
| * 4 APR | 45 |  |   |   | * |
| 3 MAR   | 46 |  |   |   |   |
| 2 FEB   | 47 |  |   |   |   |
| 1 JAN   | 48 |  |   |   |   |

---

**END OF SURVEY:**

You have now reached the end of the interview. Thank you for your time and responses. This has been extremely helpful. As I said in the beginning, the purpose of this discussion was to help us learn about women's health in Ghana I also want to remind you that all of your responses will remain confidential.

Do you have any further questions for me at this time?

Thank you again for your help.

SIGNATURE OF INTERVIEWER: \_\_\_\_\_ DATE: \_\_\_\_\_

END. GO TO INTERVIEWER OBSERVATIONS.

**INTERVIEWER'S OBSERVATIONS**

TO BE FILLED IN AFTER COMPLETING INTERVIEW

COMMENTS ABOUT INTERVIEW:

---

---

---

---

---

---

COMMENTS ON SPECIFIC QUESTIONS:

---

---

---

---

---

---

ANY OTHER COMMENTS:

---

---

---

---

---

---

**EDITOR'S OBSERVATIONS**

---

---

---

---

---

---
